# Supplementary material for: Transcriptomic Analysis of Seed Coats in Yellow-Seeded Brassica napus Reveals Novel Genes That Influence Proanthocyanidin Biosynthesis
Source: PubMed Central journal article supplement (PMC5633857; doi:10.3389/fpls.2017.01674), 2017-10-05
Supplement: Presentation1.pdf [file Presentation1.pdf]

## *Supplementary Material*

# **Transcriptomic Analysis of Seed Coats in Yellow-seeded *Brassica napus* Reveals Novel Genes that Influence Proanthocyanidin Biosynthesis**

Meiyan Hong<sup>1</sup>, Kaining Hu<sup>1</sup>, Tiantian Tian<sup>1</sup>, Xia Li<sup>2</sup>, Li Chen<sup>3</sup>, Yan Zhang<sup>4</sup>, Bin Yi<sup>1</sup>, Jing Wen<sup>1</sup>, Chaozhi Ma<sup>1</sup>, Jinxiong Shen<sup>1</sup>, Tingdong Fu<sup>1</sup>, Jinxing Tu<sup>1\*</sup>

\* **Correspondence:** Jinxing Tu, [tujx@mail.hzau.edu.cn](mailto:tujx@mail.hzau.edu.cn)

## **1 Supplementary Data**

**Supplementary File 1.** Sequences of the primers used for qRT-PCR analysis.

**Supplementary File 2.** DEGs in yellow and brown seed coats during seed development (14-42 days after flowering (daf)).

**Supplementary File 3.** Enriched GO terms of DEGs during seed development using Blast2GO.

**Supplementary File 4.** Statistics of the enriched GO terms of DEGs at each seed developmental stage.

**Supplementary File 5.** KEGG pathways of DEGs during seed development.

**Supplementary File 6.** Expression levels of DEGs involved in phenylpropanoid and flavonoid pathways and other DEGs identified in the RNA-seq analysis.

**Supplementary File 7.** Relative expression levels of DEGs in seed coats from NILs (B-NIL and Y-NIL) and parents (94570 and No. 2127-17) during seed development by qRT-PCR analysis.

## **2 Supplementary Figures and Tables**

### **2.1 Supplementary Figures**

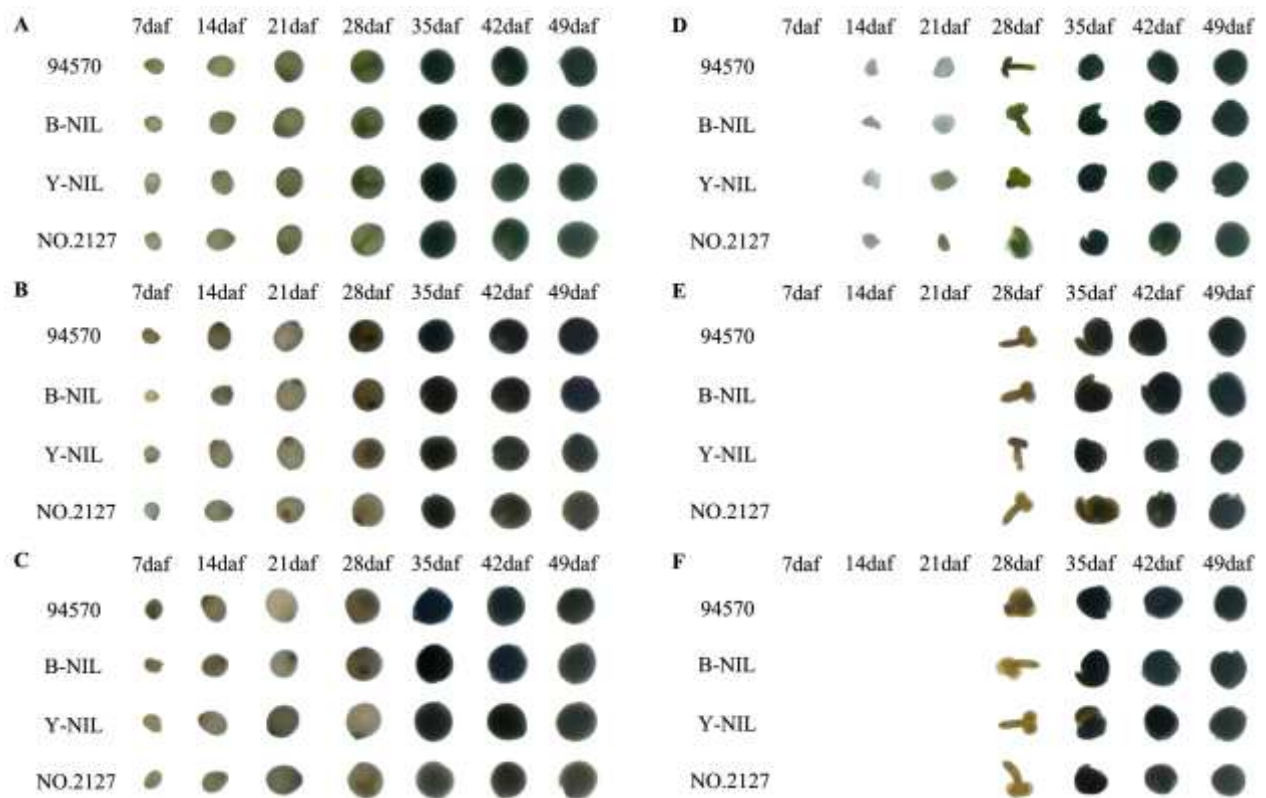

**Supplementary Figure 1.** Chemical stainings of seeds and embryos from four *B. napus* lines at 7, 14, 21, 28, 35, 42, and 49 daf. (A-C) Seeds before staining (A), after vanillin staining (B), and after DMACA staining (C). (D-F) Embryos before staining (D), after vanillin staining (E), and after DMACA staining (F). daf, days after flowering.

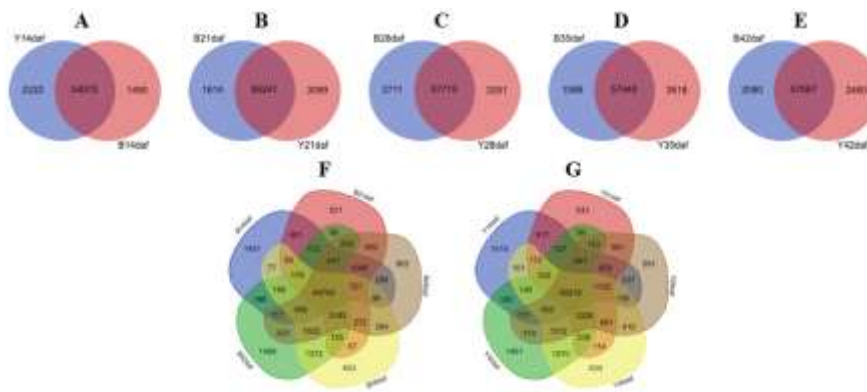

**Supplementary Figure 2.** Number of expressed genes (EGs) in B-NIL and Y-NIL during seed development. **(A-E)** Venn diagrams of expressed genes in B-NIL and Y-NIL at each developmental stage (14, 21, 28, 35, and 42 daf). **(F, G)** Venn diagrams of expressed genes of five stages for B-NIL **(F)** and Y-NIL **(G)**, respectively. EGs, Genes with more than 10 counts from the sum of three replicates in each sample.

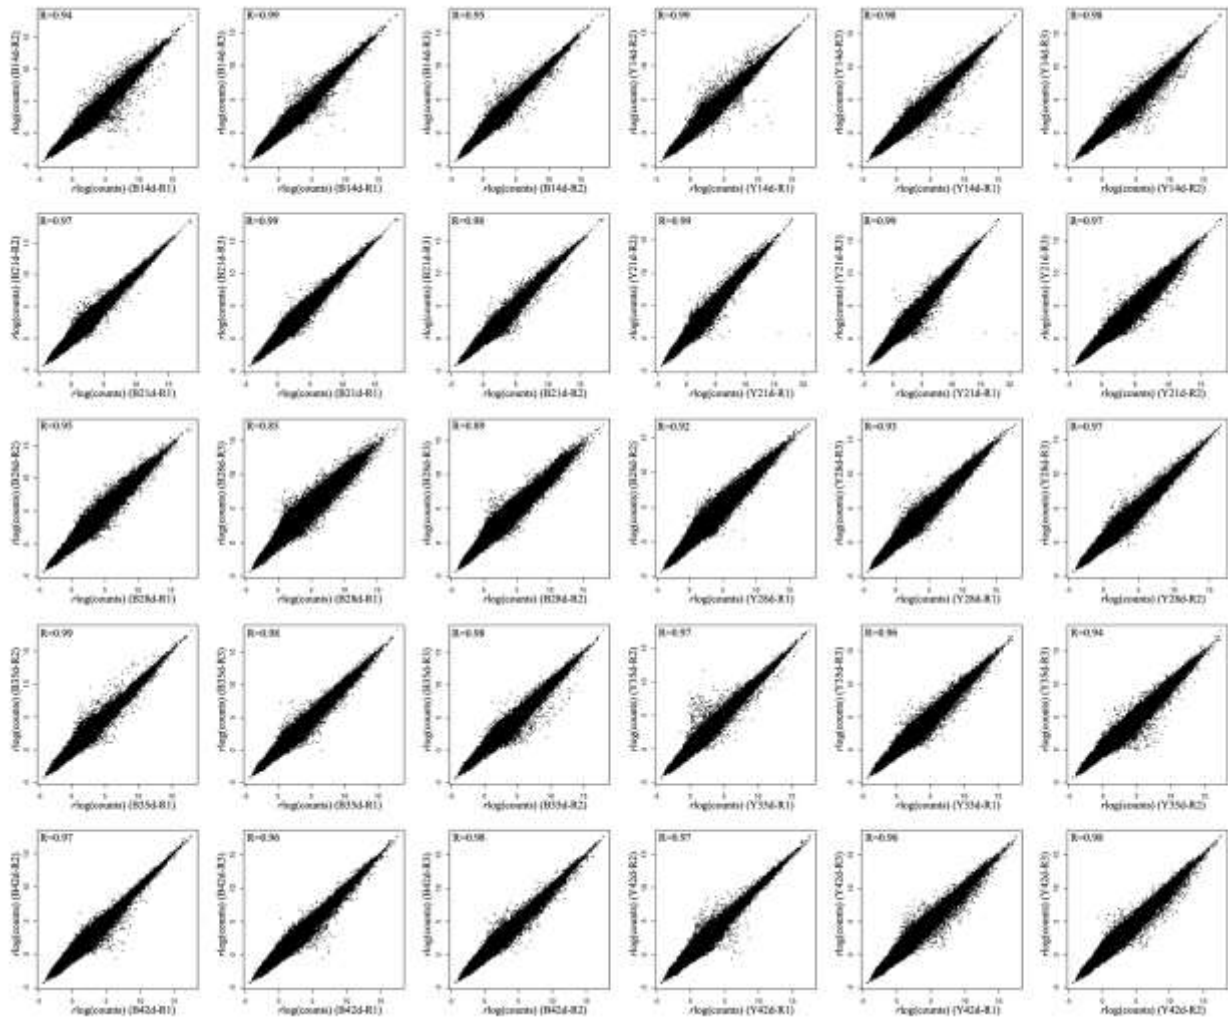

**Supplementary Figure 3.** Pearson correlation coefficients between each pair of biological replicates at different developmental stages for both B-NIL and Y-NIL based on the rlog-transformed feature counts.

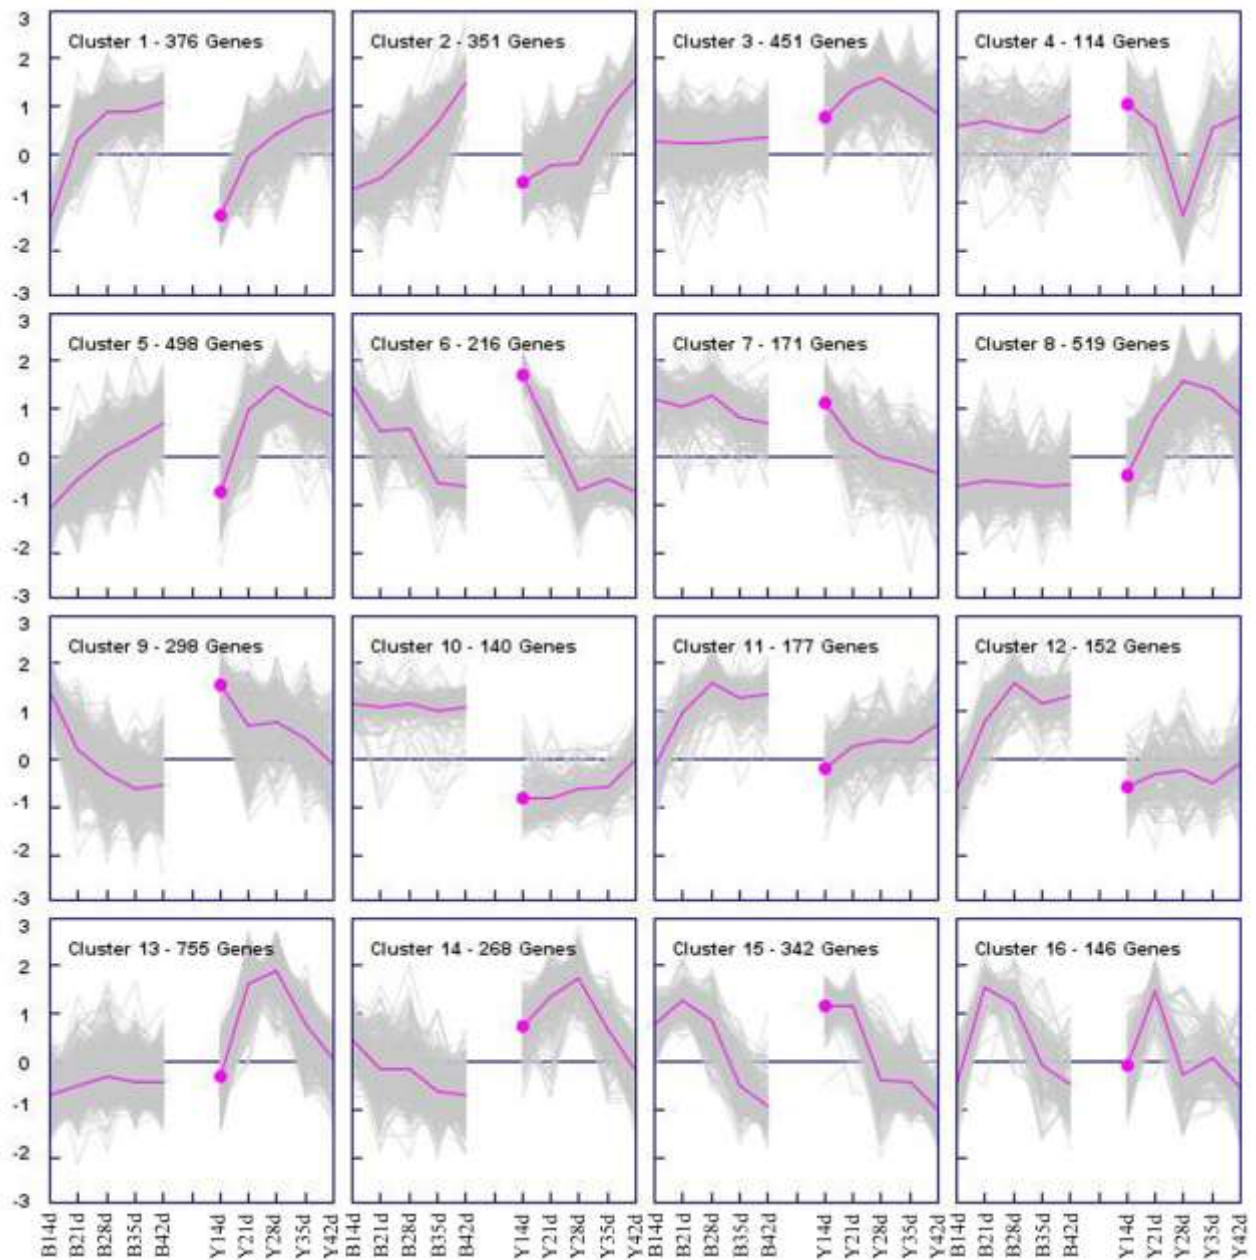

**Supplementary Figure 4.** Cluster analysis of all 4,974 DEGs. DEGs were classified to 16 clusters by K-means clustering method based on normalized feature counts (y-axis) with Genesis.

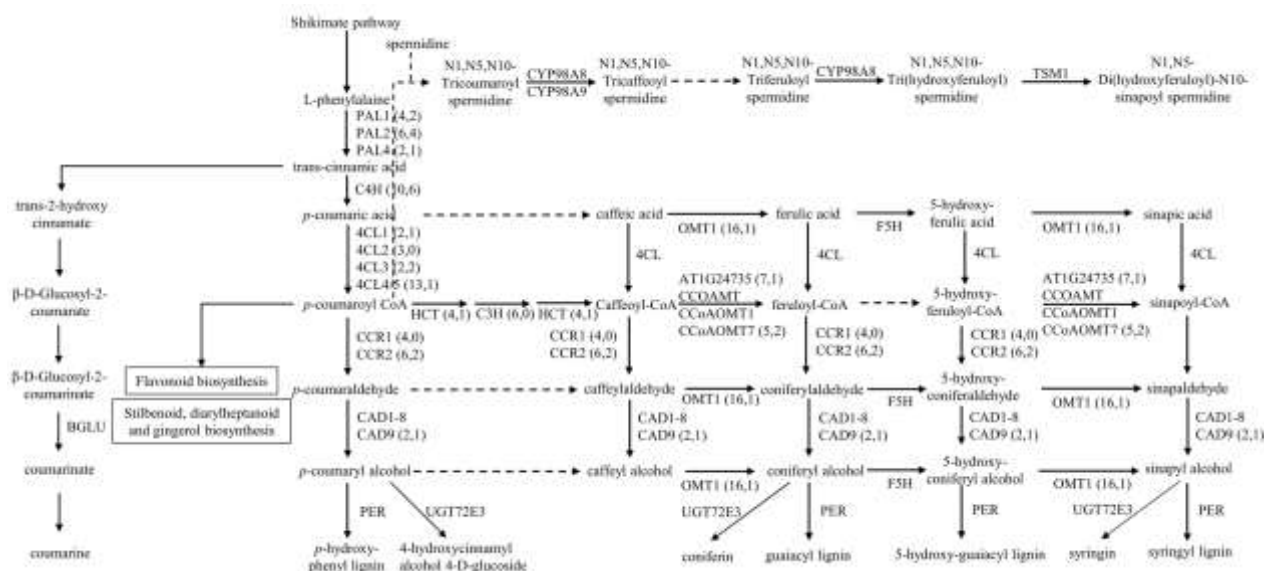

**Supplementary Figure 5.** Phenylpropanoid pathway for lignin biosynthesis containing DEGs in *B. napus* seed coats (adapted from Yu (2013)). The copy number of genes from the whole genome and from the DEGs in the present study are listed in parentheses, respectively. PAL, phenylalanine ammonia-lyase; C4H, cinnamate 4-hydroxylase; 4CL, 4-coumarate:CoA ligase; HCT, hydroxycinnamoyl-coenzyme A shikimate: quinate hydroxy-cinnamoyl-transferase; C3'H, 4-coumarate 3'-hydroxylase; CYP98A8, cytochrome P450, Family 98, Subfamily A; OMT1, O-methyltransferase 1; CCoAOMT, caffeoyl-CoA 3-o-methyltransferase; CCoAOMT7, caffeoyl coenzyme A O-methyltransferase; F5H, ferulate-5-hydroxylase; CCR, cinnamoyl-CoA reductase; CAD, cinnamyl alcohol dehydrogenase; UGT72E3, UDPG: coniferyl alcohol glucosyltransferase; BGLU, beta glucosidase; PER, Peroxidase.

## 2.2 Supplementary Table

**Supplementary Table 1.** Fatty acid (FA) profile (% composition) in mature seeds of four *B. napus* lines. FA composition content is presented as percentage content as proportion of total FA from GC analysis. FA content is presented as percentage content in dry seeds (% DW). Oil and protein contents are presented as percentage contents in dry seeds (% DW) from NIRS. Values are means  $\pm$  SE of three biological repeats for parents and five biological repeats for NILs.

|                        | 94570              | No. 2127-17        | B-NIL              | Y-NIL              |
|------------------------|--------------------|--------------------|--------------------|--------------------|
| Palmitic               | 5.56 $\pm$ 0.001a  | 4.75 $\pm$ 0.002ab | 5.64 $\pm$ 0.002b  | 5.16 $\pm$ 0.002   |
| Stearic                | 2.75 $\pm$ 0.001a  | 1.73 $\pm$ 0.001ab | 2.66 $\pm$ 0.002b  | 2.29 $\pm$ 0.002   |
| Oleic                  | 63.23 $\pm$ 0.007a | 18.44 $\pm$ 0.003a | 19.98 $\pm$ 0.005a | 20.28 $\pm$ 0.003a |
| Linoleic               | 18.26 $\pm$ 0.003  | 19.68 $\pm$ 0.003  | 20.08 $\pm$ 0.006a | 18.36 $\pm$ 0.003a |
| Linolenic              | 8.7 $\pm$ 0.002a   | 11.87 $\pm$ 0.004a | 10.92 $\pm$ 0.003a | 11.44 $\pm$ 0.002a |
| Eicosenoic             | ND                 | 12.39 $\pm$ 0.004a | 13.23 $\pm$ 0.003  | 13.86 $\pm$ 0.003a |
| Erucic                 | ND                 | 27 $\pm$ 0.006     | 25.48 $\pm$ 0.005  | 27.01 $\pm$ 0.003  |
| FA content (% DW)      | 44.59 $\pm$ 0.01ab | 39.26 $\pm$ 0.00ac | 35.91 $\pm$ 0.00bd | 43.60 $\pm$ 0.00cd |
| Oil content (% DW)     | 41.60 $\pm$ 0.35a  | 39.21 $\pm$ 1.11   | 37.36 $\pm$ 0.52ab | 41.50 $\pm$ 0.81b  |
| Protein content (% DW) | 28.48 $\pm$ 0.49   | 28.21 $\pm$ 1.23   | 28.38 $\pm$ 0.54   | 28.10 $\pm$ 1.13   |

<sup>a</sup> Different lowercase letters indicates significant difference at the  $P < 0.05$  in a *t*-test.

**Supplementary Table 2.** Summary statistics of RNA-seq reads and mapped reads.

| <b>Sample NO.<sup>a</sup></b> | <b>No. of Raw reads</b> | <b>No. of Clean reads</b> | <b>Percent of Mapped reads<sup>b</sup></b> | <b>Percent of Uniquely mapped reads<sup>c</sup></b> | <b>Percent of Properly paired reads<sup>b</sup></b> |
|-------------------------------|-------------------------|---------------------------|--------------------------------------------|-----------------------------------------------------|-----------------------------------------------------|
| B14d-R1                       | 50,034,118              | 50,023,134                | 86.59%                                     | 78.46%                                              | 69.71%                                              |
| B14d-R2                       | 73,215,200              | 73,197,044                | 84.18%                                     | 79.30%                                              | 65.79%                                              |
| B14d-R3                       | 43,068,266              | 43,061,802                | 86.15%                                     | 79.98%                                              | 69.80%                                              |
| Y14d-R1                       | 46,055,388              | 46,047,762                | 85.52%                                     | 80.13%                                              | 68.17%                                              |
| Y14d-R2                       | 55,236,996              | 55,216,088                | 83.15%                                     | 79.69%                                              | 64.92%                                              |
| Y14d-R3                       | 52,617,650              | 52,598,848                | 82.15%                                     | 80.72%                                              | 64.09%                                              |
| B21d-R1                       | 51,584,118              | 51,570,738                | 85.88%                                     | 79.34%                                              | 68.17%                                              |
| B21d-R2                       | 75,894,192              | 75,887,146                | 86.30%                                     | 80.81%                                              | 69.37%                                              |
| B21d-R3                       | 49,274,242              | 49,270,304                | 83.46%                                     | 82.07%                                              | 65.57%                                              |
| Y21d-R1                       | 48,639,404              | 48,633,740                | 85.79%                                     | 80.11%                                              | 68.07%                                              |
| Y21d-R2                       | 72,198,024              | 72,189,694                | 84.21%                                     | 80.53%                                              | 66.15%                                              |
| Y21d-R3                       | 62,312,324              | 62,301,528                | 82.57%                                     | 81.23%                                              | 64.55%                                              |
| B28d-R1                       | 51,826,640              | 51,812,730                | 82.41%                                     | 80.93%                                              | 64.73%                                              |
| B28d-R2                       | 62,519,596              | 62,507,548                | 81.30%                                     | 81.85%                                              | 63.27%                                              |
| B28d-R3                       | 54,378,064              | 54,368,498                | 83.34%                                     | 79.67%                                              | 66.58%                                              |
| Y28d-R1                       | 50,932,754              | 50,921,570                | 78.29%                                     | 81.74%                                              | 60.73%                                              |
| Y28d-R2                       | 68,581,712              | 68,572,206                | 78.90%                                     | 79.81%                                              | 60.73%                                              |
| Y28d-R3                       | 56,707,254              | 56,693,710                | 76.22%                                     | 80.77%                                              | 59.14%                                              |
| B35d-R1                       | 65,653,656              | 65,649,022                | 85.43%                                     | 75.92%                                              | 62.91%                                              |
| B35d-R2                       | 43,683,112              | 43,680,394                | 82.70%                                     | 81.01%                                              | 64.61%                                              |
| B35d-R3                       | 51,582,474              | 51,579,070                | 81.90%                                     | 81.29%                                              | 63.45%                                              |
| Y35d-R1                       | 61,880,872              | 61,875,512                | 83.17%                                     | 79.32%                                              | 64.26%                                              |
| Y35d-R2                       | 100,316,688             | 100,310,254               | 83.50%                                     | 80.52%                                              | 65.25%                                              |
| Y35d-R3                       | 52,007,020              | 52,003,094                | 82.36%                                     | 80.80%                                              | 64.26%                                              |
| B42d-R1                       | 47,870,940              | 47,844,452                | 77.41%                                     | 77.93%                                              | 59.53%                                              |
| B42d-R2                       | 66,974,066              | 66,964,418                | 81.39%                                     | 77.01%                                              | 61.06%                                              |
| B42d-R3                       | 65,652,928              | 65,645,534                | 80.58%                                     | 78.10%                                              | 60.27%                                              |
| Y42d-R1                       | 53,601,138              | 53,595,118                | 83.04%                                     | 77.31%                                              | 62.88%                                              |
| Y42d-R2                       | 61,128,968              | 61,122,232                | 84.13%                                     | 73.21%                                              | 60.59%                                              |
| Y42d-R3                       | 75,683,940              | 75,675,696                | 81.20%                                     | 78.39%                                              | 60.74%                                              |
| Total                         | 1,771,111,744           | 1,770,818,886             |                                            |                                                     |                                                     |
| Average                       | 59,037,058              | 59,027,296                | 82.77%                                     | 79.60%                                              | 64.31%                                              |

<sup>a</sup> B, B-NIL; Y, Y-NIL; R1, R2 and R3, three biological replicates.<sup>b</sup> Percent of reads in clean reads.<sup>c</sup> Percent of reads in mapped reads.
