# Supplementary material for: Transcriptomic Analysis of Seed Coats in Yellow-Seeded Brassica napus Reveals Novel Genes That Influence Proanthocyanidin Biosynthesis
Source: Front Plant Sci. 2017 Oct 5;8:1674. doi: 10.3389/fpls.2017.01674 (PMC5633857; doi:10.3389/fpls.2017.01674)
Supplement: Supplementary file 3 [file DataSheet3.XLSX]

## Sheet: GO enrichment analysis
Supplementary File 3. Enriched GO terms of DEGs during seed development using Blast2GO. Three major functional categories were grouped: biological process (P), cellular component (C), and molecular function (F).
Up-DEGs
GO ID	GO Term	GO Type	FDR	Single Test P-Value	No. of DEGs associated with GO term	No. of genes of reference genome	% of 2806 annotated up-DEGs	% of 78080 ref genes	Sequence Names
GO:0010200	response to chitin	P	2.1e-159	2.5e-163	406	1955	0.14469	0.0250384	BnaA01g12590D, BnaA06g27060D, BnaC09g03400D, BnaA06g33520D, BnaC04g01980D, BnaA04g25900D, BnaA09g40090D, BnaCnng04580D, BnaC05g43850D, BnaA02g27290D, BnaC03g58590D, BnaC04g25500D, BnaC07g16940D, BnaCnng57040D, BnaC04g45010D, BnaC08g48630D, BnaC08g48860D, BnaAnng07270D, BnaC02g42100D, BnaA05g28580D, BnaA08g11220D, BnaC02g40040D, BnaC09g07240D, BnaC07g13550D, BnaC06g21740D, BnaC06g43540D, BnaA09g26…
GO:0010243	response to organonitrogen compound	P	1.5e-155	3.6e-159	411	2073	0.146472	0.0265497	BnaA01g12590D, BnaA06g27060D, BnaC09g03400D, BnaA06g33520D, BnaC04g01980D, BnaA04g25900D, BnaA09g40090D, BnaCnng04580D, BnaC05g43850D, BnaA02g27290D, BnaC03g58590D, BnaC04g25500D, BnaC07g16940D, BnaCnng57040D, BnaC04g45010D, BnaC08g48630D, BnaC08g48860D, BnaAnng07270D, BnaC02g42100D, BnaA05g28580D, BnaA08g11220D, BnaC02g40040D, BnaC09g07240D, BnaC07g13550D, BnaC06g21740D, BnaC06g43540D, BnaA09g26…
GO:1901698	response to nitrogen compound	P	4.8e-116	1.7e-119	481	3790	0.171418	0.04854	BnaA01g12590D, BnaC08g41620D, BnaA06g27060D, BnaC09g03400D, BnaA06g33520D, BnaA09g24500D, BnaC04g01980D, BnaA04g25900D, BnaA09g40090D, BnaCnng04580D, BnaC05g43850D, BnaA02g27290D, BnaC04g46100D, BnaC03g58590D, BnaA03g27520D, BnaC04g25500D, BnaA04g29630D, BnaC07g16940D, BnaCnng57040D, BnaC04g45010D, BnaC08g48630D, BnaC06g06610D, BnaC08g48860D, BnaAnng07270D, BnaC02g42100D, BnaA05g28580D, BnaA08g11…
GO:1901700	response to oxygen-containing compound	P	6.9e-95	3.3e-98	859	11421	0.30613	0.146273	BnaC05g17200D, BnaC08g41620D, BnaA09g32960D, BnaA06g27060D, BnaA02g23680D, BnaC09g03400D, BnaAnng28960D, BnaA06g33520D, BnaA04g25900D, BnaA02g30130D, BnaAnng05950D, BnaC08g10960D, BnaCnng28450D, BnaA02g27290D, BnaA06g10400D, BnaC03g58590D, BnaA03g27520D, BnaC04g25500D, BnaC07g16940D, BnaC08g46320D, BnaA01g01730D, BnaCnng57040D, BnaC08g48630D, BnaCnng49280D, BnaAnng07270D, BnaC08g01410D, BnaA05g28…
GO:0009719	response to endogenous stimulus	P	1.7e-86	1e-89	713	8912	0.254098	0.114139	BnaA03g57660D, BnaC05g17200D, BnaA01g12590D, BnaC08g41620D, BnaA09g32960D, BnaA06g27060D, BnaA03g19860D, BnaA02g23680D, BnaC09g03400D, BnaAnng28960D, BnaA06g33520D, BnaC02g21400D, BnaC04g01980D, BnaA04g25900D, BnaC09g34640D, BnaA04g26230D, BnaA09g40090D, BnaCnng04580D, BnaC05g43850D, BnaAnng05950D, BnaC08g10960D, BnaA02g27290D, BnaC03g58590D, BnaC04g25500D, BnaC03g23850D, BnaC07g16940D, BnaC08g46…
GO:0042221	response to chemical	P	8.1e-73	5.7e-76	1067	17397	0.380257	0.22281	BnaA03g57660D, BnaC05g17200D, BnaC08g41620D, BnaA09g32960D, BnaA06g27060D, BnaA02g23680D, BnaC09g03400D, BnaAnng28960D, BnaA06g33520D, BnaA09g24500D, BnaA04g25900D, BnaC08g40640D, BnaA02g30130D, BnaAnng05950D, BnaC08g10960D, BnaCnng28450D, BnaA02g27290D, BnaA06g10400D, BnaC03g58590D, BnaA03g27520D, BnaC04g25500D, BnaC07g16940D, BnaC08g46320D, BnaA01g01730D, BnaCnng57040D, BnaC08g48630D, BnaCnng49…
GO:0006952	defense response	P	1.2e-72	9.7e-76	600	7399	0.213828	0.0947618	BnaA01g12590D, BnaA06g27060D, BnaA02g23680D, BnaC09g03400D, BnaC09g22150D, BnaA09g24500D, BnaA02g20700D, BnaA04g25900D, BnaC09g34640D, BnaC05g43850D, BnaCnng28450D, BnaC09g28710D, BnaC02g08030D, BnaA02g27290D, BnaA07g34770D, BnaA06g10400D, BnaC03g58590D, BnaA03g27520D, BnaC02g32260D, BnaA01g01730D, BnaCnng57040D, BnaC04g45010D, BnaC08g48630D, BnaC02g42100D, BnaA01g00520D, BnaA05g28580D, BnaA08g11…
GO:0010033	response to organic substance	P	3.8e-71	3.6e-74	866	12975	0.308624	0.166176	BnaA03g57660D, BnaC05g17200D, BnaC08g41620D, BnaA09g32960D, BnaA06g27060D, BnaA02g23680D, BnaC09g03400D, BnaAnng28960D, BnaA06g33520D, BnaA09g24500D, BnaA04g25900D, BnaAnng05950D, BnaC08g10960D, BnaCnng28450D, BnaA02g27290D, BnaA06g10400D, BnaC03g58590D, BnaA03g27520D, BnaC04g25500D, BnaC07g16940D, BnaC08g46320D, BnaA01g01730D, BnaCnng57040D, BnaC08g48630D, BnaAnng07270D, BnaC08g01410D, BnaA05g28…
GO:0009620	response to fungus	P	2.1e-68	2.2e-71	317	2655	0.112972	0.0340036	BnaAnng23990D, BnaC09g50030D, BnaA01g12590D, BnaC04g42220D, BnaA02g23680D, BnaC09g03400D, BnaA10g28450D, BnaAnng05950D, BnaCnng28450D, BnaC06g22690D, BnaA02g27290D, BnaC08g36980D, BnaA02g34120D, BnaA03g27250D, BnaC08g28520D, BnaA06g23600D, BnaC03g58590D, BnaA03g27520D, BnaA06g35100D, BnaCnng57040D, BnaC04g45010D, BnaC08g48630D, BnaC02g42100D, BnaC05g51350D, BnaA01g00520D, BnaA05g28580D, BnaA08g11…
GO:0006950	response to stress	P	8.9e-66	1.1e-68	1076	18162	0.383464	0.232608	BnaC05g17200D, BnaA08g11570D, BnaC08g41620D, BnaA03g08120D, BnaA06g27060D, BnaA02g23680D, BnaC09g03400D, BnaAnng28960D, BnaA09g24500D, BnaA02g20700D, BnaA08g02130D, BnaA04g25900D, BnaA02g30130D, BnaAnng05950D, BnaC08g10960D, BnaCnng28450D, BnaC06g24380D, BnaA02g27290D, BnaA07g34770D, BnaA06g10400D, BnaC03g58590D, BnaA03g27520D, BnaA05g00520D, BnaC07g16940D, BnaC02g32260D, BnaC08g46320D, BnaA01g01…
GO:0009605	response to external stimulus	P	1.3e-65	1.7e-68	715	10101	0.254811	0.129367	BnaA01g12590D, BnaA06g27060D, BnaA02g23680D, BnaC09g03400D, BnaC09g22150D, BnaA09g24500D, BnaC09g34640D, BnaA09g40090D, BnaA02g30130D, BnaAnng05950D, BnaCnng28450D, BnaC09g28710D, BnaA02g27290D, BnaC04g46100D, BnaA06g10400D, BnaC03g58590D, BnaA03g27520D, BnaA04g29630D, BnaC07g16940D, BnaC02g32260D, BnaC08g46320D, BnaCnng57040D, BnaC04g45010D, BnaC08g48630D, BnaC08g01410D, BnaC02g42100D, BnaA01g00…
GO:0043207	response to external biotic stimulus	P	3.9e-61	6.4e-64	553	7085	0.197078	0.0907403	BnaA01g12590D, BnaA06g27060D, BnaA02g23680D, BnaC09g03400D, BnaC09g22150D, BnaA09g24500D, BnaC09g34640D, BnaAnng05950D, BnaCnng28450D, BnaC09g28710D, BnaA02g27290D, BnaA06g10400D, BnaC03g58590D, BnaA03g27520D, BnaC02g32260D, BnaCnng57040D, BnaC04g45010D, BnaC08g48630D, BnaC02g42100D, BnaA01g00520D, BnaA05g28580D, BnaA08g11220D, BnaC02g40040D, BnaC03g03480D, BnaCnng68550D, BnaA09g26390D, BnaA05g10…
GO:0051707	response to other organism	P	3.9e-61	6.4e-64	553	7085	0.197078	0.0907403	BnaA01g12590D, BnaA06g27060D, BnaA02g23680D, BnaC09g03400D, BnaC09g22150D, BnaA09g24500D, BnaC09g34640D, BnaAnng05950D, BnaCnng28450D, BnaC09g28710D, BnaA02g27290D, BnaA06g10400D, BnaC03g58590D, BnaA03g27520D, BnaC02g32260D, BnaCnng57040D, BnaC04g45010D, BnaC08g48630D, BnaC02g42100D, BnaA01g00520D, BnaA05g28580D, BnaA08g11220D, BnaC02g40040D, BnaC03g03480D, BnaCnng68550D, BnaA09g26390D, BnaA05g10…
GO:0009607	response to biotic stimulus	P	3.9e-61	6.5e-64	558	7183	0.19886	0.0919954	BnaA01g12590D, BnaA06g27060D, BnaA02g23680D, BnaC09g03400D, BnaC09g22150D, BnaA09g24500D, BnaA02g20700D, BnaC09g34640D, BnaAnng05950D, BnaCnng28450D, BnaC09g28710D, BnaA02g27290D, BnaA06g10400D, BnaC03g58590D, BnaA03g27520D, BnaC02g32260D, BnaCnng57040D, BnaC04g45010D, BnaC08g48630D, BnaC02g42100D, BnaA01g00520D, BnaA05g28580D, BnaA08g11220D, BnaC02g40040D, BnaC03g03480D, BnaCnng68550D, BnaA09g26…
GO:0050896	response to stimulus	P	2.2e-60	3.9e-63	1473	28618	0.524947	0.366522	BnaA03g57660D, BnaC05g17200D, BnaA08g11570D, BnaC08g41620D, BnaC06g12880D, BnaA09g32960D, BnaA03g08120D, BnaA06g27060D, BnaA02g23680D, BnaC09g03400D, BnaAnng28960D, BnaA06g33520D, BnaA09g24500D, BnaA02g20700D, BnaA08g02130D, BnaA10g17550D, BnaA04g25900D, BnaC08g40640D, BnaA02g30130D, BnaAnng05950D, BnaC08g10960D, BnaCnng28450D, BnaC06g24380D, BnaA02g27290D, BnaA07g34770D, BnaA06g10400D, BnaC03g58…
GO:0001101	response to acid chemical	P	7.5e-55	1.4e-57	581	7995	0.207056	0.102395	BnaC05g17200D, BnaC08g41620D, BnaA06g27060D, BnaA02g23680D, BnaC09g03400D, BnaAnng28960D, BnaC09g22150D, BnaA04g25900D, BnaC09g34640D, BnaA02g30130D, BnaCnng04580D, BnaC05g43850D, BnaAnng05950D, BnaC08g10960D, BnaCnng28450D, BnaA02g27290D, BnaC04g46100D, BnaA06g10400D, BnaC03g58590D, BnaA03g27520D, BnaA04g29630D, BnaC07g16940D, BnaC08g46320D, BnaCnng57040D, BnaC04g45010D, BnaC08g48630D, BnaCnng49…
GO:0050832	defense response to fungus	P	1.2e-54	2.3e-57	238	1881	0.0848182	0.0240907	BnaAnng23990D, BnaC09g50030D, BnaA01g12590D, BnaC04g42220D, BnaA02g23680D, BnaC09g03400D, BnaA10g28450D, BnaCnng28450D, BnaA02g27290D, BnaC08g36980D, BnaA02g34120D, BnaA03g27250D, BnaC08g28520D, BnaA06g23600D, BnaC03g58590D, BnaA03g27520D, BnaA06g35100D, BnaCnng57040D, BnaC04g45010D, BnaC08g48630D, BnaC02g42100D, BnaC05g51350D, BnaA01g00520D, BnaA05g28580D, BnaA08g11220D, BnaC02g40040D, BnaC02g16…
GO:0002376	immune system process	P	1.2e-54	2.6e-57	411	4731	0.146472	0.0605917	BnaA01g12590D, BnaA06g27060D, BnaC09g03400D, BnaA09g24500D, BnaA04g25900D, BnaC09g34640D, BnaC05g43850D, BnaCnng28450D, BnaC09g28710D, BnaA02g27290D, BnaC03g58590D, BnaA03g27520D, BnaA01g01730D, BnaC04g45010D, BnaC02g42100D, BnaA01g00520D, BnaA05g28580D, BnaA08g11220D, BnaC02g40040D, BnaC03g03480D, BnaC06g21740D, BnaC06g43540D, BnaA05g10930D, BnaC04g56750D, BnaA06g14360D, BnaA05g29310D, BnaCnng43…
GO:0009611	response to wounding	P	1.4e-54	3.2e-57	225	1700	0.0801853	0.0217725	BnaAnng23990D, BnaC08g36370D, BnaA06g18840D, BnaA01g12590D, BnaC08g41620D, BnaAnng22550D, BnaC05g33170D, BnaAnng05950D, BnaC02g22230D, BnaC06g22690D, BnaA09g30920D, BnaC08g36980D, BnaA06g38950D, BnaC08g28520D, BnaC02g04270D, BnaA09g48570D, BnaC06g31430D, BnaC07g16940D, BnaA02g35330D, BnaC02g42100D, BnaA05g28580D, BnaC02g30500D, BnaC06g43540D, BnaA06g12890D, BnaA09g26390D, BnaC06g39770D, BnaC09g11…
GO:0045730	respiratory burst	P	2.4e-54	6.1e-57	130	552	0.0463293	0.00706967	BnaAnng23990D, BnaA02g12360D, BnaC02g26030D, BnaC03g47460D, BnaA06g27060D, BnaC05g21480D, BnaA08g04620D, BnaC07g20040D, BnaA04g25900D, BnaC05g33170D, BnaC03g54940D, BnaA08g08310D, BnaA09g30920D, BnaC03g22460D, BnaC08g45390D, BnaA03g27250D, BnaA06g38950D, BnaA06g23600D, BnaC03g58590D, BnaC04g28220D, BnaC06g31430D, BnaC04g45010D, BnaA10g12460D, BnaC02g42100D, BnaC04g06800D, BnaC04g53270D, BnaA05g28…
GO:0002679	respiratory burst involved in defense response	P	2.4e-54	6.1e-57	130	552	0.0463293	0.00706967	BnaAnng23990D, BnaA02g12360D, BnaC02g26030D, BnaC03g47460D, BnaA06g27060D, BnaC05g21480D, BnaA08g04620D, BnaC07g20040D, BnaA04g25900D, BnaC05g33170D, BnaC03g54940D, BnaA08g08310D, BnaA09g30920D, BnaC03g22460D, BnaC08g45390D, BnaA03g27250D, BnaA06g38950D, BnaA06g23600D, BnaC03g58590D, BnaC04g28220D, BnaC06g31430D, BnaC04g45010D, BnaA10g12460D, BnaC02g42100D, BnaC04g06800D, BnaC04g53270D, BnaA05g28…
GO:0009612	response to mechanical stimulus	P	5.9e-54	1.5e-56	91	224	0.0324305	0.00286885	BnaAnng23990D, BnaA08g11360D, BnaC02g26030D, BnaA04g00840D, BnaA10g08320D, BnaCnng62600D, BnaC05g21480D, BnaA01g06620D, BnaA04g05850D, BnaA07g20110D, BnaC03g23130D, BnaA04g02760D, BnaA10g11500D, BnaC08g18280D, BnaAnng22550D, BnaA09g40090D, BnaC03g27140D, BnaA09g40070D, BnaC03g54940D, BnaA06g17960D, BnaA09g30920D, BnaC03g22460D, BnaC08g36980D, BnaA02g35250D, BnaC01g07950D, BnaA01g16310D, BnaA03g23…
GO:0009753	response to jasmonic acid	P	4e-53	1.1e-55	277	2517	0.098717	0.0322362	BnaAnng23990D, BnaC05g17200D, BnaC09g03400D, BnaAnng28960D, BnaA10g28450D, BnaA04g25900D, BnaC05g33170D, BnaC05g43850D, BnaAnng05950D, BnaC06g22690D, BnaA08g08310D, BnaA02g27290D, BnaC08g36980D, BnaA03g27250D, BnaC08g28520D, BnaC03g58590D, BnaA06g35100D, BnaC04g45010D, BnaC08g48630D, BnaC02g42100D, BnaC02g40040D, BnaC03g03480D, BnaC02g16640D, BnaA09g26390D, BnaA04g21040D, BnaC06g39770D, BnaA09g14…
GO:0071229	cellular response to acid chemical	P	1e-52	2.9e-55	347	3686	0.123664	0.047208	BnaAnng23990D, BnaC08g41620D, BnaC09g03400D, BnaA10g28450D, BnaA04g25900D, BnaC05g33170D, BnaA02g30130D, BnaA06g10250D, BnaC05g43850D, BnaC08g10960D, BnaCnng28450D, BnaC02g22230D, BnaC06g22690D, BnaA08g08310D, BnaA02g27290D, BnaC08g36980D, BnaC08g38060D, BnaA03g27250D, BnaA06g38950D, BnaC08g28520D, BnaC02g04270D, BnaC03g58590D, BnaA05g35970D, BnaC08g46320D, BnaC04g45010D, BnaC08g48630D, BnaC08g01…
GO:0043449	cellular alkene metabolic process	P	4.2e-49	1.5e-51	112	446	0.0399145	0.00571209	BnaA08g21830D, BnaC09g50030D, BnaA02g12360D, BnaC02g21440D, BnaC08g41620D, BnaA01g06620D, BnaA08g04620D, BnaC07g20040D, BnaA02g35860D, BnaC03g54940D, BnaC02g22230D, BnaC03g22460D, BnaA03g27250D, BnaA06g38950D, BnaA01g31330D, BnaCnng15710D, BnaA06g22540D, BnaA05g28580D, BnaA08g11220D, BnaA03g17680D, BnaAnng39710D, BnaA09g26390D, BnaA05g10930D, BnaAnng29590D, BnaC01g15290D, BnaA02g09590D, BnaC07g15…
GO:0043450	alkene biosynthetic process	P	4.2e-49	1.5e-51	112	446	0.0399145	0.00571209	BnaA08g21830D, BnaC09g50030D, BnaA02g12360D, BnaC02g21440D, BnaC08g41620D, BnaA01g06620D, BnaA08g04620D, BnaC07g20040D, BnaA02g35860D, BnaC03g54940D, BnaC02g22230D, BnaC03g22460D, BnaA03g27250D, BnaA06g38950D, BnaA01g31330D, BnaCnng15710D, BnaA06g22540D, BnaA05g28580D, BnaA08g11220D, BnaA03g17680D, BnaAnng39710D, BnaA09g26390D, BnaA05g10930D, BnaAnng29590D, BnaC01g15290D, BnaA02g09590D, BnaC07g15…
GO:0009693	ethylene biosynthetic process	P	4.2e-49	1.5e-51	112	446	0.0399145	0.00571209	BnaA08g21830D, BnaC09g50030D, BnaA02g12360D, BnaC02g21440D, BnaC08g41620D, BnaA01g06620D, BnaA08g04620D, BnaC07g20040D, BnaA02g35860D, BnaC03g54940D, BnaC02g22230D, BnaC03g22460D, BnaA03g27250D, BnaA06g38950D, BnaA01g31330D, BnaCnng15710D, BnaA06g22540D, BnaA05g28580D, BnaA08g11220D, BnaA03g17680D, BnaAnng39710D, BnaA09g26390D, BnaA05g10930D, BnaAnng29590D, BnaC01g15290D, BnaA02g09590D, BnaC07g15…
GO:0009692	ethylene metabolic process	P	4.2e-49	1.5e-51	112	446	0.0399145	0.00571209	BnaA08g21830D, BnaC09g50030D, BnaA02g12360D, BnaC02g21440D, BnaC08g41620D, BnaA01g06620D, BnaA08g04620D, BnaC07g20040D, BnaA02g35860D, BnaC03g54940D, BnaC02g22230D, BnaC03g22460D, BnaA03g27250D, BnaA06g38950D, BnaA01g31330D, BnaCnng15710D, BnaA06g22540D, BnaA05g28580D, BnaA08g11220D, BnaA03g17680D, BnaAnng39710D, BnaA09g26390D, BnaA05g10930D, BnaAnng29590D, BnaC01g15290D, BnaA02g09590D, BnaC07g15…
GO:1900674	olefin biosynthetic process	P	4.2e-49	1.5e-51	112	446	0.0399145	0.00571209	BnaA08g21830D, BnaC09g50030D, BnaA02g12360D, BnaC02g21440D, BnaC08g41620D, BnaA01g06620D, BnaA08g04620D, BnaC07g20040D, BnaA02g35860D, BnaC03g54940D, BnaC02g22230D, BnaC03g22460D, BnaA03g27250D, BnaA06g38950D, BnaA01g31330D, BnaCnng15710D, BnaA06g22540D, BnaA05g28580D, BnaA08g11220D, BnaA03g17680D, BnaAnng39710D, BnaA09g26390D, BnaA05g10930D, BnaAnng29590D, BnaC01g15290D, BnaA02g09590D, BnaC07g15…
GO:1900673	olefin metabolic process	P	4.2e-49	1.5e-51	112	446	0.0399145	0.00571209	BnaA08g21830D, BnaC09g50030D, BnaA02g12360D, BnaC02g21440D, BnaC08g41620D, BnaA01g06620D, BnaA08g04620D, BnaC07g20040D, BnaA02g35860D, BnaC03g54940D, BnaC02g22230D, BnaC03g22460D, BnaA03g27250D, BnaA06g38950D, BnaA01g31330D, BnaCnng15710D, BnaA06g22540D, BnaA05g28580D, BnaA08g11220D, BnaA03g17680D, BnaAnng39710D, BnaA09g26390D, BnaA05g10930D, BnaAnng29590D, BnaC01g15290D, BnaA02g09590D, BnaC07g15…
GO:0007165	signal transduction	P	4.2e-49	1.5e-51	592	8596	0.210976	0.110092	BnaA01g12590D, BnaA06g27060D, BnaC09g03400D, BnaC09g22150D, BnaA10g17550D, BnaA04g25900D, BnaC09g34640D, BnaA02g30130D, BnaCnng04580D, BnaC05g43850D, BnaAnng05950D, BnaC08g10960D, BnaCnng28450D, BnaC09g28710D, BnaC02g08030D, BnaA02g27290D, BnaA07g34770D, BnaC03g58590D, BnaA03g27520D, BnaC07g16940D, BnaC02g32260D, BnaC04g45010D, BnaC08g48630D, BnaC02g42100D, BnaA05g28580D, BnaA08g11220D, BnaC02g40…
GO:0023052	signaling	P	4.3e-48	1.6e-50	602	8873	0.21454	0.11364	BnaA01g12590D, BnaA06g27060D, BnaC09g03400D, BnaC09g22150D, BnaA10g17550D, BnaA04g25900D, BnaC09g34640D, BnaA02g30130D, BnaCnng04580D, BnaC05g43850D, BnaAnng05950D, BnaC08g10960D, BnaCnng28450D, BnaC09g28710D, BnaC02g08030D, BnaA02g27290D, BnaA07g34770D, BnaC03g58590D, BnaA03g27520D, BnaC07g16940D, BnaC02g32260D, BnaC04g45010D, BnaC08g48630D, BnaC02g42100D, BnaA05g28580D, BnaA08g11220D, BnaC02g40…
GO:0044700	single organism signaling	P	7.2e-48	2.8e-50	601	8868	0.214184	0.113576	BnaA01g12590D, BnaA06g27060D, BnaC09g03400D, BnaC09g22150D, BnaA10g17550D, BnaA04g25900D, BnaC09g34640D, BnaA02g30130D, BnaCnng04580D, BnaC05g43850D, BnaAnng05950D, BnaC08g10960D, BnaCnng28450D, BnaC09g28710D, BnaC02g08030D, BnaA02g27290D, BnaA07g34770D, BnaC03g58590D, BnaA03g27520D, BnaC07g16940D, BnaC02g32260D, BnaC04g45010D, BnaC08g48630D, BnaC02g42100D, BnaA05g28580D, BnaA08g11220D, BnaC02g40…
GO:0071310	cellular response to organic substance	P	7.5e-47	3e-49	470	6257	0.167498	0.0801358	BnaA01g12590D, BnaC08g41620D, BnaA06g27060D, BnaC09g03400D, BnaA09g24500D, BnaA04g25900D, BnaCnng04580D, BnaC05g43850D, BnaAnng05950D, BnaC08g10960D, BnaCnng28450D, BnaA02g27290D, BnaC03g58590D, BnaA03g27520D, BnaC07g16940D, BnaC08g46320D, BnaC04g45010D, BnaC08g48630D, BnaC08g01410D, BnaC02g42100D, BnaA05g28580D, BnaC03g18140D, BnaC02g40040D, BnaC03g03480D, BnaA03g17680D, BnaC06g21740D, BnaC02g20…
GO:0007154	cell communication	P	2.4e-46	9.8e-49	674	10544	0.2402	0.135041	BnaA01g12590D, BnaA06g27060D, BnaC09g03400D, BnaC09g22150D, BnaA10g17550D, BnaA04g25900D, BnaC09g34640D, BnaA02g30130D, BnaCnng04580D, BnaC05g43850D, BnaAnng05950D, BnaC08g10960D, BnaCnng28450D, BnaC09g28710D, BnaC02g08030D, BnaA02g27290D, BnaA07g34770D, BnaC04g46100D, BnaC03g58590D, BnaA03g27520D, BnaA04g29630D, BnaC07g16940D, BnaC02g32260D, BnaC08g46320D, BnaC04g45010D, BnaC08g48630D, BnaC08g01…
GO:0070887	cellular response to chemical stimulus	P	5.1e-45	2.2e-47	495	6865	0.176408	0.0879226	BnaA01g12590D, BnaC08g41620D, BnaA06g27060D, BnaC09g03400D, BnaA09g24500D, BnaA04g25900D, BnaA02g30130D, BnaCnng04580D, BnaC05g43850D, BnaAnng05950D, BnaC08g10960D, BnaCnng28450D, BnaA02g27290D, BnaC03g58590D, BnaA03g27520D, BnaC07g16940D, BnaC08g46320D, BnaC04g45010D, BnaC08g48630D, BnaC08g01410D, BnaC02g42100D, BnaA01g00520D, BnaA05g28580D, BnaC03g18140D, BnaC02g40040D, BnaC03g03480D, BnaA03g17…
GO:0098542	defense response to other organism	P	4.1e-44	1.8e-46	410	5243	0.146115	0.0671491	BnaA01g12590D, BnaA06g27060D, BnaA02g23680D, BnaC09g03400D, BnaC09g22150D, BnaA09g24500D, BnaC09g34640D, BnaCnng28450D, BnaC09g28710D, BnaA02g27290D, BnaA06g10400D, BnaC03g58590D, BnaA03g27520D, BnaC02g32260D, BnaCnng57040D, BnaC04g45010D, BnaC08g48630D, BnaC02g42100D, BnaA01g00520D, BnaA05g28580D, BnaA08g11220D, BnaC02g40040D, BnaC03g03480D, BnaA05g10930D, BnaC04g56750D, BnaC04g00770D, BnaA05g29…
GO:0009751	response to salicylic acid	P	8.1e-43	3.6e-45	249	2426	0.0887384	0.0310707	BnaAnng23990D, BnaC05g17200D, BnaC09g03400D, BnaAnng28960D, BnaC09g22150D, BnaA10g28450D, BnaA04g25900D, BnaA08g28380D, BnaC05g43850D, BnaAnng05950D, BnaCnng28450D, BnaC02g22230D, BnaC06g22690D, BnaA02g27290D, BnaC08g36980D, BnaA03g27250D, BnaC08g28520D, BnaA06g10400D, BnaC03g58590D, BnaC04g45010D, BnaC08g48630D, BnaC02g42100D, BnaA05g28580D, BnaC02g40040D, BnaC03g03480D, BnaC08g01030D, BnaC02g16…
GO:0051704	multi-organism process	P	4.3e-41	2e-43	622	9809	0.221668	0.125628	BnaA01g12590D, BnaA06g27060D, BnaA02g23680D, BnaC09g03400D, BnaC09g22150D, BnaA09g24500D, BnaC09g34640D, BnaAnng05950D, BnaCnng28450D, BnaC09g28710D, BnaA02g27290D, BnaA06g10400D, BnaC03g58590D, BnaA03g27520D, BnaC02g32260D, BnaCnng57040D, BnaC04g45010D, BnaC08g48630D, BnaC02g42100D, BnaA01g00520D, BnaA05g28580D, BnaA08g11220D, BnaC02g40040D, BnaC03g03480D, BnaC08g40880D, BnaCnng68550D, BnaC03g35…
GO:0009725	response to hormone	P	2.5e-40	1.2e-42	536	8021	0.191019	0.102728	BnaA03g57660D, BnaC05g17200D, BnaC08g41620D, BnaA09g32960D, BnaA06g27060D, BnaA03g19860D, BnaA02g23680D, BnaC09g03400D, BnaAnng28960D, BnaC02g21400D, BnaA04g25900D, BnaC09g34640D, BnaA04g26230D, BnaCnng04580D, BnaC05g43850D, BnaAnng05950D, BnaC08g10960D, BnaA02g27290D, BnaC03g58590D, BnaC03g23850D, BnaC07g16940D, BnaC08g46320D, BnaC04g45010D, BnaC08g48630D, BnaC08g01410D, BnaC01g21940D, BnaC02g42…
GO:0051716	cellular response to stimulus	P	2.5e-40	1.2e-42	783	13496	0.279045	0.172848	BnaC05g17200D, BnaC08g41620D, BnaA03g08120D, BnaA06g27060D, BnaC09g03400D, BnaAnng28960D, BnaA09g24500D, BnaA10g17550D, BnaA04g25900D, BnaA02g30130D, BnaAnng05950D, BnaC08g10960D, BnaCnng28450D, BnaA02g27290D, BnaA07g34770D, BnaC03g58590D, BnaA03g27520D, BnaC07g16940D, BnaC02g32260D, BnaC08g46320D, BnaC08g48630D, BnaC08g01410D, BnaA05g28580D, BnaC03g18140D, BnaA08g11220D, BnaC02g40040D, BnaA02g30…
GO:0014070	response to organic cyclic compound	P	9.7e-40	4.8e-42	338	4113	0.120456	0.0526767	BnaAnng23990D, BnaC05g17200D, BnaA09g32960D, BnaC09g03400D, BnaAnng28960D, BnaC09g22150D, BnaA09g24500D, BnaA10g28450D, BnaA04g25900D, BnaA08g28380D, BnaC05g43850D, BnaAnng05950D, BnaCnng28450D, BnaC02g22230D, BnaC06g22690D, BnaA02g27290D, BnaC08g36980D, BnaA03g27250D, BnaC08g28520D, BnaA06g10400D, BnaC03g58590D, BnaC08g46320D, BnaC04g45010D, BnaC08g48630D, BnaC08g01410D, BnaA02g35330D, BnaC01g21…
GO:0002682	regulation of immune system process	P	1.1e-39	5.6e-42	228	2199	0.0812545	0.0281634	BnaAnng23990D, BnaC09g03400D, BnaA10g28450D, BnaAnng22550D, BnaA04g25900D, BnaC05g43850D, BnaCnng28450D, BnaC06g22690D, BnaA08g08310D, BnaA02g27290D, BnaC08g36980D, BnaA05g25330D, BnaA03g27250D, BnaC08g28520D, BnaC03g58590D, BnaA03g27520D, BnaA09g48570D, BnaC04g45010D, BnaC02g42100D, BnaA05g28580D, BnaC02g40040D, BnaC03g03480D, BnaA06g12890D, BnaA04g21040D, BnaC07g15480D, BnaA06g14360D, BnaA01g01…
GO:0071395	cellular response to jasmonic acid stimulus	P	1.1e-39	5.7e-42	178	1433	0.0634355	0.018353	BnaAnng23990D, BnaC02g26030D, BnaC07g25010D, BnaC09g03400D, BnaA05g19210D, BnaA08g04620D, BnaC07g20040D, BnaA10g28450D, BnaCnng23210D, BnaC07g16030D, BnaA04g25900D, BnaC05g43850D, BnaC06g22690D, BnaA08g08310D, BnaA02g27290D, BnaA06g31640D, BnaC08g36980D, BnaA03g27250D, BnaC08g28520D, BnaC03g58590D, BnaC04g28220D, BnaC04g45010D, BnaC08g48630D, BnaC06g23400D, BnaA03g22360D, BnaA07g22510D, BnaC02g42…
GO:0009867	jasmonic acid mediated signaling pathway	P	1.8e-39	9.8e-42	177	1425	0.0630791	0.0182505	BnaAnng23990D, BnaC02g26030D, BnaC07g25010D, BnaC09g03400D, BnaA05g19210D, BnaA08g04620D, BnaC07g20040D, BnaA10g28450D, BnaCnng23210D, BnaC07g16030D, BnaA04g25900D, BnaC05g43850D, BnaC06g22690D, BnaA08g08310D, BnaA02g27290D, BnaA06g31640D, BnaC08g36980D, BnaA03g27250D, BnaC08g28520D, BnaC03g58590D, BnaC04g28220D, BnaC04g45010D, BnaC08g48630D, BnaC06g23400D, BnaA03g22360D, BnaA07g22510D, BnaC02g42…
GO:0050776	regulation of immune response	P	3.8e-39	2.1e-41	226	2187	0.0805417	0.0280097	BnaAnng23990D, BnaC09g03400D, BnaA10g28450D, BnaAnng22550D, BnaA04g25900D, BnaC05g43850D, BnaCnng28450D, BnaC06g22690D, BnaA08g08310D, BnaA02g27290D, BnaC08g36980D, BnaA05g25330D, BnaA03g27250D, BnaC08g28520D, BnaC03g58590D, BnaA03g27520D, BnaA09g48570D, BnaC04g45010D, BnaC02g42100D, BnaA05g28580D, BnaC02g40040D, BnaC03g03480D, BnaA06g12890D, BnaA04g21040D, BnaC07g15480D, BnaA06g14360D, BnaA01g01…
GO:1901701	cellular response to oxygen-containing compound	P	4.6e-39	2.5e-41	362	4601	0.129009	0.0589267	BnaAnng23990D, BnaC08g41620D, BnaC09g03400D, BnaA10g28450D, BnaA04g25900D, BnaC05g33170D, BnaA02g30130D, BnaA06g10250D, BnaC05g43850D, BnaC08g10960D, BnaCnng28450D, BnaC02g22230D, BnaC06g22690D, BnaA08g08310D, BnaA02g27290D, BnaC08g36980D, BnaC08g38060D, BnaA03g27250D, BnaA06g38950D, BnaC08g28520D, BnaC02g04270D, BnaC03g58590D, BnaA05g35970D, BnaA09g56330D, BnaA06g35100D, BnaC08g46320D, BnaC04g45…
GO:0009626	plant-type hypersensitive response	P	4.6e-39	2.6e-41	219	2078	0.078047	0.0266137	BnaAnng23990D, BnaC09g03400D, BnaA10g28450D, BnaAnng22550D, BnaA04g25900D, BnaC05g43850D, BnaCnng28450D, BnaC06g22690D, BnaA02g27290D, BnaC08g36980D, BnaA03g27250D, BnaC08g28520D, BnaC03g58590D, BnaA03g27520D, BnaA09g48570D, BnaC04g45010D, BnaC02g42100D, BnaA05g28580D, BnaC02g40040D, BnaC03g03480D, BnaA06g12890D, BnaA04g21040D, BnaC07g15480D, BnaA06g14360D, BnaA10g01940D, BnaA09g26890D, BnaA01g01…
GO:0010363	regulation of plant-type hypersensitive response	P	5.5e-39	3.2e-41	206	1876	0.0734141	0.0240266	BnaAnng23990D, BnaC09g03400D, BnaA10g28450D, BnaAnng22550D, BnaA04g25900D, BnaC05g43850D, BnaCnng28450D, BnaC06g22690D, BnaA02g27290D, BnaC08g36980D, BnaA03g27250D, BnaC08g28520D, BnaC03g58590D, BnaA03g27520D, BnaA09g48570D, BnaC04g45010D, BnaC02g42100D, BnaA05g28580D, BnaC02g40040D, BnaC03g03480D, BnaA06g12890D, BnaA04g21040D, BnaC07g15480D, BnaA06g14360D, BnaA01g01220D, BnaA05g29310D, BnaC04g14…
GO:0034050	host programmed cell death induced by symbiont	P	6.6e-39	3.9e-41	219	2084	0.078047	0.0266906	BnaAnng23990D, BnaC09g03400D, BnaA10g28450D, BnaAnng22550D, BnaA04g25900D, BnaC05g43850D, BnaCnng28450D, BnaC06g22690D, BnaA02g27290D, BnaC08g36980D, BnaA03g27250D, BnaC08g28520D, BnaC03g58590D, BnaA03g27520D, BnaA09g48570D, BnaC04g45010D, BnaC02g42100D, BnaA05g28580D, BnaC02g40040D, BnaC03g03480D, BnaA06g12890D, BnaA04g21040D, BnaC07g15480D, BnaA06g14360D, BnaA10g01940D, BnaA09g26890D, BnaA01g01…
GO:0045088	regulation of innate immune response	P	1.2e-38	7.3e-41	224	2174	0.0798289	0.0278432	BnaAnng23990D, BnaC09g03400D, BnaA10g28450D, BnaAnng22550D, BnaA04g25900D, BnaC05g43850D, BnaCnng28450D, BnaC06g22690D, BnaA08g08310D, BnaA02g27290D, BnaC08g36980D, BnaA05g25330D, BnaA03g27250D, BnaC08g28520D, BnaC03g58590D, BnaA03g27520D, BnaA09g48570D, BnaC04g45010D, BnaC02g42100D, BnaA05g28580D, BnaC02g40040D, BnaC03g03480D, BnaA06g12890D, BnaA04g21040D, BnaC07g15480D, BnaA06g14360D, BnaA01g01…
GO:0071446	cellular response to salicylic acid stimulus	P	1.2e-38	7.7e-41	199	1780	0.0709195	0.0227971	BnaAnng23990D, BnaC09g03400D, BnaA10g28450D, BnaA04g25900D, BnaC05g43850D, BnaCnng28450D, BnaC02g22230D, BnaC06g22690D, BnaA02g27290D, BnaC08g36980D, BnaA03g27250D, BnaC08g28520D, BnaC03g58590D, BnaC04g45010D, BnaC08g48630D, BnaC02g42100D, BnaA05g28580D, BnaC02g40040D, BnaC03g03480D, BnaC02g16640D, BnaA04g21040D, BnaC07g15480D, BnaA06g14360D, BnaA10g01940D, BnaA08g24320D, BnaA01g01220D, BnaA05g29…
GO:0009863	salicylic acid mediated signaling pathway	P	4.1e-38	2.6e-40	197	1766	0.0702067	0.0226178	BnaAnng23990D, BnaC09g03400D, BnaA10g28450D, BnaA04g25900D, BnaC05g43850D, BnaCnng28450D, BnaC02g22230D, BnaC06g22690D, BnaA02g27290D, BnaC08g36980D, BnaA03g27250D, BnaC08g28520D, BnaC03g58590D, BnaC04g45010D, BnaC08g48630D, BnaC02g42100D, BnaA05g28580D, BnaC02g40040D, BnaC03g03480D, BnaC02g16640D, BnaA04g21040D, BnaC07g15480D, BnaA06g14360D, BnaA10g01940D, BnaA08g24320D, BnaA01g01220D, BnaA05g29…
GO:0043067	regulation of programmed cell death	P	5.8e-38	3.7e-40	216	2070	0.0769779	0.0265113	BnaAnng23990D, BnaA02g23680D, BnaC09g03400D, BnaA10g28450D, BnaAnng22550D, BnaA04g25900D, BnaC05g43850D, BnaCnng28450D, BnaC06g22690D, BnaA02g27290D, BnaC08g36980D, BnaA03g27250D, BnaC08g28520D, BnaC03g58590D, BnaA03g27520D, BnaA09g48570D, BnaA09g56330D, BnaC04g45010D, BnaC02g42100D, BnaA05g28580D, BnaC02g40040D, BnaC03g03480D, BnaA06g12890D, BnaA04g21040D, BnaC07g15480D, BnaA06g14360D, BnaA01g01…
GO:0080135	regulation of cellular response to stress	P	1.3e-37	8.6e-40	208	1955	0.0741269	0.0250384	BnaAnng23990D, BnaC09g03400D, BnaA10g28450D, BnaAnng22550D, BnaA04g25900D, BnaC05g43850D, BnaCnng28450D, BnaC06g22690D, BnaA02g27290D, BnaC08g36980D, BnaA03g27250D, BnaC08g28520D, BnaC03g58590D, BnaA03g27520D, BnaA09g48570D, BnaC04g45010D, BnaC02g42100D, BnaA05g28580D, BnaC02g40040D, BnaC03g03480D, BnaA06g12890D, BnaA04g21040D, BnaC07g15480D, BnaA06g14360D, BnaA01g01220D, BnaA05g29310D, BnaC04g14…
GO:0010941	regulation of cell death	P	1.8e-37	1.2e-39	218	2120	0.0776907	0.0271516	BnaAnng23990D, BnaA02g23680D, BnaC09g03400D, BnaA10g28450D, BnaAnng22550D, BnaA04g25900D, BnaC05g43850D, BnaCnng28450D, BnaC06g22690D, BnaA02g27290D, BnaC08g36980D, BnaA03g27250D, BnaC08g28520D, BnaC03g58590D, BnaA03g27520D, BnaA09g48570D, BnaA09g56330D, BnaC04g45010D, BnaC02g42100D, BnaA05g28580D, BnaC02g40040D, BnaC03g03480D, BnaA06g12890D, BnaA04g21040D, BnaC07g15480D, BnaA06g14360D, BnaA01g01…
GO:0006955	immune response	P	4.7e-37	3.2e-39	342	4333	0.121882	0.0554944	BnaAnng23990D, BnaA01g12590D, BnaA06g27060D, BnaC09g03400D, BnaA10g28450D, BnaAnng22550D, BnaA04g25900D, BnaC09g34640D, BnaC05g43850D, BnaCnng28450D, BnaC09g28710D, BnaC02g22230D, BnaC06g22690D, BnaA08g08310D, BnaA02g27290D, BnaC08g14190D, BnaC08g36980D, BnaA05g25330D, BnaA03g27250D, BnaA06g38950D, BnaC08g28520D, BnaC03g58590D, BnaA03g27520D, BnaA09g48570D, BnaC04g45010D, BnaC02g42100D, BnaA01g00…
GO:0009755	hormone-mediated signaling pathway	P	5.8e-37	4e-39	330	4112	0.117605	0.0526639	BnaAnng23990D, BnaC09g03400D, BnaCnng64790D, BnaA10g28450D, BnaC09g05320D, BnaA04g25900D, BnaC05g33170D, BnaA06g10250D, BnaCnng04580D, BnaC05g43850D, BnaC08g10960D, BnaC02g22230D, BnaC06g22690D, BnaA08g08310D, BnaA02g27290D, BnaA09g30920D, BnaC08g36980D, BnaC08g38060D, BnaA03g27250D, BnaA06g38950D, BnaC08g28520D, BnaC03g58590D, BnaA05g35970D, BnaC06g31430D, BnaC07g16940D, BnaC04g45010D, BnaC08g48…
GO:0031347	regulation of defense response	P	6.4e-37	4.5e-39	261	2865	0.093015	0.0366931	BnaAnng23990D, BnaC09g03400D, BnaA10g28450D, BnaAnng22550D, BnaA04g25900D, BnaC05g43850D, BnaCnng28450D, BnaC06g22690D, BnaA08g08310D, BnaA02g27290D, BnaC08g36980D, BnaA05g25330D, BnaA03g27250D, BnaC08g28520D, BnaC03g58590D, BnaA03g27520D, BnaA09g48570D, BnaC04g45010D, BnaC02g42100D, BnaA05g28580D, BnaC02g40040D, BnaC03g03480D, BnaA06g12890D, BnaA04g21040D, BnaC07g15480D, BnaA06g14360D, BnaC03g00…
GO:0045087	innate immune response	P	7.5e-37	5.3e-39	340	4307	0.121169	0.0551614	BnaAnng23990D, BnaA01g12590D, BnaA06g27060D, BnaC09g03400D, BnaA10g28450D, BnaAnng22550D, BnaA04g25900D, BnaC09g34640D, BnaC05g43850D, BnaCnng28450D, BnaC09g28710D, BnaC02g22230D, BnaC06g22690D, BnaA08g08310D, BnaA02g27290D, BnaC08g14190D, BnaC08g36980D, BnaA05g25330D, BnaA03g27250D, BnaA06g38950D, BnaC08g28520D, BnaC03g58590D, BnaA03g27520D, BnaA09g48570D, BnaC04g45010D, BnaC02g42100D, BnaA01g00…
GO:0035556	intracellular signal transduction	P	9e-36	6.5e-38	270	3074	0.0962224	0.0393699	BnaAnng23990D, BnaC03g47460D, BnaA06g27060D, BnaC09g03400D, BnaA10g28450D, BnaC03g23130D, BnaA10g17550D, BnaA04g25900D, BnaC05g33170D, BnaCnng04580D, BnaC05g43850D, BnaA09g49200D, BnaCnng28450D, BnaC09g28710D, BnaC02g22230D, BnaA08g08310D, BnaA02g27290D, BnaA09g30920D, BnaC08g36980D, BnaA03g27250D, BnaA06g38950D, BnaC08g28520D, BnaA06g23600D, BnaC03g58590D, BnaA05g35970D, BnaC06g31430D, BnaC04g45…
GO:0032870	cellular response to hormone stimulus	P	1.4e-35	1.1e-37	340	4377	0.121169	0.0560579	BnaAnng23990D, BnaC09g03400D, BnaCnng64790D, BnaA10g28450D, BnaC09g05320D, BnaA04g25900D, BnaC05g33170D, BnaA06g10250D, BnaCnng04580D, BnaC05g43850D, BnaC08g10960D, BnaC02g22230D, BnaC06g22690D, BnaA08g08310D, BnaA02g27290D, BnaA09g30920D, BnaC08g36980D, BnaC08g38060D, BnaA03g27250D, BnaA06g38950D, BnaC08g28520D, BnaC03g58590D, BnaA05g35970D, BnaC06g31430D, BnaC07g16940D, BnaC08g46320D, BnaC04g45…
GO:0071495	cellular response to endogenous stimulus	P	2.2e-35	1.7e-37	340	4388	0.121169	0.0561988	BnaAnng23990D, BnaC09g03400D, BnaCnng64790D, BnaA10g28450D, BnaC09g05320D, BnaA04g25900D, BnaC05g33170D, BnaA06g10250D, BnaCnng04580D, BnaC05g43850D, BnaC08g10960D, BnaC02g22230D, BnaC06g22690D, BnaA08g08310D, BnaA02g27290D, BnaA09g30920D, BnaC08g36980D, BnaC08g38060D, BnaA03g27250D, BnaA06g38950D, BnaC08g28520D, BnaC03g58590D, BnaA05g35970D, BnaC06g31430D, BnaC07g16940D, BnaC08g46320D, BnaC04g45…
GO:0012501	programmed cell death	P	2.2e-35	1.7e-37	230	2399	0.0819672	0.0307249	BnaAnng23990D, BnaA02g23680D, BnaC09g03400D, BnaA10g28450D, BnaAnng22550D, BnaA04g25900D, BnaC05g43850D, BnaCnng28450D, BnaC06g22690D, BnaA02g27290D, BnaC08g36980D, BnaA03g27250D, BnaC08g28520D, BnaC03g58590D, BnaA03g27520D, BnaA09g48570D, BnaA09g56330D, BnaC04g45010D, BnaC02g42100D, BnaA05g28580D, BnaC02g40040D, BnaC03g03480D, BnaA06g12890D, BnaA04g21040D, BnaC07g15480D, BnaA06g14360D, BnaA10g01…
GO:0006612	protein targeting to membrane	P	3.1e-35	2.4e-37	203	1960	0.072345	0.0251025	BnaAnng23990D, BnaC09g03400D, BnaA10g28450D, BnaAnng22550D, BnaA04g25900D, BnaC05g43850D, BnaCnng28450D, BnaC06g22690D, BnaA02g27290D, BnaC08g36980D, BnaA03g27250D, BnaC08g28520D, BnaC03g58590D, BnaA03g27520D, BnaA09g48570D, BnaC04g45010D, BnaC02g42100D, BnaA05g28580D, BnaC02g40040D, BnaC03g03480D, BnaA06g12890D, BnaA04g21040D, BnaC07g15480D, BnaA06g14360D, BnaA01g01220D, BnaA05g29310D, BnaC04g14…
GO:0033554	cellular response to stress	P	7.1e-35	5.6e-37	450	6617	0.160371	0.0847464	BnaC05g17200D, BnaA01g12590D, BnaC08g41620D, BnaA03g08120D, BnaA06g27060D, BnaC09g03400D, BnaA01g16730D, BnaAnng28960D, BnaA04g25900D, BnaA02g30130D, BnaC05g43850D, BnaAnng05950D, BnaCnng28450D, BnaA02g27290D, BnaC04g46100D, BnaC03g58590D, BnaA03g27520D, BnaA04g29630D, BnaC02g32260D, BnaC08g46320D, BnaC04g45010D, BnaC08g01410D, BnaC02g42100D, BnaA01g00520D, BnaA05g28580D, BnaC02g40040D, BnaA02g30…
GO:0080134	regulation of response to stress	P	9.8e-35	7.7e-37	264	3016	0.0940841	0.038627	BnaAnng23990D, BnaC09g03400D, BnaA10g28450D, BnaAnng22550D, BnaA04g25900D, BnaC05g43850D, BnaCnng28450D, BnaC06g22690D, BnaA08g08310D, BnaA02g27290D, BnaC08g36980D, BnaA05g25330D, BnaA03g27250D, BnaC08g28520D, BnaC03g58590D, BnaA03g27520D, BnaA09g48570D, BnaC04g45010D, BnaC02g42100D, BnaA05g28580D, BnaC02g40040D, BnaC03g03480D, BnaA06g12890D, BnaA04g21040D, BnaC07g15480D, BnaA06g14360D, BnaC03g00…
GO:0009408	response to heat	P	1.7e-34	1.3e-36	162	1351	0.0577334	0.0173028	BnaA10g01680D, BnaC05g17200D, BnaC07g25010D, BnaC06g33810D, BnaA02g06890D, BnaA01g16730D, BnaAnng28960D, BnaA08g04620D, BnaCnng42080D, BnaC06g38250D, BnaC07g32600D, BnaAnng13800D, BnaC05g43850D, BnaC09g01820D, BnaA09g30920D, BnaA06g31640D, BnaC08g35240D, BnaA02g35250D, BnaA03g09250D, BnaC01g13400D, BnaC02g04270D, BnaC01g09970D, BnaC06g31430D, BnaA06g12090D, BnaA02g35330D, BnaC04g06800D, BnaA04g09…
GO:0072657	protein localization to membrane	P	3.8e-34	3.1e-36	203	2000	0.072345	0.0256148	BnaAnng23990D, BnaC09g03400D, BnaA10g28450D, BnaAnng22550D, BnaA04g25900D, BnaC05g43850D, BnaCnng28450D, BnaC06g22690D, BnaA02g27290D, BnaC08g36980D, BnaA03g27250D, BnaC08g28520D, BnaC03g58590D, BnaA03g27520D, BnaA09g48570D, BnaC04g45010D, BnaC02g42100D, BnaA05g28580D, BnaC02g40040D, BnaC03g03480D, BnaA06g12890D, BnaA04g21040D, BnaC07g15480D, BnaA06g14360D, BnaA01g01220D, BnaA05g29310D, BnaC04g14…
GO:0090150	establishment of protein localization to membrane	P	3.8e-34	3.1e-36	203	2000	0.072345	0.0256148	BnaAnng23990D, BnaC09g03400D, BnaA10g28450D, BnaAnng22550D, BnaA04g25900D, BnaC05g43850D, BnaCnng28450D, BnaC06g22690D, BnaA02g27290D, BnaC08g36980D, BnaA03g27250D, BnaC08g28520D, BnaC03g58590D, BnaA03g27520D, BnaA09g48570D, BnaC04g45010D, BnaC02g42100D, BnaA05g28580D, BnaC02g40040D, BnaC03g03480D, BnaA06g12890D, BnaA04g21040D, BnaC07g15480D, BnaA06g14360D, BnaA01g01220D, BnaA05g29310D, BnaC04g14…
GO:0002252	immune effector process	P	1.3e-32	1.1e-34	151	1245	0.0538133	0.0159452	BnaAnng23990D, BnaA02g12360D, BnaC02g26030D, BnaC03g47460D, BnaC03g67380D, BnaA06g27060D, BnaC05g21480D, BnaA08g04620D, BnaA09g24500D, BnaC07g20040D, BnaA04g25900D, BnaC05g33170D, BnaC03g54940D, BnaA08g08310D, BnaA09g30920D, BnaC08g35240D, BnaC03g22460D, BnaC08g45390D, BnaA03g27250D, BnaC03g02540D, BnaA03g55320D, BnaA06g38950D, BnaA06g23600D, BnaC03g58590D, BnaC04g28220D, BnaC06g31430D, BnaC04g45…
GO:0008219	cell death	P	1.9e-32	1.6e-34	236	2626	0.0841055	0.0336322	BnaAnng23990D, BnaA02g23680D, BnaC09g03400D, BnaA02g20700D, BnaA10g28450D, BnaC02g27050D, BnaAnng22550D, BnaA04g25900D, BnaC05g43850D, BnaCnng28450D, BnaC06g22690D, BnaA02g27290D, BnaC08g36980D, BnaA03g27250D, BnaC08g28520D, BnaC03g58590D, BnaA03g27520D, BnaA09g48570D, BnaA09g56330D, BnaC04g45010D, BnaC02g42100D, BnaA05g28580D, BnaC02g40040D, BnaC03g03480D, BnaA06g12890D, BnaA04g21040D, BnaC07g15…
GO:0030968	endoplasmic reticulum unfolded protein response	P	8.1e-32	7e-34	125	900	0.0445474	0.0115266	BnaAnng23990D, BnaA01g12590D, BnaC02g26030D, BnaA06g27060D, BnaA08g04620D, BnaAnng11580D, BnaC05g43850D, BnaAnng05950D, BnaC03g22460D, BnaC08g36980D, BnaA03g09250D, BnaA03g27250D, BnaC07g25090D, BnaC08g28520D, BnaA03g27520D, BnaC04g28220D, BnaC03g34330D, BnaA01g27940D, BnaA01g12670D, BnaC02g42100D, BnaA05g28580D, BnaA01g02980D, BnaA09g20430D, BnaC09g35160D, BnaA09g53510D, BnaC07g33400D, BnaA05g29…
GO:0009697	salicylic acid biosynthetic process	P	1e-31	8.8e-34	134	1026	0.0477548	0.0131404	BnaAnng23990D, BnaC02g26030D, BnaC09g03400D, BnaA10g28450D, BnaC09g34640D, BnaCnng28450D, BnaA02g27290D, BnaC08g14190D, BnaC08g36980D, BnaA03g27250D, BnaA08g25940D, BnaC03g58590D, BnaC04g28220D, BnaC06g23400D, BnaA07g22510D, BnaC02g42100D, BnaC04g06800D, BnaC08g14030D, BnaC02g40040D, BnaA09g20430D, BnaC07g33400D, BnaA08g24320D, BnaA05g29310D, BnaA10g28460D, BnaC08g49140D, BnaC06g21240D, BnaC03g66…
GO:0006986	response to unfolded protein	P	1.2e-31	1.1e-33	125	905	0.0445474	0.0115907	BnaAnng23990D, BnaA01g12590D, BnaC02g26030D, BnaA06g27060D, BnaA08g04620D, BnaAnng11580D, BnaC05g43850D, BnaAnng05950D, BnaC03g22460D, BnaC08g36980D, BnaA03g09250D, BnaA03g27250D, BnaC07g25090D, BnaC08g28520D, BnaA03g27520D, BnaC04g28220D, BnaC03g34330D, BnaA01g27940D, BnaA01g12670D, BnaC02g42100D, BnaA05g28580D, BnaA01g02980D, BnaA09g20430D, BnaC09g35160D, BnaA09g53510D, BnaC07g33400D, BnaA05g29…
GO:0034620	cellular response to unfolded protein	P	1.2e-31	1.1e-33	125	905	0.0445474	0.0115907	BnaAnng23990D, BnaA01g12590D, BnaC02g26030D, BnaA06g27060D, BnaA08g04620D, BnaAnng11580D, BnaC05g43850D, BnaAnng05950D, BnaC03g22460D, BnaC08g36980D, BnaA03g09250D, BnaA03g27250D, BnaC07g25090D, BnaC08g28520D, BnaA03g27520D, BnaC04g28220D, BnaC03g34330D, BnaA01g27940D, BnaA01g12670D, BnaC02g42100D, BnaA05g28580D, BnaA01g02980D, BnaA09g20430D, BnaC09g35160D, BnaA09g53510D, BnaC07g33400D, BnaA05g29…
GO:0035967	cellular response to topologically incorrect protein	P	1.2e-31	1.1e-33	125	905	0.0445474	0.0115907	BnaAnng23990D, BnaA01g12590D, BnaC02g26030D, BnaA06g27060D, BnaA08g04620D, BnaAnng11580D, BnaC05g43850D, BnaAnng05950D, BnaC03g22460D, BnaC08g36980D, BnaA03g09250D, BnaA03g27250D, BnaC07g25090D, BnaC08g28520D, BnaA03g27520D, BnaC04g28220D, BnaC03g34330D, BnaA01g27940D, BnaA01g12670D, BnaC02g42100D, BnaA05g28580D, BnaA01g02980D, BnaA09g20430D, BnaC09g35160D, BnaA09g53510D, BnaC07g33400D, BnaA05g29…
GO:0046189	phenol-containing compound biosynthetic process	P	3.8e-31	3.5e-33	136	1070	0.0484676	0.0137039	BnaAnng23990D, BnaC02g26030D, BnaC09g03400D, BnaA10g28450D, BnaC09g34640D, BnaCnng28450D, BnaA02g27290D, BnaC08g14190D, BnaC08g36980D, BnaA03g27250D, BnaA08g25940D, BnaC03g58590D, BnaC04g28220D, BnaC06g23400D, BnaA07g22510D, BnaC02g42100D, BnaC04g06800D, BnaC08g14030D, BnaC02g40040D, BnaA03g58750D, BnaA09g20430D, BnaC07g33400D, BnaA08g24320D, BnaA05g29310D, BnaA10g28460D, BnaC08g49140D, BnaC06g21…
GO:0048583	regulation of response to stimulus	P	4.3e-31	4.1e-33	302	3904	0.107627	0.05	BnaAnng23990D, BnaC09g03400D, BnaCnng64790D, BnaA10g28450D, BnaC03g23130D, BnaAnng22550D, BnaA04g25900D, BnaC05g43850D, BnaCnng28450D, BnaC06g22690D, BnaA08g08310D, BnaA02g27290D, BnaC08g36980D, BnaA05g25330D, BnaA03g27250D, BnaC08g28520D, BnaC03g58590D, BnaA03g27520D, BnaA09g48570D, BnaC04g45010D, BnaC08g48630D, BnaC02g42100D, BnaA05g28580D, BnaC02g40040D, BnaC03g03480D, BnaC02g16640D, BnaA06g12…
GO:0009814	defense response, incompatible interaction	P	4.3e-30	4.1e-32	236	2734	0.0841055	0.0350154	BnaAnng23990D, BnaA01g12590D, BnaA06g27060D, BnaC09g03400D, BnaA10g28450D, BnaC09g34640D, BnaCnng28450D, BnaC09g28710D, BnaC02g22230D, BnaA02g27290D, BnaC08g14190D, BnaC08g36980D, BnaA03g27250D, BnaA06g38950D, BnaC08g28520D, BnaC03g58590D, BnaC04g45010D, BnaC02g42100D, BnaC02g40040D, BnaC03g03480D, BnaC02g43920D, BnaA04g21040D, BnaC04g56750D, BnaA09g26890D, BnaA01g01220D, BnaA05g29310D, BnaC04g14…
GO:0009723	response to ethylene	P	1.7e-29	1.7e-31	183	1848	0.0652174	0.023668	BnaAnng23990D, BnaC02g21440D, BnaC02g26030D, BnaC07g25010D, BnaC08g41620D, BnaC05g21480D, BnaA03g19860D, BnaA08g04620D, BnaC07g20040D, BnaA02g35860D, BnaA06g24500D, BnaC07g16030D, BnaA04g25900D, BnaC05g33170D, BnaA08g28380D, BnaCnng04580D, BnaC05g43850D, BnaC03g54940D, BnaC08g26870D, BnaC09g01820D, BnaC02g22230D, BnaC06g22690D, BnaA08g08310D, BnaA09g30920D, BnaA06g31640D, BnaA07g19210D, BnaC03g22…
GO:0031348	negative regulation of defense response	P	3e-29	2.9e-31	157	1440	0.0559515	0.0184426	BnaAnng23990D, BnaC02g26030D, BnaC09g03400D, BnaA08g04620D, BnaA10g28450D, BnaAnng11580D, BnaCnng28450D, BnaA02g27290D, BnaC08g36980D, BnaA03g27250D, BnaC08g28520D, BnaC03g58590D, BnaC04g28220D, BnaC04g45010D, BnaC06g23400D, BnaA07g22510D, BnaC02g42100D, BnaC04g06800D, BnaC02g40040D, BnaC03g03480D, BnaA09g20430D, BnaA04g21040D, BnaC07g33400D, BnaA08g24320D, BnaA01g01220D, BnaA05g29310D, BnaC04g14…
GO:0009696	salicylic acid metabolic process	P	3.5e-29	3.4e-31	134	1096	0.0477548	0.0140369	BnaAnng23990D, BnaC02g26030D, BnaC09g03400D, BnaA10g28450D, BnaC09g34640D, BnaCnng28450D, BnaA02g27290D, BnaC08g14190D, BnaC08g36980D, BnaA03g27250D, BnaA08g25940D, BnaC03g58590D, BnaC04g28220D, BnaC06g23400D, BnaA07g22510D, BnaC02g42100D, BnaC04g06800D, BnaC08g14030D, BnaC02g40040D, BnaA09g20430D, BnaC07g33400D, BnaA08g24320D, BnaA05g29310D, BnaA10g28460D, BnaC08g49140D, BnaC06g21240D, BnaC03g66…
GO:0009627	systemic acquired resistance	P	1.4e-28	1.4e-30	205	2257	0.0730577	0.0289063	BnaAnng23990D, BnaA01g12590D, BnaC09g03400D, BnaA10g28450D, BnaCnng28450D, BnaC02g22230D, BnaA02g27290D, BnaC08g14190D, BnaC08g36980D, BnaA03g27250D, BnaC08g28520D, BnaC03g58590D, BnaC04g45010D, BnaC02g42100D, BnaC02g40040D, BnaC03g03480D, BnaA04g21040D, BnaA01g01220D, BnaA05g29310D, BnaC04g14500D, BnaA10g28460D, BnaC06g21240D, BnaA06g35600D, BnaA03g42700D, BnaAnng31370D, BnaC03g73490D, BnaC01g39…
GO:0018958	phenol-containing compound metabolic process	P	3.3e-28	3.3e-30	136	1154	0.0484676	0.0147797	BnaAnng23990D, BnaC02g26030D, BnaC09g03400D, BnaA10g28450D, BnaC09g34640D, BnaCnng28450D, BnaA02g27290D, BnaC08g14190D, BnaC08g36980D, BnaA03g27250D, BnaA08g25940D, BnaC03g58590D, BnaC04g28220D, BnaC06g23400D, BnaA07g22510D, BnaC02g42100D, BnaC04g06800D, BnaC08g14030D, BnaC02g40040D, BnaA03g58750D, BnaA09g20430D, BnaC07g33400D, BnaA08g24320D, BnaA05g29310D, BnaA10g28460D, BnaC08g49140D, BnaC06g21…
GO:0060548	negative regulation of cell death	P	6.7e-27	6.8e-29	119	944	0.0424091	0.0120902	BnaAnng23990D, BnaC02g26030D, BnaA02g23680D, BnaC09g03400D, BnaA08g04620D, BnaA10g28450D, BnaA04g25900D, BnaC08g26870D, BnaCnng28450D, BnaC06g22690D, BnaC03g22460D, BnaC08g36980D, BnaC08g28520D, BnaC03g58590D, BnaA03g27520D, BnaC04g28220D, BnaA09g48570D, BnaC04g45010D, BnaC02g42100D, BnaC04g06800D, BnaC04g53270D, BnaA05g28580D, BnaC02g40040D, BnaA01g11230D, BnaA04g04400D, BnaA01g02980D, BnaA09g20…
GO:0043069	negative regulation of programmed cell death	P	7.5e-27	7.7e-29	117	917	0.0416964	0.0117444	BnaAnng23990D, BnaC02g26030D, BnaA02g23680D, BnaC09g03400D, BnaA08g04620D, BnaA10g28450D, BnaA04g25900D, BnaC08g26870D, BnaCnng28450D, BnaC06g22690D, BnaC03g22460D, BnaC08g36980D, BnaC08g28520D, BnaC03g58590D, BnaA03g27520D, BnaC04g28220D, BnaA09g48570D, BnaC04g45010D, BnaC02g42100D, BnaC04g06800D, BnaC04g53270D, BnaA05g28580D, BnaC02g40040D, BnaA01g11230D, BnaA04g04400D, BnaA01g02980D, BnaA09g20…
GO:0042537	benzene-containing compound metabolic process	P	5.6e-26	5.8e-28	140	1285	0.0498931	0.0164575	BnaAnng23990D, BnaC02g26030D, BnaC09g03400D, BnaA10g28450D, BnaC09g34640D, BnaCnng28450D, BnaA02g27290D, BnaC08g14190D, BnaC08g36980D, BnaA03g27250D, BnaA05g12550D, BnaA08g25940D, BnaC03g58590D, BnaC04g28220D, BnaC06g23400D, BnaA07g22510D, BnaC02g42100D, BnaC04g06800D, BnaC08g14030D, BnaC02g40040D, BnaA09g20430D, BnaC07g33400D, BnaA08g24320D, BnaA05g29310D, BnaA10g28460D, BnaC08g49140D, BnaC06g21…
GO:0071407	cellular response to organic cyclic compound	P	8.7e-26	9.2e-28	217	2600	0.0773343	0.0332992	BnaAnng23990D, BnaC09g03400D, BnaA09g24500D, BnaA10g28450D, BnaA04g25900D, BnaC05g43850D, BnaCnng28450D, BnaC02g22230D, BnaC06g22690D, BnaA02g27290D, BnaC08g36980D, BnaA03g27250D, BnaC08g28520D, BnaC03g58590D, BnaC04g45010D, BnaC08g48630D, BnaC02g42100D, BnaA05g28580D, BnaC02g40040D, BnaC03g03480D, BnaC02g16640D, BnaA04g21040D, BnaC07g15480D, BnaA01g27140D, BnaA06g14360D, BnaA10g01940D, BnaA08g24…
GO:0034976	response to endoplasmic reticulum stress	P	9.9e-26	1.1e-27	166	1713	0.0591589	0.021939	BnaAnng23990D, BnaA01g12590D, BnaC02g26030D, BnaA02g06890D, BnaA06g27060D, BnaA01g16730D, BnaA08g04620D, BnaAnng11580D, BnaC05g43850D, BnaAnng05950D, BnaC03g22460D, BnaC08g36980D, BnaA03g09250D, BnaA03g27250D, BnaC07g25090D, BnaC08g28520D, BnaC03g58590D, BnaA03g27520D, BnaC04g28220D, BnaC03g34330D, BnaA01g27940D, BnaC01g09970D, BnaA01g12670D, BnaC02g42100D, BnaA05g28580D, BnaA01g02980D, BnaA09g20…
GO:0042538	hyperosmotic salinity response	P	2.4e-25	2.6e-27	107	817	0.0381326	0.0104636	BnaC07g25010D, BnaA06g27060D, BnaC05g21480D, BnaA05g19210D, BnaA03g35670D, BnaA04g25900D, BnaC05g33170D, BnaA10g00280D, BnaC06g22690D, BnaA08g08310D, BnaC03g41510D, BnaA06g31640D, BnaA07g19210D, BnaC08g36980D, BnaA03g09250D, BnaC08g28520D, BnaC04g28220D, BnaC07g16940D, BnaC08g46320D, BnaC01g31820D, BnaC08g01410D, BnaC04g53270D, BnaC04g51510D, BnaA06g37620D, BnaC09g07240D, BnaA02g24240D, BnaC09g35…
GO:0009738	abscisic acid-activated signaling pathway	P	1.1e-24	1.2e-26	141	1346	0.0502495	0.0172387	BnaAnng23990D, BnaC02g26030D, BnaC07g25010D, BnaC08g40190D, BnaC05g21480D, BnaA08g04620D, BnaA04g25900D, BnaC05g33170D, BnaC05g43850D, BnaC08g10960D, BnaC03g54940D, BnaC08g26870D, BnaA10g00280D, BnaC06g22690D, BnaA08g08310D, BnaA06g31640D, BnaA07g19210D, BnaC08g36980D, BnaA06g38950D, BnaC08g28520D, BnaC04g28220D, BnaC01g39300D, BnaC03g34330D, BnaA05g35970D, BnaC01g31820D, BnaC04g53270D, BnaC04g51…
GO:0061024	membrane organization	P	3.9e-24	4.3e-26	223	2796	0.0794726	0.0358094	BnaAnng23990D, BnaC09g03400D, BnaA10g28450D, BnaAnng22550D, BnaA04g25900D, BnaC05g43850D, BnaCnng28450D, BnaC06g22690D, BnaA02g27290D, BnaC08g36980D, BnaA03g27250D, BnaC08g28520D, BnaC03g58590D, BnaA03g27520D, BnaA09g48570D, BnaC04g45010D, BnaC02g42100D, BnaC03g49410D, BnaA05g28580D, BnaC02g40040D, BnaC03g03480D, BnaA06g12890D, BnaA04g21040D, BnaA08g27320D, BnaC07g15480D, BnaA06g14360D, BnaA01g01…
GO:0009862	systemic acquired resistance, salicylic acid mediated signaling pathway	P	7.2e-24	7.9e-26	135	1279	0.0481112	0.0163806	BnaAnng23990D, BnaC02g26030D, BnaC09g03400D, BnaA08g04620D, BnaA10g28450D, BnaA02g35860D, BnaCnng28450D, BnaC02g22230D, BnaA02g27290D, BnaC08g36980D, BnaA03g27250D, BnaC08g28520D, BnaC03g58590D, BnaC04g28220D, BnaC04g45010D, BnaC06g23400D, BnaA07g22510D, BnaC02g42100D, BnaC04g06800D, BnaC02g40040D, BnaC03g03480D, BnaAnng13920D, BnaA09g20430D, BnaA04g21040D, BnaC07g33400D, BnaA01g01220D, BnaA05g29…
GO:0009628	response to abiotic stimulus	P	7.9e-24	8.8e-26	691	13045	0.246258	0.167072	BnaA10g01680D, BnaC05g17200D, BnaA06g18840D, BnaA08g11570D, BnaC08g41620D, BnaC06g12880D, BnaA03g08120D, BnaA06g27060D, BnaA03g19860D, BnaC09g03400D, BnaA01g16730D, BnaAnng28960D, BnaC09g22150D, BnaA08g02130D, BnaC07g32600D, BnaA04g25900D, BnaC09g34640D, BnaC08g40640D, BnaA04g26230D, BnaA09g40090D, BnaA02g30130D, BnaCnng04580D, BnaC05g43850D, BnaAnng05950D, BnaC08g10960D, BnaC06g24380D, BnaA02g27…
GO:0009415	response to water	P	1.5e-23	1.7e-25	187	2170	0.0666429	0.027792	BnaC07g25010D, BnaC04g42220D, BnaC08g40190D, BnaA06g27060D, BnaC05g21480D, BnaA05g19210D, BnaA03g35670D, BnaC07g16030D, BnaA04g25900D, BnaC05g33170D, BnaA02g30130D, BnaC08g10960D, BnaA10g00280D, BnaC06g22690D, BnaA08g08310D, BnaC03g41510D, BnaA06g31640D, BnaA07g19210D, BnaC08g36980D, BnaA03g09250D, BnaC08g28520D, BnaC02g04270D, BnaC04g28220D, BnaC07g16940D, BnaC08g46320D, BnaCnng57040D, BnaC01g31…
GO:0071215	cellular response to abscisic acid stimulus	P	1.9e-23	2.2e-25	145	1456	0.051675	0.0186475	BnaAnng23990D, BnaC02g26030D, BnaC07g25010D, BnaC08g40190D, BnaC05g21480D, BnaA08g04620D, BnaA04g25900D, BnaC05g33170D, BnaC05g43850D, BnaC08g10960D, BnaC03g54940D, BnaC08g26870D, BnaA10g00280D, BnaC06g22690D, BnaA08g08310D, BnaA06g31640D, BnaA07g19210D, BnaC08g36980D, BnaA06g38950D, BnaC08g28520D, BnaC04g28220D, BnaC01g39300D, BnaC03g34330D, BnaA05g35970D, BnaC08g46320D, BnaC01g31820D, BnaC08g01…
GO:0097305	response to alcohol	P	2.3e-23	2.6e-25	270	3745	0.0962224	0.0479636	BnaAnng23990D, BnaC05g17200D, BnaA09g32960D, BnaA06g27060D, BnaAnng28960D, BnaA04g25900D, BnaC05g33170D, BnaC09g34640D, BnaC05g43850D, BnaC08g10960D, BnaC06g22690D, BnaA08g08310D, BnaC08g36980D, BnaC08g38060D, BnaA06g38950D, BnaC08g28520D, BnaA05g35970D, BnaC07g16940D, BnaC08g46320D, BnaC08g48630D, BnaC08g01410D, BnaA02g35330D, BnaC01g21940D, BnaC02g42100D, BnaC06g40040D, BnaA06g37620D, BnaC02g16…
GO:0009414	response to water deprivation	P	2.9e-23	3.4e-25	185	2148	0.0659301	0.0275102	BnaC07g25010D, BnaC04g42220D, BnaC08g40190D, BnaA06g27060D, BnaC05g21480D, BnaA05g19210D, BnaA03g35670D, BnaC07g16030D, BnaA04g25900D, BnaC05g33170D, BnaA02g30130D, BnaC08g10960D, BnaA10g00280D, BnaC06g22690D, BnaA08g08310D, BnaC03g41510D, BnaA06g31640D, BnaA07g19210D, BnaC08g36980D, BnaA03g09250D, BnaC08g28520D, BnaC02g04270D, BnaC04g28220D, BnaC07g16940D, BnaC08g46320D, BnaCnng57040D, BnaC01g31…
GO:0009642	response to light intensity	P	4e-23	4.7e-25	126	1164	0.0449038	0.0149078	BnaAnng23990D, BnaA10g01680D, BnaC02g21440D, BnaC02g26030D, BnaC06g33810D, BnaA02g06890D, BnaCnng62600D, BnaC05g21480D, BnaA03g19860D, BnaA01g16730D, BnaCnng42080D, BnaC07g32600D, BnaC09g34640D, BnaAnng13800D, BnaC08g35240D, BnaC03g22460D, BnaA03g09250D, BnaA08g25940D, BnaC01g09970D, BnaA09g48570D, BnaC03g23850D, BnaC07g16940D, BnaA06g12090D, BnaA05g28580D, BnaC08g14030D, BnaA01g02980D, BnaC06g43…
GO:0010286	heat acclimation	P	5.7e-23	6.8e-25	70	394	0.0249465	0.00504611	BnaA04g00840D, BnaC07g25010D, BnaA02g06890D, BnaAnng01980D, BnaA06g18210D, BnaA08g04620D, BnaC02g07990D, BnaC09g45790D, BnaC06g30250D, BnaAnng13800D, BnaC09g01820D, BnaC03g16740D, BnaA09g30920D, BnaA06g31640D, BnaC07g06930D, BnaA03g09250D, BnaC01g13400D, BnaA10g12710D, BnaC04g04480D, BnaC06g31430D, BnaA02g04040D, BnaA10g25000D, BnaA02g06790D, BnaC04g06800D, BnaC05g42130D, BnaA03g07000D, BnaAnng08…
GO:0072330	monocarboxylic acid biosynthetic process	P	2e-22	2.4e-24	226	2949	0.0805417	0.037769	BnaAnng23990D, BnaC09g03400D, BnaA10g28450D, BnaC09g34640D, BnaCnng28450D, BnaC02g22230D, BnaC06g22690D, BnaA02g27290D, BnaC08g14190D, BnaC08g36980D, BnaA03g27250D, BnaA06g10400D, BnaC03g58590D, BnaC02g42100D, BnaC05g51350D, BnaC06g40040D, BnaC02g40040D, BnaC02g30500D, BnaA09g26390D, BnaC09g11030D, BnaA03g51030D, BnaC04g00770D, BnaA04g00600D, BnaA08g24320D, BnaA05g29310D, BnaA10g28460D, BnaC06g21…
GO:0044802	single-organism membrane organization	P	3.4e-22	4.1e-24	214	2735	0.0762651	0.0350282	BnaAnng23990D, BnaC09g03400D, BnaA10g28450D, BnaAnng22550D, BnaA04g25900D, BnaC05g43850D, BnaCnng28450D, BnaC06g22690D, BnaA02g27290D, BnaC08g36980D, BnaA03g27250D, BnaC08g28520D, BnaC03g58590D, BnaA03g27520D, BnaA09g48570D, BnaC04g45010D, BnaC02g42100D, BnaA05g28580D, BnaC02g40040D, BnaC03g03480D, BnaA06g12890D, BnaA04g21040D, BnaC07g15480D, BnaA06g14360D, BnaA01g01220D, BnaA05g35620D, BnaA05g29…
GO:0009617	response to bacterium	P	3.4e-22	4.2e-24	233	3097	0.0830364	0.0396644	BnaAnng23990D, BnaA01g12590D, BnaA02g23680D, BnaC09g03400D, BnaA10g28450D, BnaA01g28840D, BnaC09g34640D, BnaCnng28450D, BnaC02g22230D, BnaC06g22690D, BnaA08g08310D, BnaA02g27290D, BnaC08g14190D, BnaA05g25330D, BnaA03g27250D, BnaC03g02540D, BnaA06g38950D, BnaC03g58590D, BnaC02g32260D, BnaC04g45010D, BnaC08g48630D, BnaC02g42100D, BnaA01g00520D, BnaC02g40040D, BnaC03g03480D, BnaC08g01030D, BnaC02g16…
GO:0048585	negative regulation of response to stimulus	P	1.5e-21	1.9e-23	166	1893	0.0591589	0.0242444	BnaAnng23990D, BnaC02g26030D, BnaC09g03400D, BnaA08g04620D, BnaCnng64790D, BnaA10g28450D, BnaAnng11580D, BnaCnng28450D, BnaA10g00280D, BnaA02g27290D, BnaC08g36980D, BnaA03g27250D, BnaC08g28520D, BnaC03g58590D, BnaC04g28220D, BnaC04g45010D, BnaC06g23400D, BnaA07g22510D, BnaC02g42100D, BnaC04g06800D, BnaC02g40040D, BnaC03g03480D, BnaA09g20430D, BnaA04g21040D, BnaA08g16080D, BnaC07g33400D, BnaA08g24…
GO:0010310	regulation of hydrogen peroxide metabolic process	P	2.5e-20	3.2e-22	103	903	0.0367071	0.0115651	BnaAnng23990D, BnaC02g26030D, BnaC09g03400D, BnaA10g28450D, BnaCnng28450D, BnaA02g27290D, BnaA03g27250D, BnaA08g25940D, BnaC03g58590D, BnaC04g28220D, BnaC04g45010D, BnaC06g23400D, BnaA07g22510D, BnaC02g42100D, BnaC04g06800D, BnaC08g14030D, BnaC02g40040D, BnaC03g03480D, BnaAnng13920D, BnaA04g21040D, BnaC07g33400D, BnaA05g29310D, BnaA10g28460D, BnaC08g49140D, BnaC02g01170D, BnaC03g73490D, BnaC01g39…
GO:0033993	response to lipid	P	2.6e-20	3.3e-22	285	4259	0.101568	0.0545466	BnaAnng23990D, BnaC05g17200D, BnaC08g41620D, BnaA09g32960D, BnaA06g27060D, BnaA02g23680D, BnaAnng28960D, BnaA04g25900D, BnaC05g33170D, BnaC09g34640D, BnaA06g10250D, BnaC05g43850D, BnaC08g10960D, BnaC06g22690D, BnaA08g08310D, BnaC08g36980D, BnaC08g38060D, BnaA06g38950D, BnaC08g28520D, BnaA05g35970D, BnaC07g16940D, BnaC08g46320D, BnaC08g48630D, BnaC08g01410D, BnaA02g35330D, BnaC01g21940D, BnaC02g42…
GO:0009266	response to temperature stimulus	P	5.8e-20	7.4e-22	301	4617	0.10727	0.0591317	BnaA10g01680D, BnaC05g17200D, BnaA08g11570D, BnaC08g41620D, BnaA06g27060D, BnaC09g03400D, BnaA01g16730D, BnaAnng28960D, BnaA08g02130D, BnaC07g32600D, BnaA08g28380D, BnaC09g34640D, BnaA06g10250D, BnaC05g43850D, BnaC09g01820D, BnaA09g30920D, BnaC08g36980D, BnaA05g16350D, BnaC08g28520D, BnaC02g04270D, BnaC06g31430D, BnaA06g35100D, BnaC07g16940D, BnaCnng49280D, BnaA02g35330D, BnaA05g28580D, BnaC02g40…
GO:0009737	response to abscisic acid	P	7e-20	9e-22	234	3260	0.0833927	0.041752	BnaAnng23990D, BnaA06g27060D, BnaA04g25900D, BnaC05g33170D, BnaC09g34640D, BnaC05g43850D, BnaC08g10960D, BnaC06g22690D, BnaA08g08310D, BnaC08g36980D, BnaC08g38060D, BnaA06g38950D, BnaC08g28520D, BnaA05g35970D, BnaC07g16940D, BnaC08g46320D, BnaC08g48630D, BnaC08g01410D, BnaC02g42100D, BnaC06g40040D, BnaA06g37620D, BnaC02g16640D, BnaC06g43540D, BnaAnng08350D, BnaA05g10930D, BnaA09g14920D, BnaA02g09…
GO:0097306	cellular response to alcohol	P	4.6e-19	5.9e-21	148	1691	0.0527441	0.0216573	BnaAnng23990D, BnaC02g26030D, BnaC07g25010D, BnaC08g40190D, BnaC05g21480D, BnaA08g04620D, BnaA04g25900D, BnaC05g33170D, BnaC05g43850D, BnaC08g10960D, BnaC03g54940D, BnaC08g26870D, BnaA10g00280D, BnaC06g22690D, BnaA08g08310D, BnaA06g31640D, BnaA07g19210D, BnaC08g36980D, BnaA06g38950D, BnaC08g28520D, BnaC04g28220D, BnaC01g39300D, BnaC03g34330D, BnaA05g35970D, BnaC08g46320D, BnaC01g31820D, BnaC08g01…
GO:2000377	regulation of reactive oxygen species metabolic process	P	5.8e-19	7.6e-21	106	994	0.0377762	0.0127305	BnaAnng23990D, BnaC02g26030D, BnaC09g03400D, BnaA10g28450D, BnaCnng28450D, BnaA02g27290D, BnaA03g27250D, BnaA08g25940D, BnaC03g58590D, BnaC04g28220D, BnaC04g45010D, BnaC06g23400D, BnaA07g22510D, BnaC02g42100D, BnaC04g06800D, BnaC08g14030D, BnaC02g40040D, BnaC03g03480D, BnaAnng13920D, BnaC06g43540D, BnaA04g21040D, BnaC07g33400D, BnaC04g34480D, BnaA05g29310D, BnaA10g28460D, BnaC08g49140D, BnaC02g01…
GO:0006979	response to oxidative stress	P	1.9e-18	2.5e-20	189	2475	0.0673557	0.0316983	BnaA10g01680D, BnaC02g21440D, BnaA01g12590D, BnaC06g33810D, BnaC08g41620D, BnaA02g06890D, BnaC04g42220D, BnaC05g21480D, BnaA03g19860D, BnaA01g16730D, BnaCnng42080D, BnaA09g45360D, BnaC07g32600D, BnaC08g49300D, BnaA07g04890D, BnaA08g28380D, BnaC09g34640D, BnaC03g03100D, BnaAnng13800D, BnaA07g19210D, BnaC08g35240D, BnaA03g09250D, BnaC05g43010D, BnaA09g29780D, BnaC01g09970D, BnaA01g12670D, BnaA09g56…
GO:0071396	cellular response to lipid	P	2.3e-18	3.1e-20	165	2032	0.0588026	0.0260246	BnaAnng23990D, BnaC02g26030D, BnaC07g25010D, BnaC08g41620D, BnaC08g40190D, BnaC05g21480D, BnaA08g04620D, BnaC08g12000D, BnaC09g10840D, BnaA04g25900D, BnaC05g33170D, BnaA06g10250D, BnaC05g43850D, BnaC08g10960D, BnaC03g54940D, BnaC08g26870D, BnaA10g00280D, BnaC06g22690D, BnaA08g08310D, BnaA06g31640D, BnaA07g19210D, BnaC08g36980D, BnaC08g38060D, BnaC08g11750D, BnaA06g38950D, BnaC08g28520D, BnaC04g28…
GO:0009873	ethylene-activated signaling pathway	P	2.9e-18	3.9e-20	75	558	0.0267284	0.00714652	BnaAnng23990D, BnaC02g21440D, BnaC02g26030D, BnaC05g21480D, BnaA05g23050D, BnaA08g04620D, BnaC02g24170D, BnaA07g20110D, BnaC07g20040D, BnaA02g35860D, BnaA07g22640D, BnaC01g10100D, BnaA05g04380D, BnaA04g25900D, BnaA04g28860D, BnaCnng04580D, BnaC03g54940D, BnaA06g17960D, BnaC02g22230D, BnaA08g08310D, BnaA09g30920D, BnaA07g19210D, BnaC03g22460D, BnaA07g21320D, BnaA06g23810D, BnaC04g00490D, BnaC08g37…
GO:0000165	MAPK cascade	P	4.8e-18	6.5e-20	121	1272	0.0431219	0.016291	BnaAnng23990D, BnaC02g26030D, BnaC09g03400D, BnaA08g04620D, BnaA10g28450D, BnaA09g49200D, BnaC03g54940D, BnaCnng28450D, BnaC09g28710D, BnaA02g27290D, BnaC08g36980D, BnaA03g27250D, BnaA06g38950D, BnaC08g28520D, BnaC03g58590D, BnaC04g28220D, BnaC04g45010D, BnaC06g23400D, BnaA07g22510D, BnaC02g42100D, BnaC04g06800D, BnaC02g40040D, BnaC03g03480D, BnaA09g20430D, BnaA04g21040D, BnaC07g33400D, BnaA05g29…
GO:0050794	regulation of cellular process	P	1.1e-17	1.5e-19	928	19778	0.33072	0.253304	BnaC05g17200D, BnaC06g12880D, BnaA09g32960D, BnaA03g08120D, BnaA06g27060D, BnaA02g23680D, BnaC09g03400D, BnaAnng28960D, BnaA09g24500D, BnaA10g17550D, BnaA04g25900D, BnaC08g40640D, BnaA02g30130D, BnaAnng05950D, BnaC08g10960D, BnaCnng28450D, BnaA02g27290D, BnaA07g34770D, BnaA06g10400D, BnaC03g58590D, BnaA03g27520D, BnaC07g16940D, BnaC02g32260D, BnaC08g48630D, BnaCnng49280D, BnaAnng07270D, BnaA05g28…
GO:0023014	signal transduction by protein phosphorylation	P	3.6e-17	5e-19	123	1343	0.0438346	0.0172003	BnaAnng23990D, BnaC02g26030D, BnaC09g03400D, BnaA08g04620D, BnaA10g28450D, BnaA09g49200D, BnaC03g54940D, BnaCnng28450D, BnaC09g28710D, BnaA02g27290D, BnaC08g36980D, BnaA03g27250D, BnaA06g38950D, BnaC08g28520D, BnaC03g58590D, BnaC04g28220D, BnaC04g45010D, BnaC06g23400D, BnaA07g22510D, BnaC02g42100D, BnaC04g06800D, BnaC02g40040D, BnaC03g03480D, BnaA09g20430D, BnaA04g21040D, BnaC07g33400D, BnaA05g29…
GO:0009595	detection of biotic stimulus	P	5.1e-16	7.1e-18	74	604	0.0263721	0.00773566	BnaCnng24210D, BnaAnng23990D, BnaC02g26030D, BnaC09g03400D, BnaA02g31430D, BnaA07g20110D, BnaA10g28450D, BnaA08g11930D, BnaA06g10230D, BnaC08g40620D, BnaA02g27290D, BnaC08g14190D, BnaA04g05470D, BnaA06g18440D, BnaA06g27000D, BnaC03g58590D, BnaC04g28220D, BnaA02g27300D, BnaC02g32260D, BnaCnng18240D, BnaAnng28220D, BnaC02g35150D, BnaC06g23400D, BnaA07g22510D, BnaC02g42100D, BnaC04g06800D, BnaC07g29…
GO:0042742	defense response to bacterium	P	1.2e-15	1.7e-17	174	2356	0.06201	0.0301742	BnaAnng23990D, BnaA01g12590D, BnaC02g26030D, BnaC03g67380D, BnaA02g23680D, BnaC09g03400D, BnaC07g20040D, BnaA10g28450D, BnaA02g35860D, BnaC07g16030D, BnaC09g34640D, BnaC03g54940D, BnaCnng28450D, BnaC02g22230D, BnaC06g22690D, BnaA08g08310D, BnaA02g27290D, BnaC08g35240D, BnaA05g25330D, BnaA03g27250D, BnaC03g02540D, BnaA03g55320D, BnaA06g38950D, BnaA08g25940D, BnaC03g58590D, BnaC04g28220D, BnaA01g12…
GO:0035966	response to topologically incorrect protein	P	1.8e-15	2.6e-17	146	1836	0.0520314	0.0235143	BnaAnng23990D, BnaA01g12590D, BnaC02g26030D, BnaA06g27060D, BnaC08g35770D, BnaA08g04620D, BnaAnng11580D, BnaC05g43850D, BnaAnng05950D, BnaA07g19210D, BnaC03g22460D, BnaC08g36980D, BnaA03g09250D, BnaA03g27250D, BnaC07g25090D, BnaC08g28520D, BnaAnng34010D, BnaA03g27520D, BnaC04g28220D, BnaC03g34330D, BnaA01g27940D, BnaA01g12670D, BnaC02g42100D, BnaA05g28580D, BnaC04g51510D, BnaA01g02980D, BnaA09g20…
GO:1902580	single-organism cellular localization	P	6.4e-15	9.1e-17	261	4186	0.093015	0.0536117	BnaAnng23990D, BnaA06g18840D, BnaC09g03400D, BnaA10g28450D, BnaA09g45170D, BnaA01g28840D, BnaAnng22550D, BnaA04g25900D, BnaC09g34640D, BnaC05g43850D, BnaCnng28450D, BnaC06g22690D, BnaA02g27290D, BnaC08g36980D, BnaA03g27250D, BnaC08g28520D, BnaC03g58590D, BnaA03g27520D, BnaA09g48570D, BnaC02g00160D, BnaAnng21570D, BnaC02g32260D, BnaC04g45010D, BnaC02g42100D, BnaA01g00520D, BnaA05g28580D, BnaC02g40…
GO:0006605	protein targeting	P	6.4e-15	9.3e-17	259	4144	0.0923022	0.0530738	BnaAnng23990D, BnaA06g18840D, BnaC09g03400D, BnaA10g28450D, BnaA09g45170D, BnaA01g28840D, BnaAnng22550D, BnaA04g25900D, BnaC09g34640D, BnaC05g43850D, BnaCnng28450D, BnaC06g22690D, BnaA02g27290D, BnaC08g36980D, BnaA03g27250D, BnaC08g28520D, BnaC03g58590D, BnaA03g27520D, BnaA09g48570D, BnaC02g00160D, BnaAnng21570D, BnaC04g45010D, BnaC02g42100D, BnaA05g28580D, BnaC02g40040D, BnaC03g03480D, BnaA09g52…
GO:0002237	response to molecule of bacterial origin	P	4.6e-14	6.7e-16	54	378	0.0192445	0.00484119	BnaAnng23990D, BnaC02g26030D, BnaC08g13910D, BnaC03g67380D, BnaC09g03400D, BnaA02g31430D, BnaA07g20110D, BnaA10g25190D, BnaA10g28450D, BnaCnng10410D, BnaA08g11930D, BnaC03g51830D, BnaCnng28450D, BnaC03g16740D, BnaC08g14190D, BnaCnng18240D, BnaAnng28220D, BnaC06g23400D, BnaA07g22510D, BnaC03g44690D, BnaC02g40040D, BnaCnng62960D, BnaC04g55140D, BnaA04g17420D, BnaAnng29590D, BnaC07g28420D, BnaA04g27…
GO:0052542	defense response by callose deposition	P	4.9e-14	7.4e-16	54	379	0.0192445	0.004854	BnaA08g11360D, BnaC02g21440D, BnaA05g19210D, BnaA03g02020D, BnaC06g30250D, BnaCnng70590D, BnaCnng47370D, BnaC03g22460D, BnaC07g45940D, BnaC03g58590D, BnaC07g38760D, BnaC02g32260D, BnaA09g31610D, BnaA01g00520D, BnaA05g28580D, BnaA01g02730D, BnaA01g02980D, BnaA03g50900D, BnaA07g15280D, BnaA03g46490D, BnaC05g32670D, BnaA09g53510D, BnaA02g16020D, BnaA08g18370D, BnaA01g08510D, BnaC09g16820D, BnaC07g44…
GO:0006972	hyperosmotic response	P	4.9e-14	7.4e-16	116	1365	0.04134	0.0174821	BnaC07g25010D, BnaC08g41620D, BnaA06g27060D, BnaC05g21480D, BnaA05g19210D, BnaA03g35670D, BnaA04g25900D, BnaC05g33170D, BnaA10g00280D, BnaC06g22690D, BnaA08g08310D, BnaC03g41510D, BnaA06g31640D, BnaA07g19210D, BnaC08g36980D, BnaA03g09250D, BnaC08g28520D, BnaC04g28220D, BnaC07g16940D, BnaC08g46320D, BnaC01g31820D, BnaC08g01410D, BnaC04g53270D, BnaC04g51510D, BnaA06g37620D, BnaC09g07240D, BnaA02g24…
GO:0010290	chlorophyll catabolite transmembrane transporter activity	F	4.9e-14	7.5e-16	13	5	0.00463293	6.40369e-05	BnaA01g30050D, BnaA01g30060D, BnaCnng71820D, BnaC03g73620D, BnaC01g38000D, BnaC01g38010D, BnaC03g73610D, BnaA03g32690D, BnaA01g30040D, BnaA03g32640D, BnaA03g32650D, BnaC01g37970D, BnaC01g37960D
GO:0015431	glutathione S-conjugate-exporting ATPase activity	F	4.9e-14	7.5e-16	13	5	0.00463293	6.40369e-05	BnaA01g30050D, BnaA01g30060D, BnaCnng71820D, BnaC03g73620D, BnaC01g38000D, BnaC01g38010D, BnaC03g73610D, BnaA03g32690D, BnaA01g30040D, BnaA03g32640D, BnaA03g32650D, BnaC01g37970D, BnaC01g37960D
GO:0071997	glutathione S-conjugate-transporting ATPase activity	F	4.9e-14	7.5e-16	13	5	0.00463293	6.40369e-05	BnaA01g30050D, BnaA01g30060D, BnaCnng71820D, BnaC03g73620D, BnaC01g38000D, BnaC01g38010D, BnaC03g73610D, BnaA03g32690D, BnaA01g30040D, BnaA03g32640D, BnaA03g32650D, BnaC01g37970D, BnaC01g37960D
GO:0003700	transcription factor activity, sequence-specific DNA binding	F	5.2e-14	8e-16	326	5696	0.11618	0.0729508	BnaAnng23990D, BnaC05g17200D, BnaC06g12880D, BnaA03g27400D, BnaA06g27060D, BnaC09g03400D, BnaAnng28960D, BnaC07g32600D, BnaC05g40340D, BnaA04g25900D, BnaC05g33170D, BnaCnng04580D, BnaC03g50150D, BnaAnng05950D, BnaC08g10960D, BnaA08g25980D, BnaA08g08310D, BnaA06g35100D, BnaC07g16940D, BnaC08g48630D, BnaCnng49280D, BnaA10g12460D, BnaAnng07270D, BnaC01g21940D, BnaA01g11880D, BnaA05g28580D, BnaC06g40…
GO:0001071	nucleic acid binding transcription factor activity	F	6.9e-14	1.1e-15	326	5709	0.11618	0.0731173	BnaAnng23990D, BnaC05g17200D, BnaC06g12880D, BnaA03g27400D, BnaA06g27060D, BnaC09g03400D, BnaAnng28960D, BnaC07g32600D, BnaC05g40340D, BnaA04g25900D, BnaC05g33170D, BnaCnng04580D, BnaC03g50150D, BnaAnng05950D, BnaC08g10960D, BnaA08g25980D, BnaA08g08310D, BnaA06g35100D, BnaC07g16940D, BnaC08g48630D, BnaCnng49280D, BnaA10g12460D, BnaAnng07270D, BnaC01g21940D, BnaA01g11880D, BnaA05g28580D, BnaC06g40…
GO:0042542	response to hydrogen peroxide	P	7.8e-14	1.2e-15	82	797	0.0292231	0.0102075	BnaA10g01680D, BnaC06g33810D, BnaA02g06890D, BnaA03g19860D, BnaA01g16730D, BnaCnng42080D, BnaC07g32600D, BnaA03g28480D, BnaA08g28380D, BnaAnng13800D, BnaA10g18890D, BnaC08g35240D, BnaA09g55990D, BnaC08g41760D, BnaA10g12710D, BnaC01g09970D, BnaA09g56330D, BnaC03g23850D, BnaA10g25000D, BnaA10g01350D, BnaC08g46320D, BnaA06g18100D, BnaA06g12090D, BnaC08g01410D, BnaA04g26930D, BnaC05g42130D, BnaC06g43…
GO:0071369	cellular response to ethylene stimulus	P	7.9e-14	1.2e-15	76	703	0.0270848	0.00900359	BnaAnng23990D, BnaC02g21440D, BnaC02g26030D, BnaC05g21480D, BnaA05g23050D, BnaA08g04620D, BnaC02g24170D, BnaA07g20110D, BnaC07g20040D, BnaA02g35860D, BnaA07g22640D, BnaC01g10100D, BnaA05g04380D, BnaA04g25900D, BnaA04g28860D, BnaCnng04580D, BnaC03g54940D, BnaA06g17960D, BnaC02g22230D, BnaA08g08310D, BnaA09g30920D, BnaA07g19210D, BnaC03g22460D, BnaA07g21320D, BnaA06g23810D, BnaC04g00490D, BnaC08g37…
GO:0034605	cellular response to heat	P	1.9e-13	3.1e-15	24	65	0.0085531	0.00083248	BnaC03g21360D, BnaC05g17200D, BnaA09g39860D, BnaC02g01720D, BnaA05g12160D, BnaC04g14500D, BnaA06g30120D, BnaAnng01980D, BnaAnng28960D, BnaA04g22040D, BnaC06g38250D, BnaC04g06800D, BnaA03g13820D, BnaCnng75020D, BnaCnng66020D, BnaC03g16740D, BnaA04g17420D, BnaC07g26590D, BnaA03g17820D, BnaA02g01140D, BnaC06g00880D, BnaC04g41050D, BnaA10g27820D, BnaC02g04270D
GO:0050789	regulation of biological process	P	2.5e-13	4e-15	994	22267	0.354241	0.285182	BnaC05g17200D, BnaC08g41620D, BnaC06g12880D, BnaA09g32960D, BnaA03g08120D, BnaA06g27060D, BnaA02g23680D, BnaC09g03400D, BnaAnng28960D, BnaA09g24500D, BnaA10g17550D, BnaA04g25900D, BnaC08g40640D, BnaA02g30130D, BnaAnng05950D, BnaC08g10960D, BnaCnng28450D, BnaA02g27290D, BnaA07g34770D, BnaC03g60450D, BnaA06g10400D, BnaC03g58590D, BnaA03g27520D, BnaC07g16940D, BnaC02g32260D, BnaC08g48630D, BnaCnng49…
GO:0009409	response to cold	P	3.7e-13	5.8e-15	201	3073	0.0716322	0.0393571	BnaC05g17200D, BnaA08g11570D, BnaA06g27060D, BnaC09g03400D, BnaAnng28960D, BnaA08g02130D, BnaA08g28380D, BnaC09g34640D, BnaA06g10250D, BnaC05g43850D, BnaC08g36980D, BnaA05g16350D, BnaC08g28520D, BnaC02g04270D, BnaA06g35100D, BnaC07g16940D, BnaCnng49280D, BnaA02g35330D, BnaA05g28580D, BnaC02g40040D, BnaC09g07240D, BnaC02g30500D, BnaA10g07630D, BnaC06g43540D, BnaAnng08350D, BnaA02g12810D, BnaA09g39…
GO:0065007	biological regulation	P	4.1e-13	6.6e-15	1107	25289	0.394512	0.323886	BnaA03g57660D, BnaC05g17200D, BnaC08g41620D, BnaC06g12880D, BnaA09g32960D, BnaA03g08120D, BnaA06g27060D, BnaA02g23680D, BnaC09g03400D, BnaAnng28960D, BnaA09g24500D, BnaA10g17550D, BnaA04g25900D, BnaC08g40640D, BnaA02g30130D, BnaAnng05950D, BnaC08g10960D, BnaCnng28450D, BnaA02g27290D, BnaA07g34770D, BnaC03g60450D, BnaA06g10400D, BnaC03g58590D, BnaA03g27520D, BnaC07g16940D, BnaC02g32260D, BnaC08g46…
GO:0010035	response to inorganic substance	P	6.1e-13	1e-14	384	7140	0.13685	0.0914447	BnaA10g01680D, BnaC08g41620D, BnaC04g42220D, BnaA06g27060D, BnaCnng28600D, BnaA03g19860D, BnaA01g16730D, BnaC07g32600D, BnaC03g23130D, BnaC03g31360D, BnaA01g28840D, BnaC03g55460D, BnaA04g25900D, BnaC05g33170D, BnaA08g28380D, BnaA02g30130D, BnaCnng04580D, BnaC08g10960D, BnaC06g22690D, BnaA08g08310D, BnaC04g46100D, BnaC08g36980D, BnaA02g14850D, BnaA10g07970D, BnaC08g28520D, BnaC02g04270D, BnaA03g27…
GO:0051606	detection of stimulus	P	1.1e-12	1.8e-14	84	874	0.0299359	0.0111936	BnaCnng24210D, BnaAnng23990D, BnaC02g26030D, BnaC08g41620D, BnaC09g03400D, BnaA04g05850D, BnaA04g05430D, BnaA02g31430D, BnaA07g20110D, BnaA10g28450D, BnaC03g23130D, BnaA08g11930D, BnaA04g02760D, BnaA06g10230D, BnaC08g40620D, BnaA02g27290D, BnaC08g14190D, BnaA04g05470D, BnaA06g18440D, BnaA06g27000D, BnaC03g58590D, BnaC04g28220D, BnaA02g27300D, BnaC02g32260D, BnaCnng18240D, BnaAnng28220D, BnaC02g35…
GO:0070370	cellular heat acclimation	P	1.3e-12	2.2e-14	15	16	0.00534569	0.000204918	BnaC03g21360D, BnaC02g01720D, BnaA05g12160D, BnaC04g14500D, BnaA06g30120D, BnaAnng01980D, BnaA04g22040D, BnaC04g06800D, BnaA03g13820D, BnaCnng66020D, BnaC03g16740D, BnaA04g17420D, BnaC07g26590D, BnaA03g17820D, BnaC04g41050D
GO:0000160	phosphorelay signal transduction system	P	1.3e-12	2.2e-14	75	731	0.0267284	0.00936219	BnaAnng23990D, BnaC02g21440D, BnaC02g26030D, BnaC05g21480D, BnaA05g23050D, BnaA08g04620D, BnaC02g24170D, BnaA07g20110D, BnaC07g20040D, BnaA02g35860D, BnaA07g22640D, BnaC01g10100D, BnaA05g04380D, BnaA04g25900D, BnaA04g28860D, BnaCnng04580D, BnaC03g54940D, BnaA06g17960D, BnaC02g22230D, BnaA08g08310D, BnaA09g30920D, BnaA07g19210D, BnaC03g22460D, BnaA07g21320D, BnaA06g23810D, BnaC04g00490D, BnaC08g37…
GO:0071702	organic substance transport	P	1.8e-12	3e-14	423	8112	0.150748	0.103893	BnaA06g18840D, BnaC09g03400D, BnaA04g25900D, BnaC09g34640D, BnaA02g30130D, BnaC05g43850D, BnaCnng28450D, BnaA02g27290D, BnaC03g58590D, BnaA03g27520D, BnaC02g00160D, BnaA04g29630D, BnaA01g01730D, BnaC04g45010D, BnaA09g51590D, BnaC02g42100D, BnaA05g28580D, BnaC02g40040D, BnaC03g03480D, BnaC08g40880D, BnaC06g21740D, BnaC03g35120D, BnaA06g14360D, BnaCnng05320D, BnaA05g29310D, BnaC03g18020D, BnaC08g39…
GO:1901617	organic hydroxy compound biosynthetic process	P	2.4e-12	4e-14	178	2664	0.0634355	0.0341189	BnaAnng23990D, BnaC02g26030D, BnaCnng62600D, BnaC09g03400D, BnaA08g11380D, BnaA10g28450D, BnaC09g42490D, BnaC09g10840D, BnaC02g21400D, BnaC09g34640D, BnaCnng28450D, BnaA02g27290D, BnaC08g14190D, BnaC08g35240D, BnaC08g36980D, BnaA03g27250D, BnaA08g25940D, BnaC03g58590D, BnaC04g28220D, BnaC06g23400D, BnaA07g22510D, BnaC02g42100D, BnaC04g06800D, BnaA06g26720D, BnaC08g14030D, BnaC02g40040D, BnaC07g40…
GO:0006886	intracellular protein transport	P	7.6e-12	1.3e-13	270	4676	0.0962224	0.0598873	BnaAnng23990D, BnaA06g18840D, BnaC09g03400D, BnaA10g28450D, BnaA09g45170D, BnaA01g28840D, BnaAnng22550D, BnaA04g25900D, BnaC09g34640D, BnaC05g43850D, BnaCnng28450D, BnaC06g22690D, BnaA02g27290D, BnaC08g36980D, BnaA03g27250D, BnaC08g28520D, BnaC03g58590D, BnaA03g27520D, BnaA09g48570D, BnaC02g00160D, BnaAnng21570D, BnaC04g45010D, BnaC02g42100D, BnaA05g28580D, BnaC02g40040D, BnaC03g03480D, BnaA09g52…
GO:0016762	xyloglucan:xyloglucosyl transferase activity	F	1.7e-11	2.9e-13	23	75	0.00819672	0.000960553	BnaA01g06740D, BnaCnng62600D, BnaA03g50060D, BnaCnng13310D, BnaC01g17710D, BnaC07g42520D, BnaA03g38180D, BnaC01g25620D, BnaA02g35330D, BnaA01g15000D, BnaA02g35320D, BnaCnng38050D, BnaA10g11500D, BnaA06g07180D, BnaC02g11500D, BnaCnng35910D, BnaA02g35250D, BnaAnng19040D, BnaC08g39360D, BnaAnng23050D, BnaC02g11480D, BnaC09g32750D, BnaC03g67970D
GO:0009644	response to high light intensity	P	3.1e-11	5.2e-13	85	953	0.0302922	0.0122054	BnaA10g01680D, BnaC02g21440D, BnaC06g33810D, BnaA02g06890D, BnaC05g21480D, BnaA03g19860D, BnaA01g16730D, BnaCnng42080D, BnaC07g32600D, BnaC08g40850D, BnaC09g34640D, BnaAnng13800D, BnaA10g18890D, BnaC08g35240D, BnaC07g06930D, BnaA09g55990D, BnaC08g41760D, BnaA10g12710D, BnaC01g09970D, BnaC03g23850D, BnaA10g25000D, BnaA05g20490D, BnaC07g16940D, BnaA10g01350D, BnaA06g18100D, BnaA06g12090D, BnaA04g26…
GO:0043900	regulation of multi-organism process	P	5.7e-11	9.8e-13	76	811	0.0270848	0.0103868	BnaCnng24210D, BnaAnng23990D, BnaC02g26030D, BnaC03g67380D, BnaC09g03400D, BnaA02g31430D, BnaA07g20110D, BnaA10g28450D, BnaA08g11930D, BnaA06g10230D, BnaC08g40620D, BnaA02g27290D, BnaA04g05470D, BnaA06g18440D, BnaA06g27000D, BnaC03g58590D, BnaC04g28220D, BnaA02g27300D, BnaCnng18240D, BnaAnng28220D, BnaC02g35150D, BnaC06g23400D, BnaA07g22510D, BnaC02g42100D, BnaC04g06800D, BnaC07g29940D, BnaC02g40…
GO:0034613	cellular protein localization	P	1.2e-10	2e-12	270	4803	0.0962224	0.0615138	BnaAnng23990D, BnaA06g18840D, BnaC09g03400D, BnaA10g28450D, BnaA09g45170D, BnaA01g28840D, BnaAnng22550D, BnaA04g25900D, BnaC09g34640D, BnaC05g43850D, BnaCnng28450D, BnaC06g22690D, BnaA02g27290D, BnaC08g36980D, BnaA03g27250D, BnaC08g28520D, BnaC03g58590D, BnaA03g27520D, BnaA09g48570D, BnaC02g00160D, BnaAnng21570D, BnaC04g45010D, BnaC02g42100D, BnaA05g28580D, BnaC02g40040D, BnaC03g03480D, BnaA09g52…
GO:0048519	negative regulation of biological process	P	2e-10	3.5e-12	310	5740	0.110478	0.0735143	BnaC08g25470D, BnaAnng23990D, BnaA09g32960D, BnaA03g08120D, BnaA02g23680D, BnaC09g03400D, BnaA09g24500D, BnaCnng64790D, BnaA10g28450D, BnaC03g33170D, BnaC03g10310D, BnaA04g25900D, BnaC05g33170D, BnaA04g26230D, BnaCnng04580D, BnaC08g10960D, BnaCnng28450D, BnaC06g22690D, BnaA02g27290D, BnaC08g36980D, BnaA03g27250D, BnaC06g13250D, BnaC08g28520D, BnaC02g04270D, BnaC03g58590D, BnaA03g27520D, BnaA09g48…
GO:0015031	protein transport	P	3.2e-10	5.6e-12	282	5124	0.100499	0.065625	BnaAnng23990D, BnaA06g18840D, BnaC09g03400D, BnaA10g28450D, BnaA09g45170D, BnaA01g28840D, BnaAnng22550D, BnaA04g25900D, BnaC09g34640D, BnaC05g43850D, BnaCnng28450D, BnaC06g22690D, BnaA02g27290D, BnaC08g36980D, BnaA03g27250D, BnaC08g28520D, BnaC03g58590D, BnaA03g27520D, BnaA09g48570D, BnaC02g00160D, BnaAnng21570D, BnaC04g45010D, BnaC02g42100D, BnaA05g28580D, BnaC02g40040D, BnaC03g03480D, BnaA09g52…
GO:0044765	single-organism transport	P	4e-10	7.2e-12	616	13190	0.21953	0.168929	BnaC03g00090D, BnaA06g18840D, BnaC08g41620D, BnaC09g03400D, BnaA04g17140D, BnaA04g25900D, BnaC09g34640D, BnaA02g30130D, BnaCnng04580D, BnaC05g43850D, BnaCnng28450D, BnaC09g28710D, BnaA02g27290D, BnaC04g46100D, BnaC03g58590D, BnaA03g27520D, BnaC02g00160D, BnaA04g29630D, BnaC02g32260D, BnaA01g01730D, BnaC04g45010D, BnaA09g51590D, BnaC06g06610D, BnaC02g42100D, BnaA05g28580D, BnaC02g40040D, BnaC03g03…
GO:0045184	establishment of protein localization	P	4.5e-10	8e-12	282	5142	0.100499	0.0658555	BnaAnng23990D, BnaA06g18840D, BnaC09g03400D, BnaA10g28450D, BnaA09g45170D, BnaA01g28840D, BnaAnng22550D, BnaA04g25900D, BnaC09g34640D, BnaC05g43850D, BnaCnng28450D, BnaC06g22690D, BnaA02g27290D, BnaC08g36980D, BnaA03g27250D, BnaC08g28520D, BnaC03g58590D, BnaA03g27520D, BnaA09g48570D, BnaC02g00160D, BnaAnng21570D, BnaC04g45010D, BnaC02g42100D, BnaA05g28580D, BnaC02g40040D, BnaC03g03480D, BnaA09g52…
GO:0000302	response to reactive oxygen species	P	5.2e-10	9.3e-12	111	1495	0.0395581	0.019147	BnaA10g01680D, BnaC02g21440D, BnaC06g33810D, BnaC08g41620D, BnaA02g06890D, BnaA03g19860D, BnaA01g16730D, BnaCnng42080D, BnaC07g32600D, BnaA08g28380D, BnaAnng13800D, BnaA07g19210D, BnaC08g35240D, BnaC01g09970D, BnaA09g56330D, BnaC03g23850D, BnaA06g35100D, BnaC08g46320D, BnaA06g12090D, BnaC08g01410D, BnaA02g04480D, BnaC04g51510D, BnaC06g43540D, BnaCnng68550D, BnaA09g40360D, BnaA09g53510D, BnaCnng63…
GO:0052545	callose localization	P	6.7e-10	1.2e-11	56	527	0.0199572	0.00674949	BnaA08g11360D, BnaC02g21440D, BnaA05g19210D, BnaA03g02020D, BnaC06g30250D, BnaCnng70590D, BnaCnng47370D, BnaC03g22460D, BnaC07g45940D, BnaC03g58590D, BnaC07g38760D, BnaC02g32260D, BnaA09g31610D, BnaA01g00520D, BnaA05g28580D, BnaA01g02730D, BnaA01g02980D, BnaA03g50900D, BnaA07g15280D, BnaC03g35120D, BnaA03g29890D, BnaA03g46490D, BnaC05g32670D, BnaA09g53510D, BnaA02g16020D, BnaA08g18370D, BnaA01g08…
GO:0009694	jasmonic acid metabolic process	P	1.2e-09	2.3e-11	70	767	0.0249465	0.00982326	BnaAnng23990D, BnaAnng01940D, BnaC02g21440D, BnaC02g26030D, BnaA04g00840D, BnaCnng51910D, BnaC05g21480D, BnaA06g18210D, BnaA05g19210D, BnaA07g20110D, BnaA03g11970D, BnaC05g21910D, BnaC07g42240D, BnaC09g34640D, BnaC09g37560D, BnaA10g00280D, BnaC06g22690D, BnaA08g31640D, BnaA03g09250D, BnaA09g27230D, BnaC03g26850D, BnaC04g04480D, BnaA02g06790D, BnaC02g42100D, BnaC08g36840D, BnaC08g07690D, BnaCnng22…
GO:1902578	single-organism localization	P	1.3e-09	2.4e-11	617	13312	0.219886	0.170492	BnaC03g00090D, BnaA06g18840D, BnaC08g41620D, BnaC09g03400D, BnaA04g17140D, BnaA04g25900D, BnaC09g34640D, BnaA02g30130D, BnaCnng04580D, BnaC05g43850D, BnaCnng28450D, BnaC09g28710D, BnaA02g27290D, BnaC04g46100D, BnaC03g58590D, BnaA03g27520D, BnaC02g00160D, BnaA04g29630D, BnaC02g32260D, BnaA01g01730D, BnaC04g45010D, BnaA09g51590D, BnaC06g06610D, BnaC02g42100D, BnaA01g00520D, BnaA05g28580D, BnaC02g40…
GO:0070727	cellular macromolecule localization	P	1.3e-09	2.4e-11	272	4971	0.0969351	0.0636655	BnaAnng23990D, BnaA06g18840D, BnaC09g03400D, BnaA10g28450D, BnaA09g45170D, BnaA01g28840D, BnaAnng22550D, BnaA04g25900D, BnaC09g34640D, BnaC05g43850D, BnaCnng28450D, BnaC06g22690D, BnaA02g27290D, BnaC08g36980D, BnaA03g27250D, BnaC08g28520D, BnaC03g58590D, BnaA03g27520D, BnaA09g48570D, BnaC02g00160D, BnaAnng21570D, BnaC02g32260D, BnaC04g45010D, BnaC02g42100D, BnaA01g00520D, BnaA05g28580D, BnaC02g40…
GO:0009646	response to absence of light	P	1.4e-09	2.7e-11	26	128	0.00926586	0.00163934	BnaAnng23990D, BnaA08g11360D, BnaC02g26030D, BnaC04g34480D, BnaA05g35690D, BnaC07g44740D, BnaA04g22680D, BnaA07g20110D, BnaA09g35410D, BnaA08g11930D, BnaC09g37560D, BnaC03g77080D, BnaC03g22460D, BnaA09g48570D, BnaA10g15190D, BnaA05g28580D, BnaA01g02980D, BnaC08g42830D, BnaA03g50900D, BnaA03g00170D, BnaC06g43540D, BnaC08g26770D, BnaCnng06580D, BnaC08g26910D, BnaC04g56750D, BnaA07g25810D
GO:0033037	polysaccharide localization	P	1.8e-09	3.5e-11	56	543	0.0199572	0.00695441	BnaA08g11360D, BnaC02g21440D, BnaA05g19210D, BnaA03g02020D, BnaC06g30250D, BnaCnng70590D, BnaCnng47370D, BnaC03g22460D, BnaC07g45940D, BnaC03g58590D, BnaC07g38760D, BnaC02g32260D, BnaA09g31610D, BnaA01g00520D, BnaA05g28580D, BnaA01g02730D, BnaA01g02980D, BnaA03g50900D, BnaA07g15280D, BnaC03g35120D, BnaA03g29890D, BnaA03g46490D, BnaC05g32670D, BnaA09g53510D, BnaA02g16020D, BnaA08g18370D, BnaA01g08…
GO:0080142	regulation of salicylic acid biosynthetic process	P	2.4e-09	4.5e-11	9	4	0.00320741	5.12295e-05	BnaA09g04040D, BnaC06g34630D, BnaC09g03400D, BnaAnng28220D, BnaA02g31430D, BnaC06g23400D, BnaA07g22510D, BnaC02g40040D, BnaC07g28420D
GO:0080086	stamen filament development	P	2.8e-09	5.4e-11	12	16	0.00427655	0.000204918	BnaC02g21440D, BnaA06g31880D, BnaC08g37760D, BnaC01g36030D, BnaC03g39170D, BnaA09g02150D, BnaC08g39360D, BnaA03g33930D, BnaA02g16020D, BnaA01g28670D, BnaC09g01550D, BnaC07g24710D
GO:0009733	response to auxin	P	2.9e-09	5.4e-11	141	2145	0.0502495	0.0274718	BnaA03g57660D, BnaC07g25010D, BnaCnng62600D, BnaC05g21480D, BnaC02g44790D, BnaC02g21400D, BnaC07g16030D, BnaA04g25900D, BnaC05g33170D, BnaA04g26230D, BnaA08g14810D, BnaC06g22690D, BnaA06g31640D, BnaA07g19210D, BnaC08g35240D, BnaC08g36980D, BnaA02g35250D, BnaA01g16310D, BnaC08g28520D, BnaC04g28220D, BnaA06g35100D, BnaC08g48630D, BnaA02g35330D, BnaC04g53270D, BnaC04g51510D, BnaC02g16640D, BnaC06g43…
GO:0009695	jasmonic acid biosynthetic process	P	2.9e-09	5.6e-11	61	632	0.0217391	0.00809426	BnaAnng23990D, BnaAnng01940D, BnaC02g21440D, BnaC02g26030D, BnaA04g00840D, BnaCnng51910D, BnaC05g21480D, BnaA06g18210D, BnaA05g19210D, BnaA07g20110D, BnaA03g11970D, BnaC05g21910D, BnaC09g34640D, BnaC09g37560D, BnaA10g00280D, BnaC06g22690D, BnaA03g09250D, BnaA09g27230D, BnaC03g26850D, BnaC04g04480D, BnaA02g06790D, BnaC02g42100D, BnaC08g36840D, BnaC08g07690D, BnaCnng22600D, BnaC09g35160D, BnaC08g48…
GO:0036293	response to decreased oxygen levels	P	3e-09	5.9e-11	50	457	0.017819	0.00585297	BnaC03g28310D, BnaC09g03400D, BnaA04g05430D, BnaA02g31430D, BnaA03g23810D, BnaAnng05950D, BnaC06g24380D, BnaC02g43600D, BnaA06g23810D, BnaA06g18440D, BnaC09g47250D, BnaA07g33580D, BnaA06g27000D, BnaCnng58920D, BnaA01g19990D, BnaAnng28220D, BnaC06g23400D, BnaA07g22510D, BnaA01g00520D, BnaC03g49410D, BnaAnng33930D, BnaC07g29940D, BnaA06g22900D, BnaC02g40040D, BnaAnng13920D, BnaA02g34440D, BnaC07g28…
GO:0070482	response to oxygen levels	P	3.5e-09	6.7e-11	50	459	0.017819	0.00587859	BnaC03g28310D, BnaC09g03400D, BnaA04g05430D, BnaA02g31430D, BnaA03g23810D, BnaAnng05950D, BnaC06g24380D, BnaC02g43600D, BnaA06g23810D, BnaA06g18440D, BnaC09g47250D, BnaA07g33580D, BnaA06g27000D, BnaCnng58920D, BnaA01g19990D, BnaAnng28220D, BnaC06g23400D, BnaA07g22510D, BnaA01g00520D, BnaC03g49410D, BnaAnng33930D, BnaC07g29940D, BnaA06g22900D, BnaC02g40040D, BnaAnng13920D, BnaA02g34440D, BnaC07g28…
GO:0042743	hydrogen peroxide metabolic process	P	5.1e-09	9.9e-11	117	1679	0.0416964	0.0215036	BnaAnng23990D, BnaC02g26030D, BnaC09g03400D, BnaA10g28450D, BnaCnng28450D, BnaA02g27290D, BnaA05g25330D, BnaA03g27250D, BnaA08g25940D, BnaC03g58590D, BnaC04g28220D, BnaC04g45010D, BnaC06g23400D, BnaA07g22510D, BnaC02g42100D, BnaC04g06800D, BnaC08g14030D, BnaC02g40040D, BnaC03g03480D, BnaAnng13920D, BnaA08g17210D, BnaA04g09740D, BnaA04g21040D, BnaA08g16080D, BnaC07g33400D, BnaA05g29310D, BnaA10g28…
GO:0072593	reactive oxygen species metabolic process	P	5.2e-09	1e-10	127	1880	0.0452602	0.0240779	BnaAnng23990D, BnaC02g26030D, BnaC09g03400D, BnaA10g28450D, BnaCnng28450D, BnaA02g27290D, BnaA05g25330D, BnaA03g27250D, BnaA08g25940D, BnaC03g58590D, BnaC04g28220D, BnaA06g35100D, BnaC04g45010D, BnaC06g23400D, BnaA07g22510D, BnaC02g42100D, BnaC04g06800D, BnaC08g14030D, BnaC02g40040D, BnaC03g03480D, BnaAnng13920D, BnaA08g17210D, BnaA04g09740D, BnaC06g43540D, BnaA04g21040D, BnaA08g16080D, BnaC07g33…
GO:0006810	transport	P	6.2e-09	1.2e-10	665	14665	0.236992	0.18782	BnaA03g29930D, BnaC03g00090D, BnaA06g18840D, BnaC08g41620D, BnaC09g03400D, BnaA04g17140D, BnaA04g25900D, BnaC09g34640D, BnaC08g39420D, BnaA02g30130D, BnaCnng04580D, BnaC05g43850D, BnaCnng28450D, BnaC09g28710D, BnaA02g27290D, BnaC04g46100D, BnaC03g58590D, BnaA03g27520D, BnaC02g00160D, BnaA04g29630D, BnaC02g32260D, BnaA01g01730D, BnaC04g45010D, BnaA09g51590D, BnaC06g06610D, BnaC02g42100D, BnaA05g28…
GO:0006970	response to osmotic stress	P	8.7e-09	1.7e-10	246	4479	0.0876693	0.0573642	BnaA06g18840D, BnaC08g41620D, BnaC04g42220D, BnaA06g27060D, BnaC09g22150D, BnaA08g02130D, BnaA04g25900D, BnaC05g33170D, BnaA08g28380D, BnaC09g34640D, BnaC05g43850D, BnaC02g22230D, BnaC06g22690D, BnaA08g08310D, BnaA02g27290D, BnaC08g36980D, BnaC08g28520D, BnaC02g04270D, BnaC03g58590D, BnaA06g35100D, BnaC07g16940D, BnaC08g46320D, BnaC08g48630D, BnaC06g38790D, BnaC08g01410D, BnaC08g14600D, BnaC06g40…
GO:0043531	ADP binding	F	8.8e-09	1.8e-10	48	442	0.0171062	0.00566086	BnaC09g18900D, BnaC02g47400D, BnaCnng11210D, BnaC07g35930D, BnaA05g24990D, BnaA09g07720D, BnaC07g35950D, BnaA06g28070D, BnaA03g56180D, BnaA02g24500D, BnaC09g12630D, BnaC08g40550D, BnaCnng77370D, BnaC02g16530D, BnaC02g08030D, BnaA08g09220D, BnaA07g34770D, BnaC02g08020D, BnaA03g45000D, BnaC09g23580D, BnaC01g24780D, BnaC06g39660D, BnaC09g50760D, BnaAnng27760D, BnaA09g18030D, BnaA03g29580D, BnaA01g03…
GO:1901615	organic hydroxy compound metabolic process	P	1.7e-08	3.5e-10	202	3525	0.0719886	0.045146	BnaAnng23990D, BnaC07g50260D, BnaC09g03400D, BnaC09g22150D, BnaA10g28450D, BnaC09g42490D, BnaC02g21400D, BnaC09g34640D, BnaCnng28450D, BnaA02g27290D, BnaC08g14190D, BnaC08g36980D, BnaA03g27250D, BnaA02g14850D, BnaC03g58590D, BnaCnng57040D, BnaC02g42100D, BnaA06g26720D, BnaC02g40040D, BnaC02g14450D, BnaC09g29540D, BnaC01g18900D, BnaA03g58750D, BnaA08g24320D, BnaA05g29310D, BnaA10g28460D, BnaC06g21…
GO:0016053	organic acid biosynthetic process	P	2.3e-08	4.7e-10	264	4944	0.0940841	0.0633197	BnaAnng23990D, BnaC08g41620D, BnaA03g27400D, BnaC09g03400D, BnaA10g28450D, BnaC09g34640D, BnaA06g10250D, BnaCnng28450D, BnaC02g22230D, BnaC06g22690D, BnaA02g27290D, BnaC08g14190D, BnaC08g36980D, BnaC08g38060D, BnaA03g27250D, BnaA06g10400D, BnaC03g58590D, BnaC02g42100D, BnaC05g51350D, BnaC06g40040D, BnaC02g40040D, BnaC02g30500D, BnaA09g26390D, BnaC04g26330D, BnaC09g11030D, BnaA09g18990D, BnaA03g51…
GO:0046394	carboxylic acid biosynthetic process	P	2.3e-08	4.7e-10	264	4944	0.0940841	0.0633197	BnaAnng23990D, BnaC08g41620D, BnaA03g27400D, BnaC09g03400D, BnaA10g28450D, BnaC09g34640D, BnaA06g10250D, BnaCnng28450D, BnaC02g22230D, BnaC06g22690D, BnaA02g27290D, BnaC08g14190D, BnaC08g36980D, BnaC08g38060D, BnaA03g27250D, BnaA06g10400D, BnaC03g58590D, BnaC02g42100D, BnaC05g51350D, BnaC06g40040D, BnaC02g40040D, BnaC02g30500D, BnaA09g26390D, BnaC04g26330D, BnaC09g11030D, BnaA09g18990D, BnaA03g51…
GO:0051234	establishment of localization	P	4e-08	8.2e-10	669	14939	0.238418	0.191329	BnaA03g29930D, BnaC03g00090D, BnaA06g18840D, BnaC08g41620D, BnaC09g03400D, BnaA04g17140D, BnaA04g25900D, BnaC09g34640D, BnaC08g39420D, BnaA02g30130D, BnaCnng04580D, BnaC05g43850D, BnaCnng28450D, BnaC09g28710D, BnaA02g27290D, BnaC04g46100D, BnaC03g58590D, BnaA03g27520D, BnaC02g00160D, BnaA04g29630D, BnaC02g32260D, BnaA01g01730D, BnaC04g45010D, BnaA09g51590D, BnaC06g06610D, BnaC02g42100D, BnaA05g28…
GO:0008104	protein localization	P	5e-08	1e-09	282	5406	0.100499	0.0692367	BnaAnng23990D, BnaA06g18840D, BnaC09g03400D, BnaA10g28450D, BnaA09g45170D, BnaA01g28840D, BnaAnng22550D, BnaA04g25900D, BnaC09g34640D, BnaC05g43850D, BnaCnng28450D, BnaC06g22690D, BnaA02g27290D, BnaC08g36980D, BnaA03g27250D, BnaC08g28520D, BnaC03g58590D, BnaA03g27520D, BnaA09g48570D, BnaC02g00160D, BnaAnng21570D, BnaC04g45010D, BnaC02g42100D, BnaA05g28580D, BnaC02g40040D, BnaC03g03480D, BnaA09g52…
GO:0006468	protein phosphorylation	P	6.5e-08	1.3e-09	284	5469	0.101212	0.0700435	BnaAnng23990D, BnaA01g12590D, BnaC09g03400D, BnaC08g38820D, BnaA10g28450D, BnaA03g09820D, BnaA04g26230D, BnaC05g43850D, BnaA09g49200D, BnaCnng28450D, BnaC09g28710D, BnaC02g22230D, BnaA02g27290D, BnaC04g46100D, BnaC08g36980D, BnaA03g27250D, BnaA06g38950D, BnaC08g28520D, BnaC03g58590D, BnaC09g50140D, BnaC02g32260D, BnaC04g45010D, BnaC08g48860D, BnaC06g38790D, BnaC02g42100D, BnaA01g15980D, BnaC03g18…
GO:0009314	response to radiation	P	6.8e-08	1.4e-09	285	5495	0.101568	0.0703765	BnaC08g25470D, BnaAnng23990D, BnaA10g01680D, BnaA03g08120D, BnaA03g19860D, BnaA01g16730D, BnaA08g09860D, BnaC07g32600D, BnaC03g23130D, BnaC03g10310D, BnaA08g28380D, BnaC09g34640D, BnaC08g40640D, BnaA04g26230D, BnaA02g30130D, BnaA06g10250D, BnaCnng04580D, BnaAnng05950D, BnaC06g13250D, BnaA09g48570D, BnaA09g56330D, BnaC03g23850D, BnaA06g35100D, BnaC07g16940D, BnaCnng57040D, BnaA05g28580D, BnaC02g30…
GO:0009416	response to light stimulus	P	9.9e-08	2.1e-09	273	5237	0.0972915	0.0670722	BnaC08g25470D, BnaAnng23990D, BnaA10g01680D, BnaA03g19860D, BnaA01g16730D, BnaC07g32600D, BnaC03g23130D, BnaA08g28380D, BnaC09g34640D, BnaC08g40640D, BnaA04g26230D, BnaA02g30130D, BnaA06g10250D, BnaCnng04580D, BnaAnng05950D, BnaA09g48570D, BnaA09g56330D, BnaC03g23850D, BnaA06g35100D, BnaC07g16940D, BnaCnng57040D, BnaA05g28580D, BnaC02g30500D, BnaC07g13550D, BnaC06g43540D, BnaAnng08350D, BnaA02g12…
GO:0009651	response to salt stress	P	1.2e-07	2.6e-09	230	4256	0.0819672	0.0545082	BnaA06g18840D, BnaC08g41620D, BnaA06g27060D, BnaC09g22150D, BnaA08g02130D, BnaA04g25900D, BnaC05g33170D, BnaA08g28380D, BnaC09g34640D, BnaC05g43850D, BnaC02g22230D, BnaC06g22690D, BnaA08g08310D, BnaA02g27290D, BnaC08g36980D, BnaC08g28520D, BnaC03g58590D, BnaA06g35100D, BnaC07g16940D, BnaC08g46320D, BnaC08g48630D, BnaC06g38790D, BnaC08g01410D, BnaC08g14600D, BnaC06g40040D, BnaA06g37620D, BnaC02g16…
GO:0001666	response to hypoxia	P	1.7e-07	3.5e-09	45	440	0.0160371	0.00563525	BnaC03g28310D, BnaC09g03400D, BnaC07g35950D, BnaA04g05430D, BnaA04g05420D, BnaA02g31430D, BnaA02g33910D, BnaAnng18700D, BnaA03g23810D, BnaAnng05950D, BnaA03g02640D, BnaC06g24380D, BnaC06g34630D, BnaC02g43600D, BnaA06g23810D, BnaA10g22680D, BnaA06g18440D, BnaC09g47250D, BnaA07g33580D, BnaA06g27000D, BnaA02g01560D, BnaCnng58920D, BnaA01g19990D, BnaC07g25140D, BnaA08g22130D, BnaAnng28220D, BnaC06g23…
GO:0043492	ATPase activity, coupled to movement of substances	F	1.7e-07	3.6e-09	66	800	0.023521	0.0102459	BnaA01g25310D, BnaCnng60360D, BnaC03g15300D, BnaC03g31360D, BnaC06g37180D, BnaA04g17140D, BnaA06g10230D, BnaC01g38000D, BnaC03g73610D, BnaA03g32640D, BnaA07g19210D, BnaC04g00490D, BnaC01g37960D, BnaA08g01230D, BnaA04g03860D, BnaA08g18750D, BnaC03g78180D, BnaA04g05540D, BnaC06g10670D, BnaC04g51510D, BnaA05g13980D, BnaA01g30060D, BnaA01g30040D, BnaC06g37230D, BnaC01g31340D, BnaC05g11890D, BnaC04g28…
GO:0042626	ATPase activity, coupled to transmembrane movement of substances	F	1.7e-07	3.6e-09	66	800	0.023521	0.0102459	BnaA01g25310D, BnaCnng60360D, BnaC03g15300D, BnaC03g31360D, BnaC06g37180D, BnaA04g17140D, BnaA06g10230D, BnaC01g38000D, BnaC03g73610D, BnaA03g32640D, BnaA07g19210D, BnaC04g00490D, BnaC01g37960D, BnaA08g01230D, BnaA04g03860D, BnaA08g18750D, BnaC03g78180D, BnaA04g05540D, BnaC06g10670D, BnaC04g51510D, BnaA05g13980D, BnaA01g30060D, BnaA01g30040D, BnaC06g37230D, BnaC01g31340D, BnaC05g11890D, BnaC04g28…
GO:0016820	hydrolase activity, acting on acid anhydrides, catalyzing transmembrane movement of substances	F	2.2e-07	4.7e-09	66	806	0.023521	0.0103227	BnaA01g25310D, BnaCnng60360D, BnaC03g15300D, BnaC03g31360D, BnaC06g37180D, BnaA04g17140D, BnaA06g10230D, BnaC01g38000D, BnaC03g73610D, BnaA03g32640D, BnaA07g19210D, BnaC04g00490D, BnaC01g37960D, BnaA08g01230D, BnaA04g03860D, BnaA08g18750D, BnaC03g78180D, BnaA04g05540D, BnaC06g10670D, BnaC04g51510D, BnaA05g13980D, BnaA01g30060D, BnaA01g30040D, BnaC06g37230D, BnaC01g31340D, BnaC05g11890D, BnaC04g28…
GO:0033036	macromolecule localization	P	3.2e-07	6.9e-09	330	6665	0.117605	0.0853612	BnaAnng23990D, BnaA06g18840D, BnaCnng28600D, BnaC09g03400D, BnaA10g28450D, BnaA09g45170D, BnaA01g28840D, BnaAnng22550D, BnaA04g25900D, BnaC09g34640D, BnaA06g10250D, BnaC05g43850D, BnaCnng28450D, BnaC06g22690D, BnaA02g27290D, BnaC08g36980D, BnaA03g27250D, BnaC08g28520D, BnaC03g58590D, BnaA03g27520D, BnaA09g48570D, BnaC02g00160D, BnaAnng21570D, BnaA04g29630D, BnaC02g32260D, BnaC04g45010D, BnaC02g42…
GO:0051179	localization	P	4.6e-07	1e-08	691	15748	0.246258	0.201691	BnaA03g29930D, BnaC03g00090D, BnaA06g18840D, BnaC08g41620D, BnaC09g03400D, BnaA04g17140D, BnaA04g25900D, BnaC09g34640D, BnaC08g39420D, BnaA02g30130D, BnaCnng04580D, BnaC05g43850D, BnaCnng28450D, BnaC09g28710D, BnaA02g27290D, BnaC04g46100D, BnaC03g58590D, BnaA03g27520D, BnaC02g00160D, BnaA04g29630D, BnaC02g32260D, BnaA01g01730D, BnaC04g45010D, BnaA09g51590D, BnaC06g06610D, BnaC02g42100D, BnaA01g00…
GO:0022804	active transmembrane transporter activity	F	4.8e-07	1e-08	132	2147	0.0470421	0.0274974	BnaA08g21830D, BnaC03g00090D, BnaCnng34530D, BnaC03g31360D, BnaA04g17140D, BnaC03g55460D, BnaC03g73610D, BnaC03g33320D, BnaA08g31640D, BnaA07g19210D, BnaC02g07510D, BnaC08g17890D, BnaA04g22280D, BnaC01g37960D, BnaA08g01230D, BnaC08g24720D, BnaC08g39000D, BnaAnng31830D, BnaA04g04020D, BnaA03g04470D, BnaC04g51510D, BnaA05g13980D, BnaA01g30060D, BnaC03g44480D, BnaA06g27700D, BnaC06g37230D, BnaC02g20…
GO:0015405	P-P-bond-hydrolysis-driven transmembrane transporter activity	F	7.9e-07	1.7e-08	74	986	0.0263721	0.0126281	BnaA01g25310D, BnaA08g21830D, BnaA08g21850D, BnaCnng60360D, BnaC03g15300D, BnaC03g31360D, BnaC06g37180D, BnaA04g17140D, BnaA06g10230D, BnaC01g38000D, BnaC03g73610D, BnaA03g32640D, BnaA07g19210D, BnaC08g17890D, BnaC04g00490D, BnaC01g37960D, BnaA08g01230D, BnaA04g03860D, BnaA08g18750D, BnaC03g78180D, BnaA04g05540D, BnaC06g10670D, BnaC04g51510D, BnaA05g13980D, BnaA01g30060D, BnaA01g30040D, BnaC06g37…
GO:1902582	single-organism intracellular transport	P	8.4e-07	1.9e-08	287	5703	0.102281	0.0730405	BnaAnng23990D, BnaA06g18840D, BnaC09g03400D, BnaC08g35770D, BnaA10g28450D, BnaC03g23130D, BnaA09g45170D, BnaA01g28840D, BnaAnng22550D, BnaA04g25900D, BnaC09g34640D, BnaC05g43850D, BnaCnng28450D, BnaC06g22690D, BnaA02g27290D, BnaC08g36980D, BnaA03g27250D, BnaC08g28520D, BnaC03g58590D, BnaA03g27520D, BnaA09g48570D, BnaC02g00160D, BnaAnng21570D, BnaC04g45010D, BnaC02g42100D, BnaA05g28580D, BnaC02g40…
GO:0015399	primary active transmembrane transporter activity	F	1.1e-06	2.3e-08	74	994	0.0263721	0.0127305	BnaA01g25310D, BnaA08g21830D, BnaA08g21850D, BnaCnng60360D, BnaC03g15300D, BnaC03g31360D, BnaC06g37180D, BnaA04g17140D, BnaA06g10230D, BnaC01g38000D, BnaC03g73610D, BnaA03g32640D, BnaA07g19210D, BnaC08g17890D, BnaC04g00490D, BnaC01g37960D, BnaA08g01230D, BnaA04g03860D, BnaA08g18750D, BnaC03g78180D, BnaA04g05540D, BnaC06g10670D, BnaC04g51510D, BnaA05g13980D, BnaA01g30060D, BnaA01g30040D, BnaC06g37…
GO:0036294	cellular response to decreased oxygen levels	P	3.2e-06	7.2e-08	20	118	0.00712758	0.00151127	BnaA02g01560D, BnaCnng58920D, BnaA09g39860D, BnaC09g03400D, BnaA08g22130D, BnaC07g35950D, BnaAnng28220D, BnaA02g31430D, BnaA01g00520D, BnaC03g49410D, BnaAnng33930D, BnaC02g40040D, BnaC08g18680D, BnaA09g04040D, BnaC06g38190D, BnaCnng77080D, BnaA06g23810D, BnaA02g34440D, BnaA07g33580D, BnaC07g28420D
GO:0071453	cellular response to oxygen levels	P	3.2e-06	7.2e-08	20	118	0.00712758	0.00151127	BnaA02g01560D, BnaCnng58920D, BnaA09g39860D, BnaC09g03400D, BnaA08g22130D, BnaC07g35950D, BnaAnng28220D, BnaA02g31430D, BnaA01g00520D, BnaC03g49410D, BnaAnng33930D, BnaC02g40040D, BnaC08g18680D, BnaA09g04040D, BnaC06g38190D, BnaCnng77080D, BnaA06g23810D, BnaA02g34440D, BnaA07g33580D, BnaC07g28420D
GO:0071456	cellular response to hypoxia	P	3.5e-06	7.9e-08	19	107	0.0067712	0.00137039	BnaA02g01560D, BnaCnng58920D, BnaC09g03400D, BnaA08g22130D, BnaC07g35950D, BnaAnng28220D, BnaA02g31430D, BnaA01g00520D, BnaC03g49410D, BnaAnng33930D, BnaC02g40040D, BnaC08g18680D, BnaA09g04040D, BnaC06g38190D, BnaCnng77080D, BnaA06g23810D, BnaA02g34440D, BnaA07g33580D, BnaC07g28420D
GO:0046907	intracellular transport	P	3.8e-06	8.7e-08	303	6192	0.107983	0.0793033	BnaAnng23990D, BnaA03g29930D, BnaA06g18840D, BnaC09g03400D, BnaC08g35770D, BnaA10g28450D, BnaC03g23130D, BnaA09g45170D, BnaA01g28840D, BnaAnng22550D, BnaA04g25900D, BnaC09g34640D, BnaC05g43850D, BnaCnng28450D, BnaC06g22690D, BnaA02g27290D, BnaC08g36980D, BnaA03g27250D, BnaC08g28520D, BnaC03g58590D, BnaA03g27520D, BnaA09g48570D, BnaC02g00160D, BnaAnng21570D, BnaC04g45010D, BnaC02g42100D, BnaA05g28…
GO:0016758	transferase activity, transferring hexosyl groups	F	4.7e-06	1.1e-07	94	1437	0.0334996	0.0184042	BnaCnng24210D, BnaCnng62600D, BnaA08g11380D, BnaCnng13310D, BnaC04g44730D, BnaC01g25620D, BnaA05g28060D, BnaCnng38050D, BnaA10g11500D, BnaC08g36500D, BnaA06g07180D, BnaA09g40090D, BnaA08g25540D, BnaC02g11500D, BnaCnng47330D, BnaA09g40070D, BnaCnng35910D, BnaC04g08450D, BnaA02g35250D, BnaA03g36440D, BnaA05g16350D, BnaC04g11500D, BnaC03g67970D, BnaA07g03360D, BnaA03g16830D, BnaC08g46320D, BnaA01g06…
GO:1990135	flavonoid sulfotransferase activity	F	4.8e-06	1.1e-07	10	23	0.00356379	0.00029457	BnaA03g47920D, BnaA02g27300D, BnaC09g11650D, BnaA02g27280D, BnaC02g35160D, BnaA02g27290D, BnaC09g52480D, BnaC02g35150D, BnaC09g22150D, BnaA09g53470D
GO:0080118	brassinosteroid sulfotransferase activity	F	4.8e-06	1.1e-07	8	11	0.00285103	0.000140881	BnaA02g27300D, BnaA02g27280D, BnaC02g35160D, BnaA02g27290D, BnaC09g52480D, BnaC02g35150D, BnaC09g22150D, BnaA09g53470D
GO:0010324	membrane invagination	P	5.7e-06	1.3e-07	6	3	0.00213828	3.84221e-05	BnaCnng58920D, BnaC06g38190D, BnaA06g23810D, BnaA02g34440D, BnaC03g49410D, BnaA07g33580D
GO:0009916	alternative oxidase activity	F	7.1e-06	1.7e-07	7	7	0.00249465	8.96516e-05	BnaA05g35970D, BnaC05g30210D, BnaC01g31620D, BnaCnng63430D, BnaA03g36620D, BnaA01g24740D, BnaA05g17260D
GO:0009625	response to insect	P	8.2e-06	1.9e-07	40	425	0.0142552	0.00544314	BnaA01g01220D, BnaA05g12160D, BnaC04g14500D, BnaA05g27280D, BnaC08g49140D, BnaC08g38690D, BnaA04g05430D, BnaA04g05420D, BnaA06g13200D, BnaA03g13820D, BnaAnng41370D, BnaA08g11930D, BnaCnng77100D, BnaC08g07580D, BnaA02g29390D, BnaC03g54940D, BnaC09g01820D, BnaC03g16740D, BnaC07g10790D, BnaA04g05470D, BnaC03g73490D, BnaC06g28110D, BnaA06g38950D, BnaA06g10400D, BnaC04g28220D, BnaA07g21980D, BnaC02g42…
GO:0010583	response to cyclopentenone	P	1.1e-05	2.5e-07	48	569	0.0171062	0.0072874	BnaA10g03720D, BnaC07g36580D, BnaC07g25010D, BnaA10g08320D, BnaC03g00290D, BnaCnng64910D, BnaC03g51650D, BnaC08g38850D, BnaC04g40560D, BnaA08g28350D, BnaCnng38440D, BnaC09g15100D, BnaA04g28600D, BnaA06g31640D, BnaA07g19210D, BnaA01g24190D, BnaC04g00490D, BnaC08g37930D, BnaA05g12550D, BnaC07g39600D, BnaA06g21920D, BnaC07g38760D, BnaA09g07870D, BnaCnng16590D, BnaC06g31460D, BnaC08g46320D, BnaA01g20…
GO:0009643	photosynthetic acclimation	P	1.2e-05	2.7e-07	9	19	0.00320741	0.00024334	BnaA02g06790D, BnaC09g35160D, BnaC03g11570D, BnaA06g18210D, BnaA01g36280D, BnaA10g12780D, BnaA03g09250D, BnaA06g19890D, BnaA06g19880D
GO:0009816	defense response to bacterium, incompatible interaction	P	1.4e-05	3.4e-07	29	258	0.010335	0.0033043	BnaA01g12590D, BnaC09g03400D, BnaC07g35950D, BnaA04g05430D, BnaA04g05420D, BnaA04g22680D, BnaA02g31430D, BnaA04g02730D, BnaC08g27590D, BnaC07g27910D, BnaA09g35410D, BnaCnng60310D, BnaC05g46580D, BnaC06g41760D, BnaA02g01560D, BnaA01g12670D, BnaAnng28220D, BnaC01g14390D, BnaC03g44690D, BnaC02g40040D, BnaA09g04040D, BnaC08g26770D, BnaA02g21850D, BnaA03g37660D, BnaA08g10530D, BnaA09g23770D, BnaC04g56…
GO:0010337	regulation of salicylic acid metabolic process	P	1.9e-05	4.5e-07	13	54	0.00463293	0.000691598	BnaC09g03400D, BnaAnng28220D, BnaA08g17810D, BnaA02g31430D, BnaC06g23400D, BnaA07g22510D, BnaC02g40040D, BnaC03g59280D, BnaA09g04040D, BnaC06g34630D, BnaC07g28420D, BnaA08g18370D, BnaC03g58590D
GO:0019222	regulation of metabolic process	P	2.2e-05	5.4e-07	555	12658	0.19779	0.162116	BnaC05g17200D, BnaC06g12880D, BnaA03g27400D, BnaA09g32960D, BnaA03g08120D, BnaA06g27060D, BnaA03g19860D, BnaA02g23680D, BnaC09g03400D, BnaAnng28960D, BnaA09g24500D, BnaA03g43860D, BnaC07g32600D, BnaC03g33170D, BnaC05g40340D, BnaA04g25900D, BnaC09g34640D, BnaC08g40640D, BnaA04g26230D, BnaCnng04580D, BnaC05g43850D, BnaC03g50150D, BnaAnng05950D, BnaC08g10960D, BnaCnng28450D, BnaA02g27290D, BnaA06g10…
GO:0016757	transferase activity, transferring glycosyl groups	F	5.7e-05	1.4e-06	119	2071	0.0424091	0.0265241	BnaCnng62600D, BnaA08g11380D, BnaC01g25620D, BnaC04g01980D, BnaA06g07180D, BnaA09g40090D, BnaC04g08450D, BnaA02g35250D, BnaA05g16350D, BnaC08g46320D, BnaA01g06740D, BnaC01g31820D, BnaC08g01410D, BnaA02g35330D, BnaC08g14600D, BnaA04g04400D, BnaC03g71890D, BnaC03g35120D, BnaA03g29890D, BnaA06g40960D, BnaC02g11480D, BnaC03g26760D, BnaCnng63310D, BnaC05g04390D, BnaC03g56970D, BnaC08g39920D, BnaA03g03…
GO:0031323	regulation of cellular metabolic process	P	7.8e-05	1.9e-06	508	11586	0.181041	0.148386	BnaC05g17200D, BnaC06g12880D, BnaA03g27400D, BnaA09g32960D, BnaA03g08120D, BnaA06g27060D, BnaA03g19860D, BnaA02g23680D, BnaC09g03400D, BnaAnng28960D, BnaA09g24500D, BnaC07g32600D, BnaC03g33170D, BnaC05g40340D, BnaA04g25900D, BnaC09g34640D, BnaC08g40640D, BnaA04g26230D, BnaCnng04580D, BnaC05g43850D, BnaC03g50150D, BnaAnng05950D, BnaC08g10960D, BnaCnng28450D, BnaA02g27290D, BnaA06g10400D, BnaC03g58…
GO:0006820	anion transport	P	8.9e-05	2.2e-06	166	3158	0.0591589	0.0404457	BnaA02g12360D, BnaC08g41620D, BnaCnng28600D, BnaA03g02020D, BnaC09g10840D, BnaAnng11580D, BnaC03g55460D, BnaA02g30130D, BnaCnng04580D, BnaA08g31640D, BnaA01g04930D, BnaC04g46100D, BnaA07g19210D, BnaA04g22280D, BnaC09g45960D, BnaA02g14850D, BnaC03g58590D, BnaA03g27520D, BnaC04g28220D, BnaAnng31830D, BnaA09g48570D, BnaA04g29630D, BnaC02g32260D, BnaA01g01730D, BnaCnng20160D, BnaC06g06610D, BnaA04g04…
GO:0048523	negative regulation of cellular process	P	9.5e-05	2.3e-06	206	4099	0.0734141	0.0524974	BnaAnng23990D, BnaA09g32960D, BnaA02g23680D, BnaC09g03400D, BnaA09g24500D, BnaCnng64790D, BnaA10g28450D, BnaC03g33170D, BnaA04g25900D, BnaC05g33170D, BnaA04g26230D, BnaCnng04580D, BnaC08g10960D, BnaCnng28450D, BnaC06g22690D, BnaC08g36980D, BnaC08g28520D, BnaC02g04270D, BnaC03g58590D, BnaA03g27520D, BnaA09g48570D, BnaC07g16940D, BnaC04g45010D, BnaC02g42100D, BnaA01g11880D, BnaA05g28580D, BnaC02g40…
GO:0051649	establishment of localization in cell	P	0.0001	2.6e-06	307	6552	0.109408	0.0839139	BnaAnng23990D, BnaA03g29930D, BnaA06g18840D, BnaC09g03400D, BnaC08g35770D, BnaA10g28450D, BnaC03g23130D, BnaA09g45170D, BnaA01g28840D, BnaAnng22550D, BnaA04g25900D, BnaC09g34640D, BnaC05g43850D, BnaCnng28450D, BnaC06g22690D, BnaA02g27290D, BnaC08g36980D, BnaA03g27250D, BnaC08g28520D, BnaC03g58590D, BnaA03g27520D, BnaA09g48570D, BnaC02g00160D, BnaAnng21570D, BnaC04g45010D, BnaC02g42100D, BnaA05g28…
GO:0010112	regulation of systemic acquired resistance	P	0.0001	2.6e-06	12	54	0.00427655	0.000691598	BnaA02g01560D, BnaA09g04040D, BnaC03g71460D, BnaC06g34630D, BnaC09g03400D, BnaAnng28220D, BnaA02g31430D, BnaC06g23400D, BnaA07g22510D, BnaA03g04250D, BnaC02g40040D, BnaC07g28420D
GO:0022857	transmembrane transporter activity	F	0.00011	2.7e-06	197	3896	0.0702067	0.0498975	BnaC03g00090D, BnaCnng34530D, BnaC03g31360D, BnaA04g17140D, BnaC03g55460D, BnaA02g30130D, BnaC03g33320D, BnaA09g51590D, BnaA03g04470D, BnaA01g30060D, BnaC08g40880D, BnaA06g40390D, BnaA06g27700D, BnaC06g37230D, BnaC02g20430D, BnaCnng31250D, BnaA02g16040D, BnaCnng05320D, BnaA06g35450D, BnaC04g40750D, BnaA03g36090D, BnaC06g37190D, BnaA01g24360D, BnaC03g00400D, BnaA03g32690D, BnaC05g25060D, BnaA02g30…
GO:0042991	transcription factor import into nucleus	P	0.00011	2.8e-06	20	153	0.00712758	0.00195953	BnaA03g57880D, BnaA06g18840D, BnaC02g00160D, BnaC01g28510D, BnaA07g38140D, BnaAnng38720D, BnaC04g31940D, BnaC06g42850D, BnaA02g13980D, BnaC03g44480D, BnaA09g24300D, BnaAnng41200D, BnaC07g47900D, BnaA09g34370D, BnaA10g21550D, BnaC08g31500D, BnaA02g10340D, BnaA03g47300D, BnaC07g39520D, BnaA09g05380D
GO:0010345	suberin biosynthetic process	P	0.00012	3e-06	12	55	0.00427655	0.000704406	BnaC02g30500D, BnaA06g18840D, BnaC02g10430D, BnaA02g32980D, BnaA06g36580D, BnaC07g44720D, BnaCnng31250D, BnaA02g22340D, BnaC07g17300D, BnaA10g02480D, BnaA02g07380D, BnaA10g13850D
GO:0005509	calcium ion binding	F	0.00013	3.2e-06	67	999	0.0238774	0.0127946	BnaA06g01060D, BnaC02g06910D, BnaA03g06260D, BnaA10g08320D, BnaC07g25470D, BnaA04g05850D, BnaA06g33520D, BnaC03g23130D, BnaA03g02020D, BnaA04g02760D, BnaC07g01540D, BnaC08g36980D, BnaA01g16310D, BnaA03g27250D, BnaC08g41320D, BnaA09g36820D, BnaC08g28520D, BnaC03g24090D, BnaC03g32250D, BnaA02g12470D, BnaCnng69860D, BnaA02g29610D, BnaA03g19320D, BnaC05g29540D, BnaC06g12520D, BnaC06g43540D, BnaC01g19…
GO:0006968	cellular defense response	P	0.00014	3.5e-06	8	20	0.00285103	0.000256148	BnaC04g28220D, BnaA05g27280D, BnaC08g49140D, BnaA06g21360D, BnaA03g31960D, BnaA04g05470D, BnaC03g73490D, BnaC03g52210D
GO:0010185	regulation of cellular defense response	P	0.00014	3.5e-06	8	20	0.00285103	0.000256148	BnaC04g28220D, BnaA05g27280D, BnaC08g49140D, BnaA06g21360D, BnaA03g31960D, BnaA04g05470D, BnaC03g73490D, BnaC03g52210D
GO:1903506	regulation of nucleic acid-templated transcription	P	0.00015	3.8e-06	397	8834	0.141483	0.11314	BnaC05g17200D, BnaC06g12880D, BnaA03g27400D, BnaA09g32960D, BnaA03g08120D, BnaA06g27060D, BnaA03g19860D, BnaAnng28960D, BnaC07g32600D, BnaC05g40340D, BnaA04g25900D, BnaC09g34640D, BnaC08g40640D, BnaA04g26230D, BnaCnng04580D, BnaC03g50150D, BnaAnng05950D, BnaC08g10960D, BnaA06g10400D, BnaC03g23850D, BnaC07g16940D, BnaC08g48630D, BnaCnng49280D, BnaAnng07270D, BnaC01g21940D, BnaA05g28580D, BnaC06g40…
GO:0006355	regulation of transcription, DNA-templated	P	0.00015	3.8e-06	397	8834	0.141483	0.11314	BnaC05g17200D, BnaC06g12880D, BnaA03g27400D, BnaA09g32960D, BnaA03g08120D, BnaA06g27060D, BnaA03g19860D, BnaAnng28960D, BnaC07g32600D, BnaC05g40340D, BnaA04g25900D, BnaC09g34640D, BnaC08g40640D, BnaA04g26230D, BnaCnng04580D, BnaC03g50150D, BnaAnng05950D, BnaC08g10960D, BnaA06g10400D, BnaC03g23850D, BnaC07g16940D, BnaC08g48630D, BnaCnng49280D, BnaAnng07270D, BnaC01g21940D, BnaA05g28580D, BnaC06g40…
GO:0043225	anion transmembrane-transporting ATPase activity	F	0.00016	4e-06	14	79	0.00498931	0.00101178	BnaCnng78100D, BnaA04g05540D, BnaA08g17810D, BnaC06g37180D, BnaC06g37190D, BnaC05g31240D, BnaC03g59280D, BnaA06g10230D, BnaC06g37200D, BnaA02g18110D, BnaC06g37230D, BnaC05g11890D, BnaC04g28280D, BnaCnng20520D
GO:2001141	regulation of RNA biosynthetic process	P	0.00017	4.4e-06	397	8849	0.141483	0.113332	BnaC05g17200D, BnaC06g12880D, BnaA03g27400D, BnaA09g32960D, BnaA03g08120D, BnaA06g27060D, BnaA03g19860D, BnaAnng28960D, BnaC07g32600D, BnaC05g40340D, BnaA04g25900D, BnaC09g34640D, BnaC08g40640D, BnaA04g26230D, BnaCnng04580D, BnaC03g50150D, BnaAnng05950D, BnaC08g10960D, BnaA06g10400D, BnaC03g23850D, BnaC07g16940D, BnaC08g48630D, BnaCnng49280D, BnaAnng07270D, BnaC01g21940D, BnaA05g28580D, BnaC06g40…
GO:0015415	phosphate ion transmembrane-transporting ATPase activity	F	0.00025	6.5e-06	7	15	0.00249465	0.000192111	BnaC06g37200D, BnaA02g18110D, BnaCnng78100D, BnaC06g37230D, BnaC06g37180D, BnaC06g37190D, BnaCnng20520D
GO:0031930	mitochondria-nucleus signaling pathway	P	0.00025	6.6e-06	6	9	0.00213828	0.000115266	BnaC05g30210D, BnaC01g31620D, BnaCnng63430D, BnaA03g36620D, BnaA01g24740D, BnaA05g17260D
GO:0051252	regulation of RNA metabolic process	P	0.00032	8.5e-06	397	8915	0.141483	0.114178	BnaC05g17200D, BnaC06g12880D, BnaA03g27400D, BnaA09g32960D, BnaA03g08120D, BnaA06g27060D, BnaA03g19860D, BnaAnng28960D, BnaC07g32600D, BnaC05g40340D, BnaA04g25900D, BnaC09g34640D, BnaC08g40640D, BnaA04g26230D, BnaCnng04580D, BnaC03g50150D, BnaAnng05950D, BnaC08g10960D, BnaA06g10400D, BnaC03g23850D, BnaC07g16940D, BnaC08g48630D, BnaCnng49280D, BnaAnng07270D, BnaC01g21940D, BnaA05g28580D, BnaC06g40…
GO:0016679	oxidoreductase activity, acting on diphenols and related substances as donors	F	0.00033	8.7e-06	21	181	0.00748396	0.00231814	BnaA05g35970D, BnaCnng43630D, BnaC01g31620D, BnaC08g12000D, BnaC02g40580D, BnaA01g24740D, BnaA05g17260D, BnaC08g40880D, BnaC05g30210D, BnaC04g04810D, BnaAnng08180D, BnaA06g40970D, BnaC08g39030D, BnaC08g38060D, BnaA04g29320D, BnaA02g31990D, BnaC02g15740D, BnaCnng63430D, BnaA03g36620D, BnaAnng34010D, BnaC04g47080D
GO:0009889	regulation of biosynthetic process	P	0.00037	9.7e-06	456	10433	0.162509	0.133619	BnaC05g17200D, BnaC06g12880D, BnaA03g27400D, BnaA09g32960D, BnaA03g08120D, BnaA06g27060D, BnaA03g19860D, BnaC09g03400D, BnaAnng28960D, BnaA09g24500D, BnaC07g32600D, BnaC03g33170D, BnaC05g40340D, BnaA04g25900D, BnaC09g34640D, BnaC08g40640D, BnaA04g26230D, BnaCnng04580D, BnaC05g43850D, BnaC03g50150D, BnaAnng05950D, BnaC08g10960D, BnaA06g10400D, BnaC03g23850D, BnaC07g16940D, BnaC08g48630D, BnaCnng49…
GO:0002831	regulation of response to biotic stimulus	P	0.00039	1e-05	19	154	0.0067712	0.00197234	BnaA02g01560D, BnaAnng23990D, BnaC02g26030D, BnaC03g67380D, BnaC09g03400D, BnaAnng28220D, BnaA02g31430D, BnaC06g23400D, BnaA07g20110D, BnaA07g22510D, BnaA03g04250D, BnaC02g40040D, BnaC08g07580D, BnaA09g04040D, BnaC03g71460D, BnaA03g05130D, BnaC06g34630D, BnaA01g05060D, BnaC07g28420D
GO:0032787	monocarboxylic acid metabolic process	P	0.00039	1.1e-05	293	6328	0.104419	0.0810451	BnaAnng23990D, BnaC08g41620D, BnaC07g50260D, BnaC09g03400D, BnaC09g33200D, BnaA03g28460D, BnaA08g02130D, BnaA10g28450D, BnaC09g34640D, BnaA06g10250D, BnaCnng28450D, BnaC02g22230D, BnaC06g22690D, BnaA02g27290D, BnaC08g14190D, BnaC08g36980D, BnaA03g27250D, BnaA02g14850D, BnaA06g10400D, BnaC03g58590D, BnaA01g01730D, BnaCnng57040D, BnaC02g42100D, BnaC05g51350D, BnaC06g40040D, BnaC02g40040D, BnaC02g30…
GO:0004649	poly(ADP-ribose) glycohydrolase activity	F	0.00041	1.1e-05	5	5	0.0017819	6.40369e-05	BnaA04g18150D, BnaC04g42210D, BnaA04g18140D, BnaC04g42220D, BnaA05g11130D
GO:0032101	regulation of response to external stimulus	P	0.00043	1.2e-05	20	170	0.00712758	0.00217725	BnaA02g01560D, BnaAnng23990D, BnaC02g26030D, BnaC03g67380D, BnaC09g03400D, BnaAnng28220D, BnaA02g31430D, BnaC06g23400D, BnaA07g20110D, BnaA07g22510D, BnaA03g04250D, BnaC02g40040D, BnaC08g07580D, BnaA09g04040D, BnaC03g71460D, BnaA03g05130D, BnaC06g34630D, BnaA02g04730D, BnaA01g05060D, BnaC07g28420D
GO:0005516	calmodulin binding	F	0.00047	1.3e-05	54	782	0.0192445	0.0100154	BnaA01g25310D, BnaC03g15300D, BnaC09g03400D, BnaC07g06510D, BnaA02g31430D, BnaA06g24140D, BnaA02g20700D, BnaC02g46140D, BnaC04g27770D, BnaC02g27050D, BnaA08g11930D, BnaA06g35400D, BnaA08g28380D, BnaA01g37320D, BnaC06g22290D, BnaAnng27540D, BnaA05g25790D, BnaC02g34260D, BnaC01g37540D, BnaA08g18750D, BnaA03g20050D, BnaAnng28220D, BnaC06g23400D, BnaA07g22510D, BnaA07g02640D, BnaC02g40040D, BnaC01g31…
GO:0019438	aromatic compound biosynthetic process	P	0.00047	1.3e-05	584	13777	0.208125	0.176447	BnaC05g17200D, BnaA06g18840D, BnaC08g41620D, BnaC06g12880D, BnaA03g27400D, BnaA09g32960D, BnaA03g08120D, BnaA06g27060D, BnaA03g19860D, BnaC09g03400D, BnaAnng28960D, BnaC07g32600D, BnaC05g40340D, BnaA04g25900D, BnaC09g34640D, BnaC08g40640D, BnaA04g26230D, BnaCnng04580D, BnaC03g50150D, BnaAnng05950D, BnaC08g10960D, BnaCnng28450D, BnaA02g27290D, BnaA06g10400D, BnaA06g40660D, BnaC03g58590D, BnaC03g23…
GO:0051245	negative regulation of cellular defense response	P	0.00056	1.5e-05	6	11	0.00213828	0.000140881	BnaC04g28220D, BnaA05g27280D, BnaC08g49140D, BnaA03g31960D, BnaA04g05470D, BnaC03g73490D
GO:0003677	DNA binding	F	0.00057	1.6e-05	323	7112	0.11511	0.0910861	BnaAnng23990D, BnaC05g17200D, BnaC06g12880D, BnaA03g27400D, BnaA03g08120D, BnaA06g27060D, BnaA03g19860D, BnaC09g03400D, BnaAnng28960D, BnaA08g09860D, BnaC07g32600D, BnaC03g33170D, BnaC03g10310D, BnaA04g25900D, BnaC05g33170D, BnaA04g26460D, BnaCnng04580D, BnaC03g50150D, BnaAnng05950D, BnaC08g10960D, BnaA08g25980D, BnaA08g08310D, BnaC03g23850D, BnaA06g35100D, BnaC07g16940D, BnaC08g48630D, BnaCnng49…
GO:0070417	cellular response to cold	P	0.00068	1.9e-05	15	105	0.00534569	0.00134477	BnaC05g17200D, BnaA09g39860D, BnaA06g27060D, BnaAnng28960D, BnaC06g38250D, BnaC07g29890D, BnaA06g21090D, BnaA06g15870D, BnaC06g39820D, BnaC03g52390D, BnaC03g52400D, BnaA02g01140D, BnaC06g00880D, BnaA10g27820D, BnaC02g04270D
GO:0043565	sequence-specific DNA binding	F	0.00091	2.5e-05	90	1566	0.0320741	0.0200564	BnaAnng23990D, BnaC02g26030D, BnaC06g12880D, BnaC03g67380D, BnaC05g21480D, BnaA03g19860D, BnaC09g03400D, BnaAnng01980D, BnaA02g31430D, BnaA06g24140D, BnaA07g20110D, BnaC07g32600D, BnaC07g08810D, BnaC08g42470D, BnaC05g33170D, BnaC03g16740D, BnaC08g39400D, BnaA01g27940D, BnaC03g23850D, BnaA05g20490D, BnaC07g16940D, BnaAnng28220D, BnaC06g23400D, BnaA07g22510D, BnaA01g11880D, BnaC01g33270D, BnaC04g06…
GO:0022891	substrate-specific transmembrane transporter activity	F	0.00095	2.6e-05	166	3314	0.0591589	0.0424436	BnaA08g21830D, BnaC03g00090D, BnaCnng34530D, BnaC03g31360D, BnaA03g43670D, BnaAnng11580D, BnaC03g55460D, BnaA03g37130D, BnaA02g30130D, BnaC03g73610D, BnaC03g33320D, BnaA07g19210D, BnaC02g07510D, BnaC08g17890D, BnaA04g22280D, BnaC01g37960D, BnaC08g24720D, BnaAnng34010D, BnaAnng31830D, BnaCnng20160D, BnaA09g51590D, BnaA04g04020D, BnaA03g04470D, BnaC04g51510D, BnaA05g13980D, BnaA01g30060D, BnaC08g40…
GO:0009813	flavonoid biosynthetic process	P	0.0011	3.2e-05	65	1038	0.0231646	0.0132941	BnaA08g11380D, BnaC08g12000D, BnaC08g18280D, BnaAnng22550D, BnaCnng47330D, BnaC08g38060D, BnaA04g05470D, BnaA09g36820D, BnaC08g28520D, BnaA06g27000D, BnaUnng03540D, BnaC04g28220D, BnaA03g16830D, BnaA06g35100D, BnaC08g49480D, BnaC02g32260D, BnaA03g20490D, BnaC06g30820D, BnaC07g29940D, BnaC02g30500D, BnaA06g12890D, BnaA06g36580D, BnaA03g31960D, BnaA04g07430D, BnaA01g01220D, BnaC08g20260D, BnaA05g27…
GO:0050691	regulation of defense response to virus by host	P	0.0012	3.2e-05	5	7	0.0017819	8.96516e-05	BnaAnng23990D, BnaC02g26030D, BnaC03g67380D, BnaA07g20110D, BnaA01g05060D
GO:0035264	multicellular organism growth	P	0.0013	3.7e-05	7	21	0.00249465	0.000268955	BnaA05g20490D, BnaC07g16940D, BnaC05g21480D, BnaA01g26030D, BnaC03g58080D, BnaA09g27780D, BnaA08g18790D
GO:0016887	ATPase activity	F	0.0013	3.8e-05	104	1898	0.0370634	0.0243084	BnaA03g08120D, BnaA10g14690D, BnaC02g06950D, BnaC03g31360D, BnaA04g17140D, BnaC03g10310D, BnaC03g73610D, BnaA07g19210D, BnaC01g37960D, BnaA08g01230D, BnaC02g00160D, BnaC07g25170D, BnaC05g47920D, BnaC04g51510D, BnaA05g13980D, BnaA01g30060D, BnaC06g37230D, BnaC05g33020D, BnaA05g32540D, BnaA05g32310D, BnaC06g01320D, BnaCnng78100D, BnaC08g49140D, BnaC08g49560D, BnaC04g40750D, BnaC05g29600D, BnaA03g58…
GO:0080167	response to karrikin	P	0.0014	3.9e-05	50	736	0.017819	0.00942623	BnaA10g08320D, BnaC08g26890D, BnaC09g01820D, BnaA08g31640D, BnaA09g30920D, BnaA01g16310D, BnaA01g27940D, BnaC06g31430D, BnaC08g46320D, BnaC06g38790D, BnaA03g04470D, BnaC08g01410D, BnaA09g35510D, BnaC01g19450D, BnaA02g35350D, BnaC09g07640D, BnaC02g37440D, BnaA02g09590D, BnaCnng76580D, BnaA04g20290D, BnaC05g50840D, BnaC07g20680D, BnaA01g36280D, BnaC08g39050D, BnaA09g34850D, BnaA01g00640D, BnaC06g25…
GO:0010120	camalexin biosynthetic process	P	0.0016	4.4e-05	10	51	0.00356379	0.000653176	BnaC03g21360D, BnaCnng66020D, BnaC04g14500D, BnaC02g22230D, BnaA03g17820D, BnaA04g22040D, BnaA02g35860D, BnaA06g18440D, BnaA07g22640D, BnaC04g06800D
GO:0052317	camalexin metabolic process	P	0.0016	4.4e-05	10	51	0.00356379	0.000653176	BnaC03g21360D, BnaCnng66020D, BnaC04g14500D, BnaC02g22230D, BnaA03g17820D, BnaA04g22040D, BnaA02g35860D, BnaA06g18440D, BnaA07g22640D, BnaC04g06800D
GO:0016682	oxidoreductase activity, acting on diphenols and related substances as donors, oxygen as acceptor	F	0.0017	4.8e-05	16	129	0.00570207	0.00165215	BnaA05g35970D, BnaCnng43630D, BnaC01g31620D, BnaC08g12000D, BnaA01g24740D, BnaA05g17260D, BnaC05g30210D, BnaC04g04810D, BnaAnng08180D, BnaA06g40970D, BnaC08g38060D, BnaA04g29320D, BnaC02g15740D, BnaCnng63430D, BnaA03g36620D, BnaC04g47080D
GO:0035435	phosphate ion transmembrane transport	P	0.0017	4.8e-05	7	22	0.00249465	0.000281762	BnaC06g37200D, BnaA02g18110D, BnaCnng78100D, BnaC06g37230D, BnaC06g37180D, BnaC06g37190D, BnaCnng20520D
GO:0010468	regulation of gene expression	P	0.0018	5.3e-05	430	9960	0.153243	0.127561	BnaC05g17200D, BnaC06g12880D, BnaA03g27400D, BnaA09g32960D, BnaA03g08120D, BnaA06g27060D, BnaA03g19860D, BnaAnng28960D, BnaA09g24500D, BnaA03g43860D, BnaC07g32600D, BnaC03g33170D, BnaC05g40340D, BnaA04g25900D, BnaC09g34640D, BnaC08g40640D, BnaA04g26230D, BnaCnng04580D, BnaC05g43850D, BnaC03g50150D, BnaAnng05950D, BnaC08g10960D, BnaA06g10400D, BnaC03g23850D, BnaC07g16940D, BnaC08g48630D, BnaCnng49…
GO:0006855	drug transmembrane transport	P	0.0021	6e-05	28	328	0.00997862	0.00420082	BnaA03g57880D, BnaCnng60360D, BnaC08g49140D, BnaC04g40750D, BnaA03g58040D, BnaA04g17140D, BnaA06g10230D, BnaA08g06670D, BnaC05g25060D, BnaA08g31640D, BnaCnng47370D, BnaA07g19210D, BnaC04g00490D, BnaC08g39000D, BnaA05g32820D, BnaAnng38720D, BnaCnng45550D, BnaC04g10860D, BnaC08g16540D, BnaC03g44480D, BnaAnng41200D, BnaA06g19930D, BnaA08g31540D, BnaC07g47900D, BnaC05g11890D, BnaCnng47680D, BnaC05g37…
GO:0006457	protein folding	P	0.0021	6.2e-05	72	1213	0.0256593	0.0155353	BnaA10g01680D, BnaC06g33810D, BnaA02g06890D, BnaA10g08320D, BnaA01g16730D, BnaCnng42080D, BnaC07g32600D, BnaC03g44070D, BnaC09g34640D, BnaAnng13800D, BnaA10g18890D, BnaA09g55990D, BnaC08g41760D, BnaA10g12710D, BnaC01g09970D, BnaA05g00520D, BnaA10g25000D, BnaA10g01350D, BnaA06g18100D, BnaA06g12090D, BnaC01g16210D, BnaC01g19450D, BnaC05g52180D, BnaC07g26590D, BnaA06g03820D, BnaA09g40360D, BnaA02g09…
GO:0031668	cellular response to extracellular stimulus	P	0.0021	6.2e-05	101	1856	0.0359943	0.0237705	BnaC09g10840D, BnaC03g55460D, BnaA03g37130D, BnaA02g30130D, BnaC04g46100D, BnaC08g35240D, BnaC09g45960D, BnaC02g04270D, BnaAnng31830D, BnaA06g35100D, BnaA04g29630D, BnaC08g46320D, BnaC08g01410D, BnaA03g17680D, BnaC02g14450D, BnaC09g29540D, BnaC02g43920D, BnaC07g13550D, BnaA09g20430D, BnaC07g22160D, BnaC04g35510D, BnaC05g50000D, BnaC07g48940D, BnaC08g49140D, BnaA06g00050D, BnaA02g26660D, BnaA03g59…
GO:0080044	quercetin 7-O-glucosyltransferase activity	F	0.0023	6.6e-05	12	78	0.00427655	0.000998975	BnaA08g11370D, BnaA03g16830D, BnaCnng47330D, BnaA05g07590D, BnaC04g08450D, BnaA08g11380D, BnaC04g08440D, BnaA08g11390D, BnaCnng24710D, BnaC03g26760D, BnaA01g03010D, BnaA04g21090D
GO:0071496	cellular response to external stimulus	P	0.0024	7.1e-05	101	1863	0.0359943	0.0238601	BnaC09g10840D, BnaC03g55460D, BnaA03g37130D, BnaA02g30130D, BnaC04g46100D, BnaC08g35240D, BnaC09g45960D, BnaC02g04270D, BnaAnng31830D, BnaA06g35100D, BnaA04g29630D, BnaC08g46320D, BnaC08g01410D, BnaA03g17680D, BnaC02g14450D, BnaC09g29540D, BnaC02g43920D, BnaC07g13550D, BnaA09g20430D, BnaC07g22160D, BnaC04g35510D, BnaC05g50000D, BnaC07g48940D, BnaC08g49140D, BnaA06g00050D, BnaA02g26660D, BnaA03g59…
GO:0034059	response to anoxia	P	0.0025	7.6e-05	7	24	0.00249465	0.000307377	BnaAnng13920D, BnaA09g39860D, BnaA04g27050D, BnaCnng52860D, BnaC04g39110D, BnaA05g27550D, BnaC04g51210D
GO:0008506	sucrose:proton symporter activity	F	0.0025	7.6e-05	7	24	0.00249465	0.000307377	BnaA10g30480D, BnaC09g49280D, BnaC07g13570D, BnaA03g01930D, BnaCnng07770D, BnaA03g52810D, BnaC03g02450D
GO:0009922	fatty acid elongase activity	F	0.0025	7.6e-05	7	24	0.00249465	0.000307377	BnaC02g30500D, BnaC05g00780D, BnaA06g36580D, BnaA02g22340D, BnaC07g17300D, BnaA10g02480D, BnaA10g00700D
GO:0044283	small molecule biosynthetic process	P	0.0025	7.7e-05	314	7043	0.111903	0.0902024	BnaAnng23990D, BnaC08g41620D, BnaA03g27400D, BnaC07g50260D, BnaC09g03400D, BnaA03g28460D, BnaA10g28450D, BnaAnng05000D, BnaC09g42490D, BnaC02g21400D, BnaC09g34640D, BnaA06g10250D, BnaCnng28450D, BnaC02g22230D, BnaC06g22690D, BnaA02g27290D, BnaC08g14190D, BnaC08g36980D, BnaC08g38060D, BnaA03g27250D, BnaA06g10400D, BnaC03g58590D, BnaC02g42100D, BnaC05g51350D, BnaA06g26720D, BnaC06g40040D, BnaC02g40…
GO:0072660	maintenance of protein location in plasma membrane	P	0.0025	7.7e-05	5	9	0.0017819	0.000115266	BnaC04g28220D, BnaA05g27280D, BnaC08g49140D, BnaA03g31960D, BnaC03g73490D
GO:0072658	maintenance of protein location in membrane	P	0.0025	7.7e-05	5	9	0.0017819	0.000115266	BnaC04g28220D, BnaA05g27280D, BnaC08g49140D, BnaA03g31960D, BnaC03g73490D
GO:0010565	regulation of cellular ketone metabolic process	P	0.0028	8.4e-05	20	198	0.00712758	0.00253586	BnaC03g21230D, BnaC09g46770D, BnaC09g03400D, BnaAnng28220D, BnaA08g17810D, BnaA02g31430D, BnaC06g23400D, BnaA07g22510D, BnaC06g40040D, BnaC02g40040D, BnaA03g17680D, BnaC03g59280D, BnaCnng31550D, BnaA09g04040D, BnaC08g41070D, BnaC06g34630D, BnaC07g28420D, BnaC06g41140D, BnaA08g18370D, BnaC03g58590D
GO:0009267	cellular response to starvation	P	0.0032	9.8e-05	86	1542	0.0306486	0.019749	BnaC03g21230D, BnaCnng60360D, BnaA01g20110D, BnaC07g08810D, BnaC09g10840D, BnaC03g55460D, BnaA03g37130D, BnaA09g08980D, BnaA02g30130D, BnaA05g32260D, BnaA08g09460D, BnaC04g46100D, BnaC08g35240D, BnaA01g06830D, BnaC09g45960D, BnaC08g02750D, BnaAnng31830D, BnaA06g35100D, BnaA04g29630D, BnaC02g21720D, BnaAnng00120D, BnaAnng09500D, BnaC02g10210D, BnaA03g17680D, BnaC02g14450D, BnaC09g29540D, BnaC02g43…
GO:0043424	protein histidine kinase binding	F	0.0032	9.9e-05	11	69	0.00392017	0.000883709	BnaAnng05950D, BnaA03g02640D, BnaC07g33120D, BnaCnng44030D, BnaA02g33910D, BnaC03g03740D, BnaA10g22680D, BnaC09g47250D, BnaA06g22900D, BnaC02g00990D, BnaA02g35710D
GO:0051592	response to calcium ion	P	0.0032	9.9e-05	11	69	0.00392017	0.000883709	BnaC06g43540D, BnaC04g34480D, BnaA03g19320D, BnaA04g05850D, BnaCnng20380D, BnaC03g23130D, BnaC03g13890D, BnaA07g25810D, BnaA04g02760D, BnaC05g29540D, BnaA03g11120D
GO:0005513	detection of calcium ion	P	0.0033	0.0001	8	35	0.00285103	0.000448258	BnaA03g19320D, BnaA04g05850D, BnaCnng20380D, BnaC03g23130D, BnaC03g13890D, BnaA04g02760D, BnaC05g29540D, BnaA03g11120D
GO:0031326	regulation of cellular biosynthetic process	P	0.0033	0.0001	425	9911	0.151461	0.126934	BnaC05g17200D, BnaC06g12880D, BnaA03g27400D, BnaA09g32960D, BnaA03g08120D, BnaA06g27060D, BnaA03g19860D, BnaC09g03400D, BnaAnng28960D, BnaA09g24500D, BnaC07g32600D, BnaC03g33170D, BnaC05g40340D, BnaA04g25900D, BnaC09g34640D, BnaC08g40640D, BnaA04g26230D, BnaCnng04580D, BnaC05g43850D, BnaC03g50150D, BnaAnng05950D, BnaC08g10960D, BnaA06g10400D, BnaC03g23850D, BnaC07g16940D, BnaC08g48630D, BnaCnng49…
GO:0010508	positive regulation of autophagy	P	0.0034	0.00011	6	17	0.00213828	0.000217725	BnaC03g21360D, BnaCnng66020D, BnaC04g14500D, BnaA03g17820D, BnaA04g22040D, BnaC04g06800D
GO:0031669	cellular response to nutrient levels	P	0.0036	0.00011	89	1616	0.0317177	0.0206967	BnaC03g21230D, BnaCnng60360D, BnaA01g20110D, BnaC07g08810D, BnaC09g10840D, BnaC03g55460D, BnaA03g37130D, BnaA09g08980D, BnaA02g30130D, BnaC05g46580D, BnaA05g32260D, BnaA08g09460D, BnaC04g46100D, BnaC08g35240D, BnaA01g06830D, BnaC09g45960D, BnaC08g02750D, BnaAnng31830D, BnaA06g35100D, BnaA04g29630D, BnaC02g21720D, BnaAnng00120D, BnaAnng09500D, BnaC02g10210D, BnaA03g17680D, BnaC02g14450D, BnaC09g29…
GO:0071705	nitrogen compound transport	P	0.0037	0.00012	172	3563	0.0612972	0.0456327	BnaA02g12360D, BnaC08g41620D, BnaCnng28600D, BnaCnng34530D, BnaA03g43670D, BnaC09g10840D, BnaAnng11580D, BnaC03g55460D, BnaA02g30130D, BnaCnng04580D, BnaA08g31640D, BnaA01g04930D, BnaC04g46100D, BnaA07g19210D, BnaA04g22280D, BnaC09g45960D, BnaA02g14850D, BnaC03g58590D, BnaA03g27520D, BnaC04g28220D, BnaAnng31830D, BnaA09g48570D, BnaA04g29630D, BnaA01g01730D, BnaCnng20160D, BnaA09g51590D, BnaC06g06…
GO:0015893	drug transport	P	0.0037	0.00012	28	342	0.00997862	0.00438012	BnaA03g57880D, BnaCnng60360D, BnaC08g49140D, BnaC04g40750D, BnaA03g58040D, BnaA04g17140D, BnaA06g10230D, BnaA08g06670D, BnaC05g25060D, BnaA08g31640D, BnaCnng47370D, BnaA07g19210D, BnaC04g00490D, BnaC08g39000D, BnaA05g32820D, BnaAnng38720D, BnaCnng45550D, BnaC04g10860D, BnaC08g16540D, BnaC03g44480D, BnaAnng41200D, BnaA06g19930D, BnaA08g31540D, BnaC07g47900D, BnaC05g11890D, BnaCnng47680D, BnaC05g37…
GO:0051641	cellular localization	P	0.0037	0.00012	310	6987	0.110478	0.0894851	BnaAnng23990D, BnaA03g29930D, BnaA06g18840D, BnaC09g03400D, BnaC08g35770D, BnaA10g28450D, BnaC03g23130D, BnaA09g45170D, BnaA01g28840D, BnaAnng22550D, BnaA04g25900D, BnaC09g34640D, BnaC05g43850D, BnaCnng28450D, BnaC06g22690D, BnaA02g27290D, BnaC08g36980D, BnaA03g27250D, BnaC08g28520D, BnaC03g58590D, BnaA03g27520D, BnaA09g48570D, BnaC02g00160D, BnaAnng21570D, BnaC02g32260D, BnaC04g45010D, BnaC02g42…
GO:0016310	phosphorylation	P	0.0038	0.00012	334	7598	0.119031	0.0973105	BnaAnng23990D, BnaA01g12590D, BnaC08g41620D, BnaC09g03400D, BnaC09g33200D, BnaC08g38820D, BnaA03g28460D, BnaA08g02130D, BnaA10g28450D, BnaAnng05000D, BnaA03g09820D, BnaA04g26230D, BnaC05g43850D, BnaA09g49200D, BnaCnng28450D, BnaC09g28710D, BnaC02g22230D, BnaA02g27290D, BnaCnng25820D, BnaC04g46100D, BnaC08g36980D, BnaA03g27250D, BnaA06g38950D, BnaC08g28520D, BnaC03g58590D, BnaC09g50140D, BnaC02g32…
GO:0097659	nucleic acid-templated transcription	P	0.0038	0.00012	413	9623	0.147185	0.123245	BnaC05g17200D, BnaC06g12880D, BnaA03g27400D, BnaA09g32960D, BnaA03g08120D, BnaA06g27060D, BnaA03g19860D, BnaAnng28960D, BnaC07g32600D, BnaC05g40340D, BnaA04g25900D, BnaC09g34640D, BnaC08g40640D, BnaA04g26230D, BnaCnng04580D, BnaC03g50150D, BnaAnng05950D, BnaC08g10960D, BnaA06g10400D, BnaC03g23850D, BnaC07g16940D, BnaC08g48630D, BnaCnng49280D, BnaAnng07270D, BnaC01g21940D, BnaA05g28580D, BnaC06g40…
GO:0019219	regulation of nucleobase-containing compound metabolic process	P	0.004	0.00013	403	9370	0.143621	0.120005	BnaC05g17200D, BnaC06g12880D, BnaA03g27400D, BnaA09g32960D, BnaA03g08120D, BnaA06g27060D, BnaA03g19860D, BnaAnng28960D, BnaC07g32600D, BnaC05g40340D, BnaA04g25900D, BnaC09g34640D, BnaC08g40640D, BnaA04g26230D, BnaCnng04580D, BnaC03g50150D, BnaAnng05950D, BnaC08g10960D, BnaA06g10400D, BnaC03g23850D, BnaC07g16940D, BnaC08g48630D, BnaCnng49280D, BnaAnng07270D, BnaC01g21940D, BnaA05g28580D, BnaC06g40…
GO:0009812	flavonoid metabolic process	P	0.0042	0.00013	69	1181	0.0245902	0.0151255	BnaC09g11650D, BnaA08g11380D, BnaA05g23050D, BnaC08g12000D, BnaC08g18280D, BnaAnng22550D, BnaCnng47330D, BnaC08g38060D, BnaA04g05470D, BnaA09g36820D, BnaC08g28520D, BnaA06g27000D, BnaUnng03540D, BnaC04g28220D, BnaA03g16830D, BnaA06g35100D, BnaC08g49480D, BnaC02g32260D, BnaA03g20490D, BnaC06g30820D, BnaC07g29940D, BnaC02g30500D, BnaA06g12890D, BnaA06g36580D, BnaA03g31960D, BnaA04g07430D, BnaA01g01…
GO:0042493	response to drug	P	0.0043	0.00014	28	346	0.00997862	0.00443135	BnaA03g57880D, BnaCnng60360D, BnaC08g49140D, BnaC04g40750D, BnaA03g58040D, BnaA04g17140D, BnaA06g10230D, BnaA08g06670D, BnaC05g25060D, BnaA08g31640D, BnaCnng47370D, BnaA07g19210D, BnaC04g00490D, BnaC08g39000D, BnaA05g32820D, BnaAnng38720D, BnaCnng45550D, BnaC04g10860D, BnaC08g16540D, BnaC03g44480D, BnaAnng41200D, BnaA06g19930D, BnaA08g31540D, BnaC07g47900D, BnaC05g11890D, BnaCnng47680D, BnaC05g37…
GO:1990778	protein localization to cell periphery	P	0.0044	0.00014	8	37	0.00285103	0.000473873	BnaC04g28220D, BnaA05g27280D, BnaC08g49140D, BnaA03g31960D, BnaA04g05470D, BnaC03g73490D, BnaC03g18010D, BnaC03g18020D
GO:0072659	protein localization to plasma membrane	P	0.0044	0.00014	8	37	0.00285103	0.000473873	BnaC04g28220D, BnaA05g27280D, BnaC08g49140D, BnaA03g31960D, BnaA04g05470D, BnaC03g73490D, BnaC03g18010D, BnaC03g18020D
GO:2000280	regulation of root development	P	0.0046	0.00015	17	159	0.00605845	0.00203637	BnaC08g25470D, BnaA02g01550D, BnaC03g21230D, BnaA08g11230D, BnaC05g21480D, BnaA05g23050D, BnaC01g06510D, BnaC03g66160D, BnaC01g44060D, BnaA03g17680D, BnaA01g02730D, BnaC02g20430D, BnaC03g58080D, BnaA05g16940D, BnaA09g27780D, BnaA08g18790D, BnaC06g24400D
GO:0032774	RNA biosynthetic process	P	0.0048	0.00016	413	9655	0.147185	0.123655	BnaC05g17200D, BnaC06g12880D, BnaA03g27400D, BnaA09g32960D, BnaA03g08120D, BnaA06g27060D, BnaA03g19860D, BnaAnng28960D, BnaC07g32600D, BnaC05g40340D, BnaA04g25900D, BnaC09g34640D, BnaC08g40640D, BnaA04g26230D, BnaCnng04580D, BnaC03g50150D, BnaAnng05950D, BnaC08g10960D, BnaA06g10400D, BnaC03g23850D, BnaC07g16940D, BnaC08g48630D, BnaCnng49280D, BnaAnng07270D, BnaC01g21940D, BnaA05g28580D, BnaC06g40…
GO:0042594	response to starvation	P	0.0048	0.00016	86	1566	0.0306486	0.0200564	BnaC03g21230D, BnaCnng60360D, BnaA01g20110D, BnaC07g08810D, BnaC09g10840D, BnaC03g55460D, BnaA03g37130D, BnaA09g08980D, BnaA02g30130D, BnaA05g32260D, BnaA08g09460D, BnaC04g46100D, BnaC08g35240D, BnaA01g06830D, BnaC09g45960D, BnaC08g02750D, BnaAnng31830D, BnaA06g35100D, BnaA04g29630D, BnaC02g21720D, BnaAnng00120D, BnaAnng09500D, BnaC02g10210D, BnaA03g17680D, BnaC02g14450D, BnaC09g29540D, BnaC02g43…
GO:0080164	regulation of nitric oxide metabolic process	P	0.0049	0.00016	3	1	0.00106914	1.28074e-05	BnaC06g43540D, BnaC04g34480D, BnaA07g25810D
GO:0005351	sugar:proton symporter activity	F	0.005	0.00017	28	350	0.00997862	0.00448258	BnaCnng78100D, BnaCnng34530D, BnaC02g42230D, BnaA03g52810D, BnaC06g37180D, BnaA09g47680D, BnaA03g28200D, BnaC06g37190D, BnaA10g30480D, BnaC06g39820D, BnaC03g33320D, BnaA04g22280D, BnaA08g26710D, BnaC09g49280D, BnaC02g26360D, BnaCnng07770D, BnaA04g04020D, BnaA03g39490D, BnaA03g04470D, BnaC06g37200D, BnaA02g18110D, BnaC07g13570D, BnaC06g37230D, BnaA03g01930D, BnaA05g31350D, BnaC05g45870D, BnaC03g02…
GO:0005402	cation:sugar symporter activity	F	0.005	0.00017	28	350	0.00997862	0.00448258	BnaCnng78100D, BnaCnng34530D, BnaC02g42230D, BnaA03g52810D, BnaC06g37180D, BnaA09g47680D, BnaA03g28200D, BnaC06g37190D, BnaA10g30480D, BnaC06g39820D, BnaC03g33320D, BnaA04g22280D, BnaA08g26710D, BnaC09g49280D, BnaC02g26360D, BnaCnng07770D, BnaA04g04020D, BnaA03g39490D, BnaA03g04470D, BnaC06g37200D, BnaA02g18110D, BnaC07g13570D, BnaC06g37230D, BnaA03g01930D, BnaA05g31350D, BnaC05g45870D, BnaC03g02…
GO:0009991	response to extracellular stimulus	P	0.005	0.00017	102	1933	0.0363507	0.0247567	BnaC09g10840D, BnaC03g55460D, BnaA03g37130D, BnaA02g30130D, BnaC04g46100D, BnaC08g35240D, BnaC09g45960D, BnaC02g04270D, BnaAnng31830D, BnaA06g35100D, BnaA04g29630D, BnaC08g46320D, BnaC08g01410D, BnaA03g17680D, BnaC02g14450D, BnaC09g29540D, BnaC02g43920D, BnaC07g13550D, BnaA09g20430D, BnaC07g22160D, BnaC04g35510D, BnaC05g50000D, BnaC07g48940D, BnaC08g49140D, BnaA06g00050D, BnaA02g26660D, BnaA03g59…
GO:1901362	organic cyclic compound biosynthetic process	P	0.0051	0.00017	607	14736	0.216322	0.18873	BnaC05g17200D, BnaA06g18840D, BnaC08g41620D, BnaC06g12880D, BnaA03g27400D, BnaA09g32960D, BnaA03g08120D, BnaA06g27060D, BnaA03g19860D, BnaC09g03400D, BnaAnng28960D, BnaC07g32600D, BnaC02g21400D, BnaC05g40340D, BnaA04g25900D, BnaC09g34640D, BnaC08g40640D, BnaA04g26230D, BnaCnng04580D, BnaC03g50150D, BnaAnng05950D, BnaC08g10960D, BnaCnng28450D, BnaA02g27290D, BnaA06g10400D, BnaA06g40660D, BnaC03g58…
GO:0010117	photoprotection	P	0.0051	0.00017	7	28	0.00249465	0.000358607	BnaA05g20490D, BnaC07g16940D, BnaC05g21480D, BnaA01g26030D, BnaC03g58080D, BnaA09g27780D, BnaA08g18790D
GO:0071944	cell periphery	C	0.0061	0.00021	668	16383	0.238061	0.209823	BnaA03g57660D, BnaC08g41620D, BnaC07g50260D, BnaA06g27060D, BnaC02g06950D, BnaA02g20700D, BnaC01g44070D, BnaA04g26460D, BnaC08g39420D, BnaA04g15600D, BnaC04g46100D, BnaA03g27520D, BnaC04g25500D, BnaC02g00160D, BnaA04g29630D, BnaC02g32260D, BnaC06g06610D, BnaC07g25170D, BnaC08g48860D, BnaC08g31200D, BnaC02g42100D, BnaC02g07060D, BnaCnng66030D, BnaC03g18140D, BnaA02g35710D, BnaAnng20740D, BnaC06g43…
GO:0006351	transcription, DNA-templated	P	0.0062	0.00021	410	9612	0.146115	0.123105	BnaC05g17200D, BnaC06g12880D, BnaA03g27400D, BnaA09g32960D, BnaA03g08120D, BnaA06g27060D, BnaA03g19860D, BnaAnng28960D, BnaC07g32600D, BnaC05g40340D, BnaA04g25900D, BnaC09g34640D, BnaC08g40640D, BnaA04g26230D, BnaCnng04580D, BnaC03g50150D, BnaAnng05950D, BnaC08g10960D, BnaA06g10400D, BnaC03g23850D, BnaC07g16940D, BnaC08g48630D, BnaCnng49280D, BnaAnng07270D, BnaC01g21940D, BnaA05g28580D, BnaC06g40…
GO:0042623	ATPase activity, coupled	F	0.0062	0.00021	80	1445	0.0285103	0.0185067	BnaA01g25310D, BnaCnng60360D, BnaC03g15300D, BnaA03g08120D, BnaA10g14690D, BnaC03g31360D, BnaC06g37180D, BnaA04g17140D, BnaC03g10310D, BnaA06g10230D, BnaC01g38000D, BnaA10g18890D, BnaC03g73610D, BnaA03g32640D, BnaA07g19210D, BnaC04g00490D, BnaC01g37960D, BnaC01g19980D, BnaA08g01230D, BnaA04g03860D, BnaA08g18750D, BnaC08g36690D, BnaC03g78180D, BnaA04g05540D, BnaC06g10670D, BnaC05g47920D, BnaC04g51…
GO:0009963	positive regulation of flavonoid biosynthetic process	P	0.0064	0.00022	38	549	0.0135424	0.00703125	BnaA01g01220D, BnaC08g20260D, BnaA05g27280D, BnaC08g49140D, BnaCnng77100D, BnaC08g18280D, BnaAnng07100D, BnaAnng22550D, BnaC08g07580D, BnaC05g50160D, BnaC09g23580D, BnaC04g00040D, BnaA04g05470D, BnaC03g73490D, BnaC09g50760D, BnaC06g28110D, BnaA09g36820D, BnaC08g28520D, BnaA01g03580D, BnaCnng63440D, BnaA05g36600D, BnaUnng03540D, BnaC04g28220D, BnaC04g27800D, BnaA09g11240D, BnaC08g49480D, BnaC06g37…
GO:0005887	integral component of plasma membrane	C	0.0068	0.00023	20	215	0.00712758	0.00275359	BnaC09g49280D, BnaA06g35100D, BnaCnng07770D, BnaA09g18500D, BnaC08g39060D, BnaA03g04230D, BnaC02g21720D, BnaC09g31990D, BnaA03g34260D, BnaA03g52810D, BnaCnng17820D, BnaA03g02020D, BnaA10g30480D, BnaC03g03010D, BnaC07g13570D, BnaA03g01930D, BnaA10g09560D, BnaC03g02450D, BnaC05g50000D, BnaAnng30500D
GO:0009962	regulation of flavonoid biosynthetic process	P	0.0069	0.00024	42	632	0.0149679	0.00809426	BnaA01g01220D, BnaC08g20260D, BnaA05g27280D, BnaC08g49140D, BnaCnng77100D, BnaC08g18280D, BnaAnng07100D, BnaAnng22550D, BnaC08g07580D, BnaC05g50160D, BnaC09g23580D, BnaC04g00040D, BnaA04g05470D, BnaC03g73490D, BnaC09g50760D, BnaC06g28110D, BnaA09g36820D, BnaC08g28520D, BnaA01g03580D, BnaCnng63440D, BnaA05g36600D, BnaUnng03540D, BnaC04g28220D, BnaC04g27800D, BnaA06g35100D, BnaA09g11240D, BnaC08g49…
GO:0005215	transporter activity	F	0.0069	0.00024	222	4850	0.0791162	0.0621158	BnaC03g00090D, BnaC08g35770D, BnaCnng34530D, BnaC03g31360D, BnaA04g17140D, BnaC03g55460D, BnaA02g30130D, BnaC03g33320D, BnaA09g51590D, BnaA03g04470D, BnaA01g30060D, BnaC08g40880D, BnaA06g40390D, BnaA06g27700D, BnaC06g37230D, BnaC02g20430D, BnaCnng31250D, BnaA02g16040D, BnaCnng05320D, BnaA06g35450D, BnaC06g21240D, BnaC04g40750D, BnaA03g36090D, BnaC06g37190D, BnaC09g04620D, BnaA01g24360D, BnaC03g00…
GO:0000325	plant-type vacuole	C	0.0072	0.00025	39	573	0.0138988	0.00733863	BnaA06g01060D, BnaC05g17610D, BnaA09g34850D, BnaC05g17600D, BnaA03g28200D, BnaC09g10840D, BnaCnng71820D, BnaA03g11120D, BnaC06g39820D, BnaC03g73620D, BnaC01g38000D, BnaC01g38010D, BnaC03g73610D, BnaA03g32690D, BnaA03g32640D, BnaC08g41390D, BnaC03g33320D, BnaA03g32650D, BnaC01g37970D, BnaC03g13890D, BnaC01g37960D, BnaAnng08210D, BnaA09g48570D, BnaA08g26710D, BnaC05g17110D, BnaC07g18830D, BnaA03g04…
GO:2000112	regulation of cellular macromolecule biosynthetic process	P	0.0073	0.00025	412	9689	0.146828	0.124091	BnaC05g17200D, BnaC06g12880D, BnaA03g27400D, BnaA09g32960D, BnaA03g08120D, BnaA06g27060D, BnaA03g19860D, BnaAnng28960D, BnaA09g24500D, BnaC07g32600D, BnaC03g33170D, BnaC05g40340D, BnaA04g25900D, BnaC09g34640D, BnaC08g40640D, BnaA04g26230D, BnaCnng04580D, BnaC05g43850D, BnaC03g50150D, BnaAnng05950D, BnaC08g10960D, BnaA06g10400D, BnaC03g23850D, BnaC07g16940D, BnaC08g48630D, BnaCnng49280D, BnaAnng07…
GO:0050502	cis-zeatin O-beta-D-glucosyltransferase activity	F	0.0079	0.00027	6	21	0.00213828	0.000268955	BnaA03g16830D, BnaA05g07590D, BnaC04g08450D, BnaC04g08440D, BnaCnng24710D, BnaA04g21090D
GO:0050403	trans-zeatin O-beta-D-glucosyltransferase activity	F	0.0079	0.00027	6	21	0.00213828	0.000268955	BnaA03g16830D, BnaA05g07590D, BnaC04g08450D, BnaC04g08440D, BnaCnng24710D, BnaA04g21090D
GO:0010556	regulation of macromolecule biosynthetic process	P	0.0081	0.00028	412	9704	0.146828	0.124283	BnaC05g17200D, BnaC06g12880D, BnaA03g27400D, BnaA09g32960D, BnaA03g08120D, BnaA06g27060D, BnaA03g19860D, BnaAnng28960D, BnaA09g24500D, BnaC07g32600D, BnaC03g33170D, BnaC05g40340D, BnaA04g25900D, BnaC09g34640D, BnaC08g40640D, BnaA04g26230D, BnaCnng04580D, BnaC05g43850D, BnaC03g50150D, BnaAnng05950D, BnaC08g10960D, BnaA06g10400D, BnaC03g23850D, BnaC07g16940D, BnaC08g48630D, BnaCnng49280D, BnaAnng07…
GO:0031667	response to nutrient levels	P	0.0082	0.00029	90	1688	0.0320741	0.0216189	BnaC03g21230D, BnaCnng60360D, BnaA01g20110D, BnaC07g08810D, BnaC09g10840D, BnaC03g55460D, BnaA03g37130D, BnaA09g08980D, BnaA02g30130D, BnaC05g46580D, BnaA05g32260D, BnaA08g09460D, BnaC04g46100D, BnaC08g35240D, BnaA01g06830D, BnaC09g45960D, BnaC08g02750D, BnaAnng31830D, BnaA06g35100D, BnaA04g29630D, BnaC02g21720D, BnaAnng00120D, BnaAnng09500D, BnaC02g10210D, BnaA03g17680D, BnaC02g14450D, BnaC09g29…
GO:0070588	calcium ion transmembrane transport	P	0.0082	0.00029	12	93	0.00427655	0.00119109	BnaA01g25310D, BnaA01g24360D, BnaA08g18750D, BnaC03g15300D, BnaC01g32200D, BnaC01g31340D, BnaA05g16820D, BnaC05g29600D, BnaC07g42210D, BnaA03g36090D, BnaC03g58140D, BnaA01g29870D
GO:0043495	protein anchor	F	0.0082	0.00029	5	13	0.0017819	0.000166496	BnaC04g28220D, BnaA05g27280D, BnaC08g49140D, BnaA03g31960D, BnaC03g73490D
GO:0071497	cellular response to freezing	P	0.0082	0.00029	5	13	0.0017819	0.000166496	BnaC05g17200D, BnaAnng28960D, BnaC06g38250D, BnaC06g00880D, BnaA10g27820D
GO:0046217	indole phytoalexin metabolic process	P	0.0082	0.00029	10	66	0.00356379	0.000845287	BnaC03g21360D, BnaCnng66020D, BnaC04g14500D, BnaC02g22230D, BnaA03g17820D, BnaA04g22040D, BnaA02g35860D, BnaA06g18440D, BnaA07g22640D, BnaC04g06800D
GO:0009403	toxin biosynthetic process	P	0.0082	0.00029	10	66	0.00356379	0.000845287	BnaC03g21360D, BnaCnng66020D, BnaC04g14500D, BnaC02g22230D, BnaA03g17820D, BnaA04g22040D, BnaA02g35860D, BnaA06g18440D, BnaA07g22640D, BnaC04g06800D
GO:0009700	indole phytoalexin biosynthetic process	P	0.0082	0.00029	10	66	0.00356379	0.000845287	BnaC03g21360D, BnaCnng66020D, BnaC04g14500D, BnaC02g22230D, BnaA03g17820D, BnaA04g22040D, BnaA02g35860D, BnaA06g18440D, BnaA07g22640D, BnaC04g06800D
GO:0052314	phytoalexin metabolic process	P	0.0082	0.00029	10	66	0.00356379	0.000845287	BnaC03g21360D, BnaCnng66020D, BnaC04g14500D, BnaC02g22230D, BnaA03g17820D, BnaA04g22040D, BnaA02g35860D, BnaA06g18440D, BnaA07g22640D, BnaC04g06800D
GO:0052315	phytoalexin biosynthetic process	P	0.0082	0.00029	10	66	0.00356379	0.000845287	BnaC03g21360D, BnaCnng66020D, BnaC04g14500D, BnaC02g22230D, BnaA03g17820D, BnaA04g22040D, BnaA02g35860D, BnaA06g18440D, BnaA07g22640D, BnaC04g06800D
GO:2000022	regulation of jasmonic acid mediated signaling pathway	P	0.0082	0.00029	7	31	0.00249465	0.000397029	BnaC02g16640D, BnaC03g71460D, BnaA01g21090D, BnaC08g48630D, BnaA03g04250D, BnaA03g40690D, BnaC07g16030D
GO:0006811	ion transport	P	0.0082	0.0003	270	6074	0.0962224	0.077792	BnaC03g00090D, BnaC08g41620D, BnaCnng28600D, BnaCnng34530D, BnaA10g28450D, BnaC03g31360D, BnaA01g28840D, BnaC03g55460D, BnaC09g34640D, BnaA02g30130D, BnaCnng04580D, BnaC09g28710D, BnaC04g46100D, BnaA02g14850D, BnaC03g58590D, BnaA03g27520D, BnaA09g48570D, BnaA04g29630D, BnaC02g32260D, BnaA01g01730D, BnaC06g06610D, BnaA03g04470D, BnaC02g42100D, BnaA09g36190D, BnaA09g35510D, BnaC08g14600D, BnaC02g14…
GO:0015085	calcium ion transmembrane transporter activity	F	0.0085	0.00031	16	154	0.00570207	0.00197234	BnaA01g25310D, BnaA02g03730D, BnaA06g01060D, BnaA08g18750D, BnaC03g15300D, BnaC01g32200D, BnaA05g16820D, BnaC05g29600D, BnaC07g42210D, BnaA03g36090D, BnaCnng10410D, BnaA01g24360D, BnaC01g31340D, BnaC02g07510D, BnaC03g58140D, BnaA01g29870D
GO:0043167	ion binding	F	0.009	0.00033	770	19184	0.274412	0.245697	BnaC08g41620D, BnaA03g08120D, BnaA02g23680D, BnaA06g33520D, BnaA08g02130D, BnaA10g17550D, BnaC06g24380D, BnaA02g09860D, BnaCnng25820D, BnaA07g34770D, BnaC02g00160D, BnaC07g16940D, BnaC02g32260D, BnaA01g01730D, BnaCnng57040D, BnaC07g25170D, BnaA05g28580D, BnaA01g15980D, BnaA05g28120D, BnaA06g26720D, BnaC03g18140D, BnaCnng61210D, BnaC06g43540D, BnaA02g12810D, BnaA08g27320D, BnaC04g00770D, BnaC08g36…
GO:0033843	xyloglucan 6-xylosyltransferase activity	F	0.0093	0.00034	6	22	0.00213828	0.000281762	BnaA09g40080D, BnaA09g40090D, BnaA09g40070D, BnaC08g32430D, BnaC04g21240D, BnaA04g27220D
GO:0015291	secondary active transmembrane transporter activity	F	0.0093	0.00034	66	1157	0.023521	0.0148181	BnaC03g00090D, BnaA06g01060D, BnaCnng34530D, BnaC06g37180D, BnaA09g47680D, BnaC03g55460D, BnaA10g30480D, BnaC06g39820D, BnaC03g33320D, BnaA08g31640D, BnaCnng47370D, BnaC02g07510D, BnaA04g22280D, BnaC08g24720D, BnaC08g39000D, BnaAnng31830D, BnaC09g49280D, BnaA01g19990D, BnaA04g04020D, BnaA03g04470D, BnaC04g10860D, BnaC03g44480D, BnaC07g47900D, BnaA09g09160D, BnaC07g13570D, BnaA06g27700D, BnaC06g37…
GO:0008194	UDP-glycosyltransferase activity	F	0.0093	0.00034	59	1004	0.0210264	0.0128586	BnaA08g11380D, BnaA05g28060D, BnaC08g36500D, BnaA09g40090D, BnaA08g25540D, BnaCnng47330D, BnaA09g40070D, BnaC04g08450D, BnaA03g36440D, BnaA05g16350D, BnaC04g11500D, BnaA07g03360D, BnaA03g16830D, BnaC08g46320D, BnaC01g31820D, BnaC08g01410D, BnaA04g26930D, BnaA08g22100D, BnaC03g35120D, BnaC08g32430D, BnaC05g48920D, BnaA03g29890D, BnaA10g27560D, BnaC03g26760D, BnaA01g03010D, BnaCnng63310D, BnaC04g00…
GO:0015802	basic amino acid transport	P	0.0094	0.00035	17	172	0.00605845	0.00220287	BnaC04g28220D, BnaA09g48570D, BnaC07g36580D, BnaA05g27280D, BnaC08g49140D, BnaC02g42100D, BnaA02g35410D, BnaC08g42830D, BnaCnng06580D, BnaA03g58530D, BnaA03g31960D, BnaA04g05470D, BnaC03g73490D, BnaA06g25880D, BnaA01g29870D, BnaA08g18370D, BnaC03g58590D
GO:1901684	arsenate ion transmembrane transport	P	0.0094	0.00035	8	43	0.00285103	0.000550717	BnaC06g37200D, BnaA02g18110D, BnaCnng78100D, BnaC06g37230D, BnaA04g04020D, BnaA04g22280D, BnaC06g37180D, BnaC06g37190D
GO:0022892	substrate-specific transporter activity	F	0.0098	0.00036	178	3802	0.0634355	0.0486936	BnaA08g21830D, BnaC03g00090D, BnaCnng34530D, BnaC03g31360D, BnaA03g43670D, BnaAnng11580D, BnaC03g55460D, BnaA03g37130D, BnaA02g30130D, BnaC03g73610D, BnaC03g33320D, BnaA07g19210D, BnaC02g07510D, BnaC08g17890D, BnaA04g22280D, BnaC01g37960D, BnaC08g24720D, BnaAnng34010D, BnaAnng31830D, BnaCnng20160D, BnaA09g51590D, BnaA04g04020D, BnaA03g04470D, BnaC04g51510D, BnaA05g13980D, BnaA01g30060D, BnaC08g40…
Down-DEGs
GO ID	GO Term	GO Type	FDR	Single Test P-Value	No. of DEGs associated with GO term	No. of genes of reference genome	% of 1505 annotated down-DEGs	% of 79831 ref genes	Sequence Names
GO:0009699	phenylpropanoid biosynthetic process	P	4.8e-26	5.7e-30	71	647	0.0471761	0.00810462	BnaC06g14510D, BnaC08g17280D, BnaC09g24870D, BnaA09g30660D, BnaA08g24900D, BnaA02g02250D, BnaC07g42660D, BnaA05g11950D, BnaA09g30490D, BnaC06g13400D, BnaA08g23220D, BnaA05g07370D, BnaA03g45610D, BnaA02g14090D, BnaA09g33560D, BnaC08g24360D, BnaC07g47650D, BnaC01g37520D, BnaC04g41510D, BnaA01g12530D, BnaC06g17050D, BnaA03g14010D, BnaC04g41130D, BnaA05g16430D, BnaCnng59540D, BnaC03g74670D, BnaC03g16…
GO:0005576	extracellular region	C	8.5e-25	2e-28	309	8480	0.205316	0.106224	BnaA04g20550D, BnaA08g07330D, BnaC07g21060D, BnaA06g08770D, BnaA02g03720D, BnaA07g04850D, BnaC07g40110D, BnaA03g44610D, BnaA09g39240D, BnaA02g00670D, BnaC02g10500D, BnaC08g44140D, BnaA02g24920D, BnaA02g06090D, BnaA02g04930D, BnaC04g54790D, BnaC02g19310D, BnaAnng06170D, BnaC03g35240D, BnaCnng63470D, BnaC04g41510D, BnaA06g01420D, BnaC01g26030D, BnaC06g35810D, BnaC04g41130D, BnaC02g12920D, BnaC02g10…
GO:0009698	phenylpropanoid metabolic process	P	1.4e-24	4.9e-28	81	920	0.0538206	0.0115243	BnaC06g14510D, BnaC08g17280D, BnaC09g24870D, BnaA06g02910D, BnaA09g30660D, BnaA08g24900D, BnaA02g02250D, BnaC07g42660D, BnaA05g11950D, BnaA09g30490D, BnaC04g54790D, BnaC06g13400D, BnaA08g23220D, BnaA05g07370D, BnaA03g45610D, BnaA02g14090D, BnaA09g33560D, BnaC08g24360D, BnaC07g47650D, BnaC03g20310D, BnaC01g37520D, BnaC04g41510D, BnaA01g12530D, BnaC06g17050D, BnaA03g14010D, BnaC04g41130D, BnaAnng15…
GO:0009813	flavonoid biosynthetic process	P	2.6e-21	1.2e-24	80	1023	0.0531561	0.0128146	BnaC06g14510D, BnaA03g41940D, BnaA09g34840D, BnaC09g24870D, BnaAnng02100D, BnaC09g50050D, BnaA03g60670D, BnaC02g07110D, BnaC01g23130D, BnaA08g24900D, BnaC08g27940D, BnaC02g38800D, BnaC07g42660D, BnaA03g04590D, BnaA05g11950D, BnaA05g07370D, BnaA03g45610D, BnaA09g33560D, BnaC08g24360D, BnaA01g12530D, BnaC08g26010D, BnaA03g14010D, BnaC04g41130D, BnaC02g28770D, BnaA07g08290D, BnaA05g16430D, BnaC01g29…
GO:0009812	flavonoid metabolic process	P	5.3e-21	3.1e-24	85	1165	0.0564784	0.0145933	BnaC06g14510D, BnaA03g41940D, BnaA09g34840D, BnaC07g40170D, BnaC09g24870D, BnaAnng02100D, BnaC09g50050D, BnaA03g60670D, BnaC02g07110D, BnaA01g15430D, BnaC01g23130D, BnaA08g24900D, BnaC08g27940D, BnaC02g38800D, BnaC07g42660D, BnaA03g04590D, BnaA05g11950D, BnaA05g07370D, BnaA03g45610D, BnaA09g33560D, BnaC08g24360D, BnaA01g12530D, BnaC08g26010D, BnaA03g14010D, BnaC04g41130D, BnaC02g28770D, BnaA07g08…
GO:0044550	secondary metabolite biosynthetic process	P	2.5e-20	1.7e-23	98	1549	0.0651163	0.0194035	BnaC08g17280D, BnaC09g24870D, BnaA01g10480D, BnaA09g30660D, BnaA02g02250D, BnaA05g11950D, BnaC06g13400D, BnaA08g23220D, BnaA05g07370D, BnaA02g14090D, BnaC09g23550D, BnaA09g33560D, BnaC07g47650D, BnaC04g41510D, BnaC06g17050D, BnaA03g14010D, BnaC04g41130D, BnaA05g16430D, BnaCnng59540D, BnaC03g74670D, BnaA07g15220D, BnaC08g27200D, BnaA09g22810D, BnaC09g42830D, BnaC09g13360D, BnaC04g20200D, BnaA09g46…
GO:0019748	secondary metabolic process	P	4e-14	3.3e-17	132	3075	0.0877076	0.0385189	BnaC08g17280D, BnaC09g24870D, BnaA01g10480D, BnaA09g30660D, BnaC08g29460D, BnaA02g02250D, BnaA05g11950D, BnaC04g54790D, BnaC06g13400D, BnaA08g23220D, BnaA05g07370D, BnaA02g14090D, BnaC09g23550D, BnaA09g33560D, BnaA03g10250D, BnaC07g47650D, BnaC03g20310D, BnaC04g41510D, BnaC03g11900D, BnaC06g17050D, BnaA03g14010D, BnaC04g41130D, BnaA05g16430D, BnaCnng59540D, BnaC03g74670D, BnaA07g15220D, BnaC08g27…
GO:0009718	anthocyanin-containing compound biosynthetic process	P	1.6e-12	1.5e-15	30	224	0.0199336	0.00280593	BnaA09g34840D, BnaC09g24870D, BnaA10g25120D, BnaC09g50050D, BnaC02g07110D, BnaC02g38800D, BnaA02g26660D, BnaC07g45760D, BnaA03g45610D, BnaA10g07160D, BnaA01g12530D, BnaC08g26010D, BnaC02g28770D, BnaC08g22640D, BnaA10g17440D, BnaA09g56350D, BnaC09g40740D, BnaA03g41250D, BnaA09g22810D, BnaC02g07090D, BnaC07g37670D, BnaA02g30470D, BnaA09g31780D, BnaC09g47980D, BnaC01g14310D, BnaC06g26980D, BnaC09g30…
GO:0009803	cinnamic acid metabolic process	P	3.4e-12	3.6e-15	12	12	0.00797342	0.000150318	BnaC06g14510D, BnaA05g07370D, BnaA09g33560D, BnaC08g24360D, BnaC05g17910D, BnaC03g74670D, BnaC04g08190D, BnaC08g06060D, BnaA07g16060D, BnaA06g22710D, BnaA09g30490D, BnaC05g42780D
GO:0009805	coumarin biosynthetic process	P	3.4e-11	4e-14	31	276	0.020598	0.0034573	BnaC06g14510D, BnaA04g17570D, BnaA09g30660D, BnaA08g24900D, BnaC04g14330D, BnaA05g11950D, BnaA05g07370D, BnaA09g33560D, BnaC08g24360D, BnaC07g47650D, BnaC04g41510D, BnaA02g36200D, BnaA03g14010D, BnaC04g41130D, BnaA05g16430D, BnaCnng59540D, BnaC03g16960D, BnaC08g27200D, BnaA03g53500D, BnaAnng38380D, BnaA05g15310D, BnaA08g20870D, BnaA07g16800D, BnaC05g17710D, BnaC02g13760D, BnaA01g18180D, BnaA02g20…
GO:0009804	coumarin metabolic process	P	5.6e-11	7.3e-14	31	283	0.020598	0.00354499	BnaC06g14510D, BnaA04g17570D, BnaA09g30660D, BnaA08g24900D, BnaC04g14330D, BnaA05g11950D, BnaA05g07370D, BnaA09g33560D, BnaC08g24360D, BnaC07g47650D, BnaC04g41510D, BnaA02g36200D, BnaA03g14010D, BnaC04g41130D, BnaA05g16430D, BnaCnng59540D, BnaC03g16960D, BnaC08g27200D, BnaA03g53500D, BnaAnng38380D, BnaA05g15310D, BnaA08g20870D, BnaA07g16800D, BnaC05g17710D, BnaC02g13760D, BnaA01g18180D, BnaA02g20…
GO:0009800	cinnamic acid biosynthetic process	P	2.7e-10	3.8e-13	10	9	0.00664452	0.000112738	BnaC06g14510D, BnaA05g07370D, BnaA09g33560D, BnaC08g24360D, BnaC05g17910D, BnaC04g08190D, BnaC08g06060D, BnaA07g16060D, BnaA09g30490D, BnaC05g42780D
GO:0010224	response to UV-B	P	3.2e-10	5.2e-13	39	487	0.0259136	0.00610039	BnaA03g41940D, BnaA09g34840D, BnaC09g24870D, BnaA10g25120D, BnaA03g50190D, BnaC09g50050D, BnaC02g07110D, BnaC08g27940D, BnaC02g38800D, BnaC07g42660D, BnaC07g45760D, BnaA05g07370D, BnaA10g07160D, BnaC07g47650D, BnaC08g26020D, BnaC08g26010D, BnaA03g01680D, BnaC02g28770D, BnaC04g56240D, BnaC08g22640D, BnaC04g15490D, BnaA04g13980D, BnaA10g17440D, BnaA09g56350D, BnaC09g40740D, BnaA03g41250D, BnaA09g22…
GO:0010023	proanthocyanidin biosynthetic process	P	3.2e-10	5.3e-13	11	15	0.00730897	0.000187897	BnaC07g37670D, BnaC08g17280D, BnaC01g14310D, BnaA08g23220D, BnaA03g45610D, BnaC09g24870D, BnaA07g18120D, BnaA01g12530D, BnaC06g17050D, BnaC02g41690D, BnaA09g22810D
GO:0009962	regulation of flavonoid biosynthetic process	P	2.9e-09	5.1e-12	43	631	0.0285714	0.0079042	BnaC06g14510D, BnaC09g24870D, BnaA03g60670D, BnaC02g07110D, BnaA04g17570D, BnaA09g43070D, BnaC01g23130D, BnaA08g24900D, BnaA04g13460D, BnaC04g14330D, BnaA05g11950D, BnaA05g07370D, BnaA09g33560D, BnaC08g24360D, BnaA03g14010D, BnaA01g36200D, BnaC04g41130D, BnaA07g08290D, BnaA05g16430D, BnaC01g29860D, BnaA10g17440D, BnaC03g16960D, BnaC09g40740D, BnaC08g27200D, BnaA09g22810D, BnaA08g24400D, BnaC02g07…
GO:0046283	anthocyanin-containing compound metabolic process	P	2.9e-09	5.6e-12	31	339	0.020598	0.00424647	BnaA09g34840D, BnaC09g24870D, BnaA10g25120D, BnaC09g50050D, BnaC02g07110D, BnaC02g38800D, BnaA02g26660D, BnaC07g45760D, BnaA03g45610D, BnaA10g07160D, BnaA01g12530D, BnaC08g26010D, BnaC02g28770D, BnaC08g22640D, BnaA10g17440D, BnaA09g56350D, BnaC09g40740D, BnaA03g41250D, BnaA09g22810D, BnaC02g07090D, BnaC07g37670D, BnaA02g30470D, BnaA09g31780D, BnaC09g47980D, BnaC01g14310D, BnaC06g26980D, BnaA09g40…
GO:0045548	phenylalanine ammonia-lyase activity	F	1.2e-06	2.3e-09	7	7	0.00465116	8.76852e-05	BnaC06g14510D, BnaA05g07370D, BnaA09g33560D, BnaC08g24360D, BnaC04g08190D, BnaA07g16060D, BnaC05g42780D
GO:0009808	lignin metabolic process	P	2.2e-06	4.7e-09	28	378	0.0186047	0.004735	BnaA03g50190D, BnaA06g02910D, BnaA04g17570D, BnaC04g51650D, BnaCnng77500D, BnaA02g02250D, BnaC07g42660D, BnaC04g14330D, BnaA05g11950D, BnaC04g54790D, BnaA05g07370D, BnaA02g14090D, BnaA03g14010D, BnaC04g41130D, BnaC04g56240D, BnaA10g25010D, BnaA04g13980D, BnaAnng35580D, BnaC03g16960D, BnaC09g42830D, BnaA07g20440D, BnaC01g22360D, BnaAnng06470D, BnaC02g13760D, BnaA01g18180D, BnaC06g39570D, BnaC04g20…
GO:0016710	trans-cinnamate 4-monooxygenase activity	F	3.6e-06	8.1e-09	6	4	0.00398671	5.01058e-05	BnaA04g17570D, BnaC03g16960D, BnaA03g14010D, BnaC04g41130D, BnaC04g14330D, BnaA05g11950D
GO:0009611	response to wounding	P	6.1e-06	1.4e-08	73	1852	0.048505	0.023199	BnaA02g33980D, BnaC06g14510D, BnaA05g30870D, BnaA03g44610D, BnaA09g30660D, BnaA08g24900D, BnaA09g43480D, BnaA05g11950D, BnaA09g30490D, BnaC04g00870D, BnaA09g44420D, BnaA05g07370D, BnaA09g21170D, BnaA03g45610D, BnaC09g23550D, BnaA09g33560D, BnaC08g24360D, BnaC06g34870D, BnaC07g47650D, BnaA07g16940D, BnaC04g41510D, BnaCnng20450D, BnaA01g12530D, BnaA09g42790D, BnaA03g14010D, BnaC04g41130D, BnaA08g14…
GO:0016872	intramolecular lyase activity	F	8.3e-06	2.1e-08	10	39	0.00664452	0.000488532	BnaA09g34840D, BnaC07g45760D, BnaA10g25120D, BnaC09g50050D, BnaA09g42760D, BnaA02g00400D, BnaC08g26020D, BnaC08g26010D, BnaA09g55750D, BnaC02g00460D
GO:0016705	oxidoreductase activity, acting on paired donors, with incorporation or reduction of molecular oxygen	F	1.7e-05	4.4e-08	60	1438	0.0398671	0.0180131	BnaA01g10480D, BnaC05g34660D, BnaA07g06490D, BnaA03g33500D, BnaA09g41580D, BnaA05g11950D, BnaC04g30880D, BnaC02g23190D, BnaA04g13470D, BnaA09g42120D, BnaA09g42100D, BnaA03g45610D, BnaC03g02920D, BnaA09g42750D, BnaC03g11900D, BnaA01g12530D, BnaA03g14010D, BnaC04g41130D, BnaC04g52640D, BnaC09g23280D, BnaA03g12080D, BnaC07g47120D, BnaA02g02150D, BnaC02g05340D, BnaA09g13940D, BnaA10g28100D, BnaAnng41…
GO:1900384	regulation of flavonol biosynthetic process	P	1.7e-05	4.5e-08	5	2	0.00332226	2.50529e-05	BnaC02g07110D, BnaA02g03440D, BnaA10g17440D, BnaC09g40740D, BnaC02g07090D
GO:0033321	homomethionine metabolic process	P	2.1e-05	6.3e-08	6	7	0.00398671	8.76852e-05	BnaC09g13360D, BnaA09g21170D, BnaC09g23540D, BnaA09g21160D, BnaC09g23550D, BnaA09g13190D
GO:0033506	glucosinolate biosynthetic process from homomethionine	P	2.1e-05	6.3e-08	6	7	0.00398671	8.76852e-05	BnaC09g13360D, BnaA09g21170D, BnaC09g23540D, BnaA09g21160D, BnaC09g23550D, BnaA09g13190D
GO:0009963	positive regulation of flavonoid biosynthetic process	P	3.3e-05	1e-07	32	555	0.0212625	0.00695219	BnaC06g14510D, BnaA04g17570D, BnaA09g43070D, BnaC01g23130D, BnaA08g24900D, BnaA04g13460D, BnaC04g14330D, BnaA05g11950D, BnaA05g07370D, BnaA09g33560D, BnaC08g24360D, BnaA03g14010D, BnaC04g41130D, BnaA07g08290D, BnaA05g16430D, BnaC01g29860D, BnaC03g16960D, BnaC08g27200D, BnaA08g24400D, BnaAnng38380D, BnaA05g15310D, BnaC02g16840D, BnaA07g16800D, BnaC02g13760D, BnaA01g18180D, BnaA02g20270D, BnaC04g08…
GO:0050589	leucocyanidin oxygenase activity	F	3.7e-05	1.2e-07	4	0	0.00265781	0	BnaC07g37670D, BnaC01g14310D, BnaA03g45610D, BnaA01g12530D
GO:0020037	heme binding	F	4.3e-05	1.4e-07	49	1107	0.0325581	0.0138668	BnaA01g10480D, BnaC05g34660D, BnaA02g03720D, BnaA07g06490D, BnaA03g33500D, BnaC08g44140D, BnaA09g41580D, BnaA05g11950D, BnaC04g30880D, BnaA04g13470D, BnaA09g42120D, BnaA09g42100D, BnaA02g14050D, BnaA03g14010D, BnaC04g41130D, BnaC04g52640D, BnaAnng15470D, BnaC09g23280D, BnaA03g12080D, BnaC07g47120D, BnaA02g02150D, BnaC02g05340D, BnaA09g41210D, BnaA06g11010D, BnaC03g16960D, BnaC09g47980D, BnaC02g33…
GO:0071514	genetic imprinting	P	4.4e-05	1.6e-07	10	50	0.00664452	0.000626323	BnaA05g20150D, BnaA09g42250D, BnaA01g18110D, BnaA02g07770D, BnaC04g09420D, BnaC05g31520D, BnaC04g09410D, BnaC04g08790D, BnaA10g29210D, BnaA03g13220D
GO:0006349	regulation of gene expression by genetic imprinting	P	4.4e-05	1.6e-07	10	50	0.00664452	0.000626323	BnaA05g20150D, BnaA09g42250D, BnaA01g18110D, BnaA02g07770D, BnaC04g09420D, BnaC05g31520D, BnaC04g09410D, BnaC04g08790D, BnaA10g29210D, BnaA03g13220D
GO:0004497	monooxygenase activity	F	4.4e-05	1.6e-07	43	911	0.0285714	0.0114116	BnaA01g10480D, BnaC05g34660D, BnaA07g06490D, BnaA04g17570D, BnaA03g33500D, BnaA09g41580D, BnaC04g14330D, BnaA05g11950D, BnaC04g30880D, BnaA04g13470D, BnaA09g42120D, BnaA09g42110D, BnaA09g42100D, BnaA07g16930D, BnaC02g33320D, BnaA09g42330D, BnaA03g14010D, BnaA03g01680D, BnaC04g41130D, BnaC04g52640D, BnaA05g18960D, BnaC09g23280D, BnaA03g12080D, BnaC07g47120D, BnaA02g02150D, BnaC03g73120D, BnaC02g05…
GO:0004869	cysteine-type endopeptidase inhibitor activity	F	0.00014	5.3e-07	10	58	0.00664452	0.000726535	BnaC09g39980D, BnaA04g20550D, BnaA04g20540D, BnaAnng17020D, BnaC08g48010D, BnaC03g19420D, BnaC04g44460D, BnaA01g17260D, BnaA09g19490D, BnaA09g19480D
GO:0009964	negative regulation of flavonoid biosynthetic process	P	0.00015	5.9e-07	4	1	0.00265781	1.25265e-05	BnaC01g29820D, BnaC04g18950D, BnaA03g60670D, BnaA01g36200D
GO:0033729	anthocyanidin reductase activity	F	0.00015	5.9e-07	4	1	0.00265781	1.25265e-05	BnaC01g29820D, BnaC04g18950D, BnaA03g60670D, BnaA01g36200D
GO:0016841	ammonia-lyase activity	F	0.0002	8.3e-07	7	22	0.00465116	0.000275582	BnaC06g14510D, BnaA05g07370D, BnaA09g33560D, BnaC08g24360D, BnaC04g08190D, BnaA07g16060D, BnaC05g42780D
GO:0045430	chalcone isomerase activity	F	0.00021	9.1e-07	6	13	0.00398671	0.000162844	BnaA09g34840D, BnaC07g45760D, BnaA10g25120D, BnaC09g50050D, BnaC08g26020D, BnaC08g26010D
GO:0042398	cellular modified amino acid biosynthetic process	P	0.00028	1.2e-06	22	333	0.0146179	0.00417131	BnaC06g14510D, BnaAnng15470D, BnaA09g50050D, BnaA02g00400D, BnaC08g27200D, BnaAnng38380D, BnaA05g37040D, BnaA05g07370D, BnaA05g15310D, BnaA09g33560D, BnaA01g37260D, BnaC08g24360D, BnaA07g16800D, BnaC02g13760D, BnaC07g47650D, BnaC03g20310D, BnaAnng01550D, BnaC04g08190D, BnaA07g16060D, BnaC06g15850D, BnaC02g02140D, BnaC02g00460D
GO:1902222	erythrose 4-phosphate/phosphoenolpyruvate family amino acid catabolic process	P	0.00029	1.4e-06	7	24	0.00465116	0.000300635	BnaC06g14510D, BnaA05g07370D, BnaA09g33560D, BnaC08g24360D, BnaC04g08190D, BnaA07g16060D, BnaC05g42780D
GO:0006559	L-phenylalanine catabolic process	P	0.00029	1.4e-06	7	24	0.00465116	0.000300635	BnaC06g14510D, BnaA05g07370D, BnaA09g33560D, BnaC08g24360D, BnaC04g08190D, BnaA07g16060D, BnaC05g42780D
GO:0046906	tetrapyrrole binding	F	0.00029	1.4e-06	50	1239	0.0332226	0.0155203	BnaA01g10480D, BnaC05g34660D, BnaA02g03720D, BnaA07g06490D, BnaA03g33500D, BnaC08g44140D, BnaA09g41580D, BnaA05g11950D, BnaC04g30880D, BnaA04g13470D, BnaA09g42120D, BnaA09g42100D, BnaA02g14050D, BnaA03g14010D, BnaC04g41130D, BnaC04g52640D, BnaAnng15470D, BnaC09g23280D, BnaA03g12080D, BnaC07g47120D, BnaA02g02150D, BnaC02g05340D, BnaA09g41210D, BnaA06g11010D, BnaC03g16960D, BnaC09g47980D, BnaC02g33…
GO:0006598	polyamine catabolic process	P	0.00029	1.5e-06	17	209	0.0112957	0.00261803	BnaC06g14510D, BnaAnng15470D, BnaC08g27200D, BnaAnng38380D, BnaA05g37040D, BnaA05g07370D, BnaA05g15310D, BnaA09g33560D, BnaA01g37260D, BnaC08g24360D, BnaA07g16800D, BnaC02g13760D, BnaC07g47650D, BnaC03g20310D, BnaC04g08190D, BnaA07g16060D, BnaC06g15850D
GO:0043086	negative regulation of catalytic activity	P	0.00029	1.5e-06	39	859	0.0259136	0.0107602	BnaA04g20550D, BnaA04g20540D, BnaC02g10500D, BnaA04g13460D, BnaA09g41990D, BnaC01g34800D, BnaA09g19490D, BnaA09g19480D, BnaAnng33480D, BnaA10g07760D, BnaA03g09630D, BnaAnng18940D, BnaC02g33520D, BnaC09g34450D, BnaC08g32510D, BnaC02g25290D, BnaA02g07390D, BnaC04g11920D, BnaAnng36790D, BnaA10g29100D, BnaA02g27220D, BnaA03g12960D, BnaA09g42570D, BnaA10g12220D, BnaC02g10460D, BnaC02g10490D, BnaC04g44…
GO:0016210	naringenin-chalcone synthase activity	F	0.00031	1.6e-06	5	7	0.00332226	8.76852e-05	BnaC03g06120D, BnaC09g43250D, BnaA10g19670D, BnaC02g05070D, BnaA03g04590D
GO:0006827	high-affinity iron ion transmembrane transport	P	0.00032	1.7e-06	4	2	0.00265781	2.50529e-05	BnaAnng38380D, BnaA07g16800D, BnaC06g15850D, BnaC08g27200D
GO:0070179	D-serine biosynthetic process	P	0.00032	1.7e-06	4	2	0.00265781	2.50529e-05	BnaA10g26070D, BnaC02g32750D, BnaA02g24710D, BnaCnng10350D
GO:0046437	D-amino acid biosynthetic process	P	0.00032	1.7e-06	4	2	0.00265781	2.50529e-05	BnaA10g26070D, BnaC02g32750D, BnaA02g24710D, BnaCnng10350D
GO:0005677	chromatin silencing complex	C	0.00049	2.7e-06	8	40	0.00531561	0.000501058	BnaA05g20150D, BnaA01g18110D, BnaA02g07770D, BnaA07g05640D, BnaC04g09420D, BnaC05g31520D, BnaC04g08790D, BnaA10g29210D
GO:0009411	response to UV	P	0.00055	3.1e-06	48	1204	0.0318937	0.0150819	BnaA03g41940D, BnaA09g34840D, BnaC09g24870D, BnaA10g25120D, BnaA03g50190D, BnaC09g50050D, BnaC02g07110D, BnaA06g02910D, BnaC08g27940D, BnaC02g38800D, BnaC07g42660D, BnaC07g45760D, BnaA05g07370D, BnaA10g07160D, BnaC07g47650D, BnaC08g26020D, BnaC08g26010D, BnaA03g01680D, BnaC02g28770D, BnaC04g56240D, BnaUnng01070D, BnaC08g22640D, BnaC04g15490D, BnaA09g55900D, BnaA04g13980D, BnaA10g17440D, BnaA09g56…
GO:0016531	copper chaperone activity	F	0.00067	3.9e-06	5	9	0.00332226	0.000112738	BnaAnng38380D, BnaC09g10980D, BnaA07g16800D, BnaC06g15850D, BnaC08g27200D
GO:0005506	iron ion binding	F	0.00082	4.8e-06	48	1225	0.0318937	0.0153449	BnaA01g10480D, BnaC05g34660D, BnaA02g08540D, BnaA09g56810D, BnaA07g06490D, BnaA04g17570D, BnaA03g33500D, BnaA09g41580D, BnaC04g14330D, BnaA05g11950D, BnaC04g30880D, BnaCnng72000D, BnaC02g23190D, BnaA04g13470D, BnaA09g42120D, BnaA09g42110D, BnaA09g42100D, BnaA07g16930D, BnaC03g02920D, BnaA01g06800D, BnaAnng12450D, BnaA03g14010D, BnaA03g01680D, BnaC04g41130D, BnaC04g52640D, BnaA05g18960D, BnaC09g23…
GO:0015145	monosaccharide transmembrane transporter activity	F	0.0009	5.4e-06	9	60	0.00598007	0.000751588	BnaA07g33390D, BnaA05g19250D, BnaC05g08610D, BnaC05g32770D, BnaA06g28180D, BnaC01g12770D, BnaC07g49600D, BnaC06g37940D, BnaA01g11330D
GO:0015749	monosaccharide transport	P	0.00098	6.1e-06	9	61	0.00598007	0.000764114	BnaA07g33390D, BnaA05g19250D, BnaC05g08610D, BnaC05g32770D, BnaA06g28180D, BnaC01g12770D, BnaC07g49600D, BnaC06g37940D, BnaA01g11330D
GO:0044092	negative regulation of molecular function	P	0.00098	6.2e-06	39	916	0.0259136	0.0114742	BnaA04g20550D, BnaA04g20540D, BnaC02g10500D, BnaA04g13460D, BnaA09g41990D, BnaC01g34800D, BnaA09g19490D, BnaA09g19480D, BnaAnng33480D, BnaA10g07760D, BnaA03g09630D, BnaAnng18940D, BnaC02g33520D, BnaC09g34450D, BnaC08g32510D, BnaC02g25290D, BnaA02g07390D, BnaC04g11920D, BnaAnng36790D, BnaA10g29100D, BnaA02g27220D, BnaA03g12960D, BnaA09g42570D, BnaA10g12220D, BnaC02g10460D, BnaC02g10490D, BnaC04g44…
GO:0080167	response to karrikin	P	0.0011	7.3e-06	34	752	0.0225914	0.0094199	BnaC06g14510D, BnaA05g27460D, BnaA09g34840D, BnaA10g25120D, BnaA03g50190D, BnaAnng28300D, BnaC09g50050D, BnaA04g17570D, BnaC08g44590D, BnaC07g42660D, BnaC04g14330D, BnaA05g11950D, BnaA09g44430D, BnaC07g45760D, BnaA05g07370D, BnaA07g37170D, BnaA09g33560D, BnaC08g24360D, BnaC08g26020D, BnaC08g26010D, BnaA03g14010D, BnaC04g41130D, BnaC04g56240D, BnaA04g29560D, BnaA04g13980D, BnaC08g01840D, BnaC08g01…
GO:0070178	D-serine metabolic process	P	0.0012	7.9e-06	4	4	0.00265781	5.01058e-05	BnaA10g26070D, BnaC02g32750D, BnaA02g24710D, BnaCnng10350D
GO:0016765	transferase activity, transferring alkyl or aryl (other than methyl) groups	F	0.0017	1.1e-05	23	415	0.0152824	0.00519848	BnaA08g27280D, BnaC06g38840D, BnaCnng59540D, BnaC02g07110D, BnaA06g05310D, BnaA01g26240D, BnaA09g30660D, BnaA10g17440D, BnaC09g40740D, BnaC05g01540D, BnaA09g45070D, BnaC05g01550D, BnaC02g07090D, BnaA09g41820D, BnaC08g00080D, BnaC01g33530D, BnaA08g20870D, BnaC05g17710D, BnaC03g20310D, BnaC05g31920D, BnaC04g41510D, BnaA02g03440D, BnaA10g01510D
GO:0016621	cinnamoyl-CoA reductase activity	F	0.002	1.4e-05	7	36	0.00465116	0.000450953	BnaC09g42830D, BnaA03g50190D, BnaA04g13980D, BnaAnng35580D, BnaA02g02250D, BnaC07g42660D, BnaC04g56240D
GO:0004364	glutathione transferase activity	F	0.002	1.4e-05	13	151	0.00863787	0.0018915	BnaA08g27280D, BnaC06g38840D, BnaC02g07110D, BnaA10g17440D, BnaC09g40740D, BnaC05g01540D, BnaA09g45070D, BnaC05g01550D, BnaC02g07090D, BnaC08g00080D, BnaC04g41510D, BnaA02g03440D, BnaA10g01510D
GO:0016620	oxidoreductase activity, acting on the aldehyde or oxo group of donors, NAD or NADP as acceptor	F	0.0025	1.7e-05	15	203	0.00996678	0.00254287	BnaA07g05850D, BnaA03g50190D, BnaA04g13980D, BnaA06g19780D, BnaAnng35580D, BnaA07g17030D, BnaA02g02250D, BnaC07g42660D, BnaC09g42830D, BnaA03g28400D, BnaA07g16940D, BnaCnng20450D, BnaA09g46260D, BnaC04g56240D, BnaA01g01360D
GO:0042406	extrinsic component of endoplasmic reticulum membrane	C	0.0029	2.1e-05	5	14	0.00332226	0.00017537	BnaA09g34840D, BnaC07g45760D, BnaC08g26020D, BnaC08g26010D, BnaC02g28770D
GO:0003849	3-deoxy-7-phosphoheptulonate synthase activity	F	0.0032	2.3e-05	4	6	0.00265781	7.51588e-05	BnaCnng59540D, BnaA08g20870D, BnaC05g17710D, BnaA09g30660D
GO:0016491	oxidoreductase activity	F	0.0035	2.5e-05	155	5847	0.10299	0.0732422	BnaC04g34260D, BnaA01g10480D, BnaA02g08540D, BnaA02g03720D, BnaCnng28830D, BnaA03g44610D, BnaC08g44140D, BnaA02g02250D, BnaA05g11950D, BnaC04g30880D, BnaC04g54790D, BnaA09g42120D, BnaA02g14090D, BnaC03g02920D, BnaC02g33320D, BnaA02g14050D, BnaCnng03410D, BnaC04g41510D, BnaC03g11900D, BnaA03g14010D, BnaC04g41130D, BnaC04g52640D, BnaA05g16430D, BnaC09g23280D, BnaC07g47120D, BnaCnng35090D, BnaA09g39…
GO:0050734	hydroxycinnamoyltransferase activity	F	0.0037	2.7e-05	5	15	0.00332226	0.000187897	BnaC06g13400D, BnaC03g74670D, BnaA01g18180D, BnaA07g15220D, BnaA06g22710D
GO:0015296	anion:cation symporter activity	F	0.0037	2.8e-05	8	57	0.00531561	0.000714008	BnaA09g44430D, BnaA09g21170D, BnaC09g23540D, BnaA09g21160D, BnaC09g23550D, BnaC04g07470D, BnaC09g43150D, BnaC04g00230D
GO:0004252	serine-type endopeptidase activity	F	0.0042	3.3e-05	19	326	0.0126246	0.00408363	BnaA10g12220D, BnaC02g10460D, BnaC02g10490D, BnaC03g12150D, BnaC02g10500D, BnaA02g07430D, BnaA10g07760D, BnaA02g07410D, BnaA02g07400D, BnaA03g09630D, BnaC02g33520D, BnaC09g34450D, BnaA06g34890D, BnaC02g25290D, BnaA02g07390D, BnaAnng36790D, BnaA10g29100D, BnaC05g15740D, BnaA02g27220D
GO:1903890	positive regulation of plant epidermal cell differentiation	P	0.0044	3.5e-05	4	7	0.00265781	8.76852e-05	BnaC03g25810D, BnaC04g01230D, BnaC04g50810D, BnaA03g21400D
GO:0010063	positive regulation of trichoblast fate specification	P	0.0044	3.5e-05	4	7	0.00265781	8.76852e-05	BnaC03g25810D, BnaC04g01230D, BnaC04g50810D, BnaA03g21400D
GO:0042660	positive regulation of cell fate specification	P	0.0044	3.5e-05	4	7	0.00265781	8.76852e-05	BnaC03g25810D, BnaC04g01230D, BnaC04g50810D, BnaA03g21400D
GO:0052547	regulation of peptidase activity	P	0.0045	3.7e-05	11	120	0.00730897	0.00150318	BnaC09g39980D, BnaA04g20550D, BnaA04g20540D, BnaA02g15900D, BnaC03g19420D, BnaC04g44460D, BnaC04g11920D, BnaA01g17260D, BnaA09g19490D, BnaA03g12960D, BnaA09g19480D
GO:0010466	negative regulation of peptidase activity	P	0.0045	3.7e-05	11	120	0.00730897	0.00150318	BnaC09g39980D, BnaA04g20550D, BnaA04g20540D, BnaA02g15900D, BnaC03g19420D, BnaC04g44460D, BnaC04g11920D, BnaA01g17260D, BnaA09g19490D, BnaA03g12960D, BnaA09g19480D
GO:0016530	metallochaperone activity	F	0.0053	4.5e-05	5	17	0.00332226	0.00021295	BnaAnng38380D, BnaC09g10980D, BnaA07g16800D, BnaC06g15850D, BnaC08g27200D
GO:0044711	single-organism biosynthetic process	P	0.0054	4.6e-05	328	14106	0.21794	0.176698	BnaC04g49720D, BnaA06g08770D, BnaA02g08540D, BnaA09g56600D, BnaC06g16410D, BnaA09g30660D, BnaC08g44140D, BnaA02g02250D, BnaA09g41820D, BnaC06g13400D, BnaA08g23220D, BnaA05g07370D, BnaA02g14090D, BnaA09g33560D, BnaC03g02920D, BnaC08g35430D, BnaA09g55740D, BnaC04g41510D, BnaA07g10210D, BnaC05g15740D, BnaC04g41130D, BnaCnng22540D, BnaC07g47120D, BnaC02g23670D, BnaCnng35090D, BnaA09g39580D, BnaA09g50…
GO:0009809	lignin biosynthetic process	P	0.006	5.2e-05	17	280	0.0112957	0.00350741	BnaA03g50190D, BnaA04g13980D, BnaC04g51650D, BnaCnng77500D, BnaAnng35580D, BnaA02g02250D, BnaC07g42660D, BnaC09g42830D, BnaA02g14090D, BnaA07g20440D, BnaC01g22360D, BnaAnng06470D, BnaC02g13760D, BnaA01g18180D, BnaC06g39570D, BnaC04g20200D, BnaC04g56240D
GO:0051346	negative regulation of hydrolase activity	P	0.0063	5.6e-05	11	126	0.00730897	0.00157833	BnaC09g39980D, BnaA04g20550D, BnaA04g20540D, BnaA02g15900D, BnaC03g19420D, BnaC04g44460D, BnaC04g11920D, BnaA01g17260D, BnaA09g19490D, BnaA03g12960D, BnaA09g19480D
GO:0006595	polyamine metabolic process	P	0.0063	5.6e-05	17	282	0.0112957	0.00353246	BnaC06g14510D, BnaAnng15470D, BnaC08g27200D, BnaAnng38380D, BnaA05g37040D, BnaA05g07370D, BnaA05g15310D, BnaA09g33560D, BnaA01g37260D, BnaC08g24360D, BnaA07g16800D, BnaC02g13760D, BnaC07g47650D, BnaC03g20310D, BnaC04g08190D, BnaA07g16060D, BnaC06g15850D
GO:0034285	response to disaccharide	P	0.0063	5.7e-05	40	1055	0.0265781	0.0132154	BnaA03g41940D, BnaA09g34840D, BnaC09g24870D, BnaA10g25120D, BnaA03g50190D, BnaC09g50050D, BnaC02g07110D, BnaC03g04820D, BnaC08g27940D, BnaC02g38800D, BnaC07g42660D, BnaC07g45760D, BnaA09g41600D, BnaA10g07160D, BnaA02g03140D, BnaC08g26010D, BnaC02g28770D, BnaC04g56240D, BnaA09g42570D, BnaC08g22640D, BnaC03g01440D, BnaA04g13980D, BnaA10g17440D, BnaA09g56350D, BnaA09g43390D, BnaC09g40740D, BnaC04g07…
GO:0009744	response to sucrose	P	0.0063	5.7e-05	40	1055	0.0265781	0.0132154	BnaA03g41940D, BnaA09g34840D, BnaC09g24870D, BnaA10g25120D, BnaA03g50190D, BnaC09g50050D, BnaC02g07110D, BnaC03g04820D, BnaC08g27940D, BnaC02g38800D, BnaC07g42660D, BnaC07g45760D, BnaA09g41600D, BnaA10g07160D, BnaA02g03140D, BnaC08g26010D, BnaC02g28770D, BnaC04g56240D, BnaA09g42570D, BnaC08g22640D, BnaC03g01440D, BnaA04g13980D, BnaA10g17440D, BnaA09g56350D, BnaA09g43390D, BnaC09g40740D, BnaC04g07…
GO:0005618	cell wall	C	0.0066	6.1e-05	93	3205	0.061794	0.0401473	BnaA04g20380D, BnaC07g21060D, BnaC06g38880D, BnaCnng54620D, BnaA09g56810D, BnaA02g03720D, BnaC07g40110D, BnaA03g44610D, BnaC02g10500D, BnaC08g44140D, BnaA02g02670D, BnaC05g01540D, BnaA05g11950D, BnaA10g07760D, BnaA03g09630D, BnaC09g34450D, BnaC06g34870D, BnaA02g07390D, BnaAnng36790D, BnaC04g41510D, BnaA10g29100D, BnaA03g14010D, BnaC04g41130D, BnaA09g16050D, BnaA07g08290D, BnaC02g12920D, BnaAnng15…
GO:0030312	external encapsulating structure	C	0.0075	7.2e-05	93	3221	0.061794	0.0403477	BnaA04g20380D, BnaC07g21060D, BnaC06g38880D, BnaCnng54620D, BnaA09g56810D, BnaA02g03720D, BnaC07g40110D, BnaA03g44610D, BnaC02g10500D, BnaC08g44140D, BnaA02g02670D, BnaC05g01540D, BnaA05g11950D, BnaA10g07760D, BnaA03g09630D, BnaC09g34450D, BnaC06g34870D, BnaA02g07390D, BnaAnng36790D, BnaC04g41510D, BnaA10g29100D, BnaA03g14010D, BnaC04g41130D, BnaA09g16050D, BnaA07g08290D, BnaC02g12920D, BnaAnng15…
GO:1903888	regulation of plant epidermal cell differentiation	P	0.0075	7.5e-05	4	9	0.00265781	0.000112738	BnaC03g25810D, BnaC04g01230D, BnaC04g50810D, BnaA03g21400D
GO:0010061	regulation of trichoblast fate specification	P	0.0075	7.5e-05	4	9	0.00265781	0.000112738	BnaC03g25810D, BnaC04g01230D, BnaC04g50810D, BnaA03g21400D
GO:0010057	trichoblast fate specification	P	0.0075	7.5e-05	4	9	0.00265781	0.000112738	BnaC03g25810D, BnaC04g01230D, BnaC04g50810D, BnaA03g21400D
GO:0042659	regulation of cell fate specification	P	0.0075	7.5e-05	4	9	0.00265781	0.000112738	BnaC03g25810D, BnaC04g01230D, BnaC04g50810D, BnaA03g21400D
GO:0090628	plant epidermal cell fate specification	P	0.0075	7.5e-05	4	9	0.00265781	0.000112738	BnaC03g25810D, BnaC04g01230D, BnaC04g50810D, BnaA03g21400D
GO:0016709	oxidoreductase activity, acting on paired donors, with incorporation or reduction of molecular oxygen, NAD(P)H as one donor, and incorporation of one atom of oxygen	F	0.0087	8.7e-05	14	209	0.00930233	0.00261803	BnaA03g12080D, BnaC05g34660D, BnaA04g17570D, BnaA06g11010D, BnaC03g16960D, BnaC05g12520D, BnaA06g11000D, BnaC04g14330D, BnaA05g11950D, BnaC09g47980D, BnaC09g13360D, BnaA09g13190D, BnaA03g14010D, BnaC04g41130D
GO:1902221	erythrose 4-phosphate/phosphoenolpyruvate family amino acid metabolic process	P	0.0097	0.0001	7	51	0.00465116	0.00063885	BnaC06g14510D, BnaA05g07370D, BnaA09g33560D, BnaC08g24360D, BnaC04g08190D, BnaA07g16060D, BnaC05g42780D
GO:0006558	L-phenylalanine metabolic process	P	0.0097	0.0001	7	51	0.00465116	0.00063885	BnaC06g14510D, BnaA05g07370D, BnaA09g33560D, BnaC08g24360D, BnaC04g08190D, BnaA07g16060D, BnaC05g42780D
GO:0010007	magnesium chelatase complex	C	0.0099	0.0001	4	10	0.00265781	0.000125265	BnaAnng38380D, BnaA07g16800D, BnaC06g15850D, BnaC08g27200D
