# Supplementary material for: Transcriptomic Analysis of Seed Coats in Yellow-Seeded Brassica napus Reveals Novel Genes That Influence Proanthocyanidin Biosynthesis
Source: Front Plant Sci. 2017 Oct 5;8:1674. doi: 10.3389/fpls.2017.01674 (PMC5633857; doi:10.3389/fpls.2017.01674)
Supplement: Supplementary file 5 [file DataSheet5.XLSX]

## Sheet: Sheet1
Supplementary File 5. KEGG pathways of DEGs during seed development.
Up-DEGs
Pathway name	Pathway ID	No. of DEG	No. of Background gene	P-Value	Corrected P-Value	Sequence Names
Plant-pathogen interaction	ath04626	59	664	2.81e-16	4.14e-14	BnaC09g16820D, BnaC03g16740D, BnaC05g29540D, BnaA05g12160D, BnaC08g36810D, BnaCnng21080D, BnaA03g02020D, BnaA03g17820D, BnaC05g00780D, BnaC08g28520D, BnaA09g36820D, BnaA03g37660D, BnaA04g01660D, BnaA04g17420D, BnaCnng69860D, BnaC03g03010D, BnaC06g37480D, BnaC06g37490D, BnaA06g18440D, BnaAnng36110D, BnaA03g20180D, BnaA03g27250D, BnaC03g24090D, BnaA03g19320D, BnaC03g35300D, BnaC06g43540D, BnaA09g53…
Plant hormone signal transduction	ath04075	52	1107	1.14e-05	0.000262056	BnaA02g01560D, BnaA09g52740D, BnaC03g71460D, BnaA05g28680D, BnaA02g35330D, BnaA03g33930D, BnaC02g11480D, BnaC05g43150D, BnaC06g22690D, BnaA06g13250D, BnaCnng64910D, BnaC08g34560D, BnaA09g48090D, BnaA02g35250D, BnaA06g09800D, BnaCnng22400D, BnaA01g24190D, BnaC08g37780D, BnaCnng05080D, BnaA07g20770D, BnaA10g06890D, BnaA06g24140D, BnaC01g44060D, BnaA01g28670D, BnaCnng60520D, BnaC01g36030D, BnaC03g39…
Fatty acid elongation	ath00062	11	108	0.000131082	0.00242864	BnaA03g51030D, BnaC08g36720D, BnaC02g30500D, BnaC07g17300D, BnaA02g22340D, BnaC09g20130D, BnaA06g36580D, BnaA10g00700D, BnaA09g18240D, BnaA10g02480D, BnaC05g00780D
Protein processing in endoplasmic reticulum	ath04141	36	801	0.000534398	0.00817563	BnaAnng17140D, BnaC03g11630D, BnaC07g44720D, BnaC03g35220D, BnaC01g20320D, BnaC05g17110D, BnaAnng13800D, BnaC02g44300D, BnaC01g16210D, BnaC03g15980D, BnaC03g78270D, BnaC08g37880D, BnaC08g41750D, BnaC08g38480D, BnaA06g18100D, BnaC05g12240D, BnaA05g30720D, BnaC01g17140D, BnaC02g00800D, BnaA03g24280D, BnaC05g13980D, BnaA06g10730D, BnaA01g14560D, BnaA10g12710D, BnaA01g04320D, BnaA03g49350D, BnaA02g06…
Zeatin biosynthesis	ath00908	8	72	0.000629676	0.00928647	BnaA07g06300D, BnaCnng41060D, BnaC03g23380D, BnaC04g08440D, BnaA03g16830D, BnaCnng24710D, BnaC04g08450D, BnaA05g07590D
Cutin, suberine and wax biosynthesis	ath00073	9	98	0.00104151	0.0148265	BnaC08g27580D, BnaC05g00460D, BnaCnng09200D, BnaA02g32980D, BnaA10g13850D, BnaA02g07380D, BnaA06g18840D, BnaC02g10430D, BnaCnng60030D
ABC transporters	ath02010	8	86	0.0018102	0.0240947	BnaC09g19440D, BnaCnng20520D, BnaA09g02310D, BnaC04g51510D, BnaC09g01680D, BnaA07g19210D, BnaC05g01280D, BnaC04g00490D
Phenylpropanoid biosynthesis	ath00940	25	578	0.00559565	0.0630922	BnaC04g03770D, BnaA02g36250D, BnaAnng11280D, BnaAnng33930D, BnaA09g05060D, BnaC04g47720D, BnaA03g56280D, BnaA01g03520D, BnaA04g23960D, BnaA01g36520D, BnaC08g35130D, BnaA09g29780D, BnaA05g36600D, BnaC04g09760D, BnaC01g18290D, BnaC09g48860D, BnaA01g06830D, BnaA06g40660D, BnaA10g24240D, BnaA01g20110D, BnaC02g46610D, BnaC07g03680D, BnaC06g12560D, BnaA01g15400D, BnaC02g00780D
Galactose metabolism	ath00052	11	191	0.00929064	0.0975914	BnaC09g33200D, BnaA10g10800D, BnaC04g00330D, BnaA05g00720D, BnaC07g38610D, BnaC09g10840D, BnaA08g02130D, BnaCnng63310D, BnaA09g10570D, BnaA04g26930D, BnaC08g41390D
SNARE interactions in vesicular transport	ath04130	9	166	0.0244964	0.20434	BnaC04g28220D, BnaC08g38620D, BnaC08g41760D, BnaA05g27280D, BnaC01g34310D, BnaA03g31960D, BnaC08g38470D, BnaC03g73490D, BnaA04g05470D
Glycolysis / Gluconeogenesis	ath00010	18	444	0.0290335	0.233217	BnaA03g27400D, BnaC09g33200D, BnaAnng13920D, BnaC03g32420D, BnaA03g28460D, BnaAnng00920D, BnaA10g10800D, BnaA03g59170D, BnaC08g49310D, BnaCnng52860D, BnaA08g02130D, BnaCnng13230D, BnaC09g47240D, BnaAnng05000D, BnaC02g43920D, BnaC03g33590D, BnaA10g10590D, BnaA03g28480D
Limonene and pinene degradation	ath00903	10	201	0.0300878	0.237829	BnaAnng14430D, BnaC07g22920D, BnaA01g00520D, BnaAnng14280D, BnaC08g27540D, BnaA02g27830D, BnaC09g47240D, BnaA03g59170D, BnaAnng14290D, BnaC08g40590D
Stilbenoid, diarylheptanoid and gingerol biosynthesis	ath00945	10	214	0.0424279	0.292396	BnaAnng14430D, BnaC07g22920D, BnaC01g18290D, BnaA01g00520D, BnaAnng14280D, BnaC08g27540D, BnaA02g27830D, BnaAnng14290D, BnaA01g15400D, BnaC08g40590D
Glycosphingolipid biosynthesis - globo series	ath00603	3	33	0.0533829	0.342301	BnaC01g39240D, BnaA05g29310D, BnaCnng24210D
Glycerolipid metabolism	ath00561	10	227	0.0578349	0.359591	BnaCnng31250D, BnaC06g19150D, BnaC09g10500D, BnaA09g10340D, BnaA03g59170D, BnaA07g19850D, BnaC05g32850D, BnaC09g47240D, BnaC05g32860D, BnaA10g27560D
Homologous recombination	ath03440	8	170	0.063024	0.384082	BnaC09g37020D, BnaC03g00130D, BnaC03g10310D, BnaA03g08120D, BnaC08g36690D, BnaCnng03270D, BnaA10g14690D, BnaC04g43680D
beta-Alanine metabolism	ath00410	8	173	0.0680475	0.398873	BnaAnng27540D, BnaC03g08350D, BnaC03g06000D, BnaA03g06520D, BnaA03g59170D, BnaC09g47240D, BnaA03g04460D, BnaC02g34260D
Linoleic acid metabolism	ath00591	3	44	0.100515	0.522708	BnaA02g16020D, BnaC02g21440D, BnaC08g37760D
Vitamin B6 metabolism	ath00750	3	44	0.100515	0.522708	BnaC02g21720D, BnaAnng30500D, BnaC05g50000D
Phosphatidylinositol signaling system	ath04070	10	259	0.109837	0.54358	BnaA03g19320D, BnaC02g42850D, BnaA04g02760D, BnaA10g29490D, BnaA09g10340D, BnaC03g50260D, BnaCnng20380D, BnaC09g10500D, BnaC05g00540D, BnaC03g23130D
Taurine and hypotaurine metabolism	ath00430	4	73	0.110779	0.546048	BnaA03g06520D, BnaAnng27540D, BnaC02g34260D, BnaC03g08350D
Butanoate metabolism	ath00650	4	78	0.131	0.598253	BnaA03g06520D, BnaAnng27540D, BnaC02g34260D, BnaC03g08350D
Sulfur metabolism	ath00920	6	144	0.147894	0.645309	BnaC02g42850D, BnaA01g11840D, BnaA06g00050D, BnaC03g50260D, BnaC09g24710D, BnaC05g46910D
Insulin resistance	ath04931	6	146	0.154428	0.660709	BnaC03g34330D, BnaC05g43850D, BnaC01g39350D, BnaA05g31630D, BnaA05g29500D, BnaA01g32300D
Histidine metabolism	ath00340	4	84	0.157088	0.664202	BnaC09g47240D, BnaA03g59170D, BnaC01g27670D, BnaA01g21560D
Starch and sucrose metabolism	ath00500	22	718	0.167937	0.689516	BnaC04g03770D, BnaC03g28870D, BnaA10g17460D, BnaC02g07060D, BnaA09g10570D, BnaC04g50170D, BnaC05g04390D, BnaA03g56280D, BnaC08g41390D, BnaC06g36810D, BnaA09g37830D, BnaA07g26180D, BnaA01g12320D, BnaA08g28410D, BnaC01g25100D, BnaC09g10840D, BnaC09g40790D, BnaC01g14030D, BnaA01g20110D, BnaA08g02130D, BnaA07g32360D, BnaC09g27860D
Glutathione metabolism	ath00480	12	361	0.179906	0.7274	BnaC08g37930D, BnaAnng38510D, BnaC09g15100D, BnaC08g35100D, BnaA04g28600D, BnaC03g51650D, BnaA07g20610D, BnaC01g39170D, BnaA06g21920D, BnaA05g12550D, BnaCnng35440D, BnaC04g40560D
Flavonoid biosynthesis	ath00941	4	93	0.19938	0.764948	BnaA01g15400D, BnaA09g34850D, BnaC01g18290D, BnaAnng08210D
Brassinosteroid biosynthesis	ath00905	2	34	0.210323	0.784088	BnaA01g01320D, BnaC07g51130D
Endocytosis	ath04144	18	599	0.218429	0.787264	BnaC01g16210D, BnaC08g39020D, BnaC04g45970D, BnaC08g38110D, BnaC05g12240D, BnaA06g25550D, BnaA03g32320D, BnaC07g06930D, BnaC04g18290D, BnaC02g00800D, BnaA03g59360D, BnaA09g18320D, BnaC05g43990D, BnaA06g10730D, BnaC05g00540D, BnaA06g03820D, BnaC03g48070D, BnaA04g22230D
Fructose and mannose metabolism	ath00051	8	247	0.26154	0.858681	BnaC09g33200D, BnaA09g37830D, BnaC03g28870D, BnaA10g10800D, BnaA01g19590D, BnaA08g02130D, BnaA08g28410D, BnaC08g49720D
alpha-Linolenic acid metabolism	ath00592	5	142	0.27136	0.876842	BnaA02g16020D, BnaA10g17650D, BnaC02g21440D, BnaC07g22930D, BnaC08g37760D
Lysine degradation	ath00310	4	111	0.29181	0.911266	BnaC09g47240D, BnaA03g20680D, BnaA03g59170D, BnaC06g28920D
Biosynthesis of secondary metabolites	ath01110	106	4138	0.303654	0.915432	BnaCnng70590D, BnaC03g32420D, BnaA02g22340D, BnaAnng11280D, BnaA02g36250D, BnaC05g00780D, BnaA03g27400D, BnaC08g36370D, BnaA02g27830D, BnaAnng14290D, BnaAnng05000D, BnaA05g36600D, BnaC03g33590D, BnaA03g51030D, BnaA03g28460D, BnaC07g22920D, BnaC07g17300D, BnaC09g48860D, BnaAnng27540D, BnaA10g10800D, BnaC08g37760D, BnaA06g10250D, BnaA07g06300D, BnaC09g10500D, BnaC03g26850D, BnaC02g46610D, BnaC07g20…
Carotenoid biosynthesis	ath00906	4	119	0.33468	0.9514	BnaC09g18860D, BnaC07g18360D, BnaCnng57040D, BnaC06g41140D
Fatty acid degradation	ath00071	5	170	0.401835	0.988069	BnaC09g47240D, BnaC05g51350D, BnaC09g11030D, BnaA03g59170D, BnaC08g49310D
Isoquinoline alkaloid biosynthesis	ath00950	3	95	0.412191	0.988069	BnaA09g43800D, BnaC03g26850D, BnaC08g36370D
Diterpenoid biosynthesis	ath00904	3	95	0.412191	0.988069	BnaA06g10250D, BnaC01g12610D, BnaCnng76580D
Carbon fixation in photosynthetic organisms	ath00710	8	292	0.419866	0.997451	BnaC06g24380D, BnaC07g20680D, BnaCnng13230D, BnaAnng05000D, BnaC02g43920D, BnaA03g28480D, BnaA02g12810D, BnaC08g40850D
Circadian rhythm - plant	ath04712	4	144	0.467902	1	BnaC03g03480D, BnaA03g02470D, BnaAnng06150D, BnaC02g01170D
Nitrogen metabolism	ath00910	4	144	0.467902	1	BnaA10g13570D, BnaA02g14850D, BnaC09g41340D, BnaCnng63520D
Tryptophan metabolism	ath00380	5	187	0.480499	1	BnaC09g47240D, BnaC02g22640D, BnaA03g59170D, BnaCnng47400D, BnaA06g15150D
Ascorbate and aldarate metabolism	ath00053	4	148	0.488469	1	BnaC09g47240D, BnaC09g10140D, BnaAnng38510D, BnaA03g59170D
Tyrosine metabolism	ath00350	4	150	0.49863	1	BnaA09g43800D, BnaC03g26850D, BnaC08g36370D, BnaC08g49310D
Pentose and glucuronate interconversions	ath00040	8	319	0.515385	1	BnaC01g25100D, BnaA10g17460D, BnaC02g07060D, BnaC03g06740D, BnaA03g59170D, BnaC09g47240D, BnaC04g50170D, BnaC09g40790D
Arginine and proline metabolism	ath00330	6	237	0.518547	1	BnaA01g01730D, BnaC03g06000D, BnaA03g59170D, BnaA01g01710D, BnaC09g47240D, BnaA03g04460D
Alanine, aspartate and glutamate metabolism	ath00250	6	238	0.522543	1	BnaAnng27540D, BnaC09g41340D, BnaC06g24380D, BnaC03g08350D, BnaA03g06520D, BnaC02g34260D
Inositol phosphate metabolism	ath00562	6	242	0.538394	1	BnaC09g10140D, BnaC02g42850D, BnaC08g35240D, BnaA10g29490D, BnaC03g50260D, BnaC05g00540D
Sesquiterpenoid and triterpenoid biosynthesis	ath00909	2	74	0.541581	1	BnaC08g49140D, BnaA06g26720D
Base excision repair	ath03410	3	120	0.561598	1	BnaA03g26210D, BnaC03g30970D, BnaC08g38570D
Sphingolipid metabolism	ath00600	2	77	0.56257	1	BnaA10g15860D, BnaC04g45620D
Pyruvate metabolism	ath00620	8	334	0.566168	1	BnaA03g28460D, BnaA03g59170D, BnaCnng13230D, BnaC09g47240D, BnaAnng05000D, BnaC02g43920D, BnaA10g10590D, BnaC03g33590D
Ubiquinone and other terpenoid-quinone biosynthesis	ath00130	4	164	0.567068	1	BnaC03g26850D, BnaC07g50260D, BnaA01g16310D, BnaA05g36600D
Degradation of aromatic compounds	ath01220	1	34	0.568887	1	BnaC08g49310D
Phenylalanine metabolism	ath00360	4	175	0.617028	1	BnaA01g15400D, BnaC03g26850D, BnaC01g18290D, BnaA05g36600D
Carbon metabolism	ath01200	24	1047	0.642786	1	BnaC08g41470D, BnaA05g25330D, BnaC06g24380D, BnaAnng00920D, BnaA06g00050D, BnaC02g43920D, BnaA07g19850D, BnaC05g32850D, BnaAnng05000D, BnaC05g32860D, BnaA02g12810D, BnaC03g33590D, BnaA03g28460D, BnaC06g19150D, BnaA10g10800D, BnaA10g10590D, BnaC05g46910D, BnaC08g40850D, BnaC09g33200D, BnaA08g02130D, BnaC07g20680D, BnaCnng13230D, BnaA03g28480D, BnaC08g41110D
mRNA surveillance pathway	ath03015	11	507	0.687507	1	BnaC03g34330D, BnaA08g07610D, BnaC08g37460D, BnaA07g25880D, BnaC03g37130D, BnaA05g31630D, BnaC08g37540D, BnaA01g21840D, BnaC08g38990D, BnaCnng68590D, BnaC06g27490D
Pentose phosphate pathway	ath00030	4	202	0.723369	1	BnaC08g41470D, BnaC09g33200D, BnaA10g10800D, BnaC07g20680D
Spliceosome	ath03040	16	750	0.733022	1	BnaA03g59360D, BnaC05g12240D, BnaA08g11570D, BnaC05g11570D, BnaC01g19980D, BnaA03g32320D, BnaA06g10730D, BnaC04g18290D, BnaC02g00800D, BnaA06g09950D, BnaC01g16210D, BnaA03g07960D, BnaC03g10010D, BnaA06g03820D, BnaA05g24850D, BnaC03g66550D
Peroxisome	ath04146	7	346	0.735235	1	BnaA05g25330D, BnaC09g11030D, BnaA06g18840D, BnaA06g01790D, BnaA10g13850D, BnaC08g27580D, BnaC05g51350D
Metabolic pathways	ath01100	163	7016	0.749687	1	BnaCnng70590D, BnaC03g32420D, BnaAnng11280D, BnaC04g45620D, BnaC05g48920D, BnaC08g13650D, BnaC04g09760D, BnaA02g36250D, BnaC08g41390D, BnaA03g27400D, BnaC08g36370D, BnaAnng08210D, BnaC03g47320D, BnaA02g27830D, BnaC06g07480D, BnaAnng14290D, BnaAnng05000D, BnaC08g40850D, BnaC05g32860D, BnaC07g03680D, BnaC03g33590D, BnaA03g28460D, BnaC07g22920D, BnaC03g56970D, BnaC09g48860D, BnaAnng27540D, BnaC09g10…
Lysine biosynthesis	ath00300	1	57	0.75209	1	BnaA01g03290D
Glyoxylate and dicarboxylate metabolism	ath00630	6	307	0.755296	1	BnaA05g25330D, BnaC06g19150D, BnaC09g41340D, BnaA07g19850D, BnaC08g41110D, BnaA02g12810D
N-Glycan biosynthesis	ath00510	3	175	0.797316	1	BnaA08g24480D, BnaC05g48920D, BnaC03g56970D
Basal transcription factors	ath03022	3	176	0.800389	1	BnaC08g37750D, BnaC06g42440D, BnaC08g23580D
Glycosylphosphatidylinositol(GPI)-anchor biosynthesis	ath00563	1	70	0.818693	1	BnaC08g41770D
RNA degradation	ath03018	8	436	0.829354	1	BnaC09g33200D, BnaC08g36850D, BnaC01g28510D, BnaA06g38950D, BnaA10g10800D, BnaC03g54940D, BnaC06g18060D, BnaA01g00190D
Photosynthesis - antenna proteins	ath00196	1	77	0.84681	1	BnaC08g38660D
Tropane, piperidine and pyridine alkaloid biosynthesis	ath00960	2	138	0.848095	1	BnaC03g26850D, BnaC03g26340D
Glycine, serine and threonine metabolism	ath00260	5	299	0.850147	1	BnaAnng00920D, BnaC06g19150D, BnaC08g41110D, BnaA07g19850D, BnaC08g13650D
Nucleotide excision repair	ath03420	3	205	0.873785	1	BnaC06g42440D, BnaC08g49560D, BnaC08g38480D
Arginine biosynthesis	ath00220	2	153	0.885402	1	BnaC09g41340D, BnaC06g24380D
Biosynthesis of amino acids	ath01230	18	984	0.911556	1	BnaC08g41470D, BnaC09g33200D, BnaC01g27670D, BnaC09g41340D, BnaA01g03290D, BnaAnng00920D, BnaC03g26850D, BnaC06g24380D, BnaA01g21560D, BnaC08g13650D, BnaC07g20680D, BnaA10g10800D, BnaA06g00050D, BnaC03g33590D, BnaA10g10590D, BnaC05g46910D, BnaA03g28460D, BnaA03g28480D
Cyanoamino acid metabolism	ath00460	3	228	0.913862	1	BnaC04g03770D, BnaA03g56280D, BnaA01g20110D
Porphyrin and chlorophyll metabolism	ath00860	2	168	0.914063	1	BnaCnng70590D, BnaC04g24770D
Valine, leucine and isoleucine degradation	ath00280	2	168	0.914063	1	BnaC09g47240D, BnaA03g59170D
Oxidative phosphorylation	ath00190	9	553	0.918932	1	BnaA02g31990D, BnaC02g40580D, BnaA01g28840D, BnaC08g40870D, BnaA09g33870D, BnaAnng34010D, BnaC08g39030D, BnaC08g36360D, BnaA05g23920D
Regulation of autophagy	ath04140	1	104	0.920048	1	BnaC01g13400D
Fatty acid biosynthesis	ath00061	2	172	0.920485	1	BnaC09g11030D, BnaC05g51350D
DNA replication	ath03030	2	174	0.923523	1	BnaCnng36220D, BnaC08g49560D
Glucosinolate biosynthesis	ath00966	1	106	0.923809	1	BnaC02g22640D
Ribosome biogenesis in eukaryotes	ath03008	5	353	0.928859	1	BnaA09g56020D, BnaC03g10010D, BnaAnng21570D, BnaC08g38870D, BnaA03g07960D
Fatty acid metabolism	ath01212	4	301	0.932979	1	BnaC05g51350D, BnaC09g11030D, BnaA09g18240D, BnaC09g20130D
Citrate cycle (TCA cycle)	ath00020	3	248	0.938899	1	BnaAnng05000D, BnaC02g43920D, BnaCnng13230D
Amino sugar and nucleotide sugar metabolism	ath00520	8	528	0.941102	1	BnaA09g37830D, BnaC03g28870D, BnaC07g38610D, BnaA07g26180D, BnaA08g28410D, BnaA01g19590D, BnaA08g02130D, BnaC03g08770D
Photosynthesis	ath00195	2	189	0.943055	1	BnaCnng05610D, BnaC06g07480D
Aminoacyl-tRNA biosynthesis	ath00970	3	255	0.945938	1	BnaC07g45110D, BnaC06g41300D, BnaC04g31520D
Mismatch repair	ath03430	1	127	0.954068	1	BnaC08g49560D
Glycerophospholipid metabolism	ath00564	4	335	0.961221	1	BnaCnng31250D, BnaC06g32670D, BnaA09g10340D, BnaC09g10500D
Steroid biosynthesis	ath00100	1	135	0.962124	1	BnaA06g26720D
Cysteine and methionine metabolism	ath00270	5	423	0.975447	1	BnaC09g24050D, BnaC03g26850D, BnaC08g41620D, BnaC05g46910D, BnaA06g00050D
Phagosome	ath04145	4	387	0.983917	1	BnaC01g34310D, BnaC07g45900D, BnaC08g41760D, BnaC08g40870D
Phenylalanine, tyrosine and tryptophan biosynthesis	ath00400	1	193	0.990654	1	BnaC03g26850D
Ubiquitin mediated proteolysis	ath04120	5	508	0.993976	1	BnaC08g39660D, BnaC03g35220D, BnaC08g37880D, BnaC08g38130D, BnaA09g48660D
Terpenoid backbone biosynthesis	ath00900	1	216	0.994637	1	BnaC01g32770D
Protein export	ath03060	1	217	0.994765	1	BnaA09g48560D
2-Oxocarboxylic acid metabolism	ath01210	2	313	0.995629	1	BnaC02g22640D, BnaC06g24380D
RNA transport	ath03013	6	609	0.996775	1	BnaA08g21430D, BnaC08g39240D, BnaC08g03150D, BnaC08g38990D, BnaC06g19410D, BnaA02g16040D
Pyrimidine metabolism	ath00240	2	451	0.999786	1	BnaC03g47320D, BnaA09g05380D
Purine metabolism	ath00230	3	556	0.999854	1	BnaA03g28460D, BnaA10g10590D, BnaC03g33590D
Ribosome	ath03010	8	1333	1	1	BnaC08g49400D, BnaA02g04070D, BnaC08g36600D, BnaC08g36610D, BnaC02g08020D, BnaC08g37220D, BnaA03g55820D, BnaC08g36460D
Down-DEGs
Pathway name	Pathway ID	No. of DEG	No. of Background gene	P-Value	Corrected P-Value	Sequence Names
Flavonoid biosynthesis	ath00941	33	93	2.76189e-27	1.82616e-24	BnaA09g15710D, BnaA05g11950D, BnaC09g47980D, BnaC08g26010D, BnaC08g26020D, BnaC09g17150D, BnaC02g28770D, BnaC03g06120D, BnaC04g18950D, BnaC08g22640D, BnaC07g45760D, BnaA03g45610D, BnaC03g16960D, BnaC01g29820D, BnaA09g29340D, BnaC02g05070D, BnaC09g43250D, BnaA01g36200D, BnaA01g18180D, BnaA03g41250D, BnaA04g17570D, BnaA03g04590D, BnaA09g31780D, BnaAnng06470D, BnaA09g34840D, BnaA03g60670D, BnaA03g14…
Phenylpropanoid biosynthesis	ath00940	35	578	5.5352e-08	6.09979e-06	BnaC04g03740D, BnaA10g25070D, BnaA05g11950D, BnaC01g31810D, BnaC06g14510D, BnaA05g15310D, BnaC03g56350D, BnaC08g24360D, BnaC04g08190D, BnaC03g16960D, BnaA02g14050D, BnaC05g42780D, BnaC06g26980D, BnaA04g17570D, BnaC08g33770D, BnaC05g36360D, BnaA09g33560D, BnaA02g03720D, BnaA01g18180D, BnaA07g16060D, BnaA04g29560D, BnaC02g07500D, BnaAnng06470D, BnaA05g07370D, BnaA09g40120D, BnaA09g41210D, BnaC08g30…
Phenylalanine metabolism	ath00360	17	175	4.51873e-07	3.83049e-05	BnaA09g33560D, BnaC03g16960D, BnaAnng06470D, BnaA05g11950D, BnaA07g25210D, BnaA07g16060D, BnaA03g14010D, BnaC06g14510D, BnaC08g24360D, BnaC04g08190D, BnaC04g41130D, BnaC06g26980D, BnaA04g17570D, BnaA05g15310D, BnaA05g07370D, BnaC04g14330D, BnaC05g42780D
Degradation of aromatic compounds	ath01220	7	34	1.68062e-05	0.000805237	BnaA05g11950D, BnaA03g14010D, BnaC04g14330D, BnaA09g43000D, BnaC04g41130D, BnaC03g16960D, BnaA04g17570D
Biosynthesis of secondary metabolites	ath01110	123	4138	3.75876e-05	0.00147934	BnaC04g03740D, BnaA03g22000D, BnaA05g11950D, BnaC06g14510D, BnaC02g32750D, BnaC03g06120D, BnaA02g24710D, BnaC04g18950D, BnaA09g43530D, BnaA02g14050D, BnaAnng41480D, BnaA01g13390D, BnaA04g17570D, BnaC05g17710D, BnaA03g01680D, BnaA09g29340D, BnaA09g33560D, BnaA02g03720D, BnaA01g18180D, BnaCnng68040D, BnaA03g41250D, BnaA07g16930D, BnaA03g04590D, BnaC03g02920D, BnaC05g42780D, BnaC03g23410D, BnaC09g27…
Propanoate metabolism	ath00640	8	111	0.00298803	0.0470401	BnaAnng41100D, BnaA08g28670D, BnaA08g28680D, BnaC08g01850D, BnaC08g06560D, BnaC09g22890D, BnaA06g04070D, BnaC08g01840D
Cutin, suberine and wax biosynthesis	ath00073	7	98	0.00559363	0.0783583	BnaCnng20450D, BnaA07g15220D, BnaAnng34510D, BnaC06g13400D, BnaA07g17030D, BnaA07g16940D, BnaA06g19780D
Stilbenoid, diarylheptanoid and gingerol biosynthesis	ath00945	11	214	0.00651506	0.0875561	BnaA08g24400D, BnaA05g11950D, BnaA01g18180D, BnaAnng36890D, BnaA03g14010D, BnaC04g14330D, BnaA07g16930D, BnaC04g41130D, BnaC03g16960D, BnaA04g17570D, BnaAnng06470D
Ubiquinone and other terpenoid-quinone biosynthesis	ath00130	9	164	0.00901536	0.112471	BnaC06g26980D, BnaA05g11950D, BnaA07g25210D, BnaA03g14010D, BnaC04g14330D, BnaC04g41130D, BnaC03g16960D, BnaA05g15310D, BnaA04g17570D
Glutathione metabolism	ath00480	15	361	0.0104732	0.124102	BnaC02g07110D, BnaA10g01510D, BnaC05g01540D, BnaA02g03440D, BnaC09g40740D, BnaA09g45070D, BnaAnng15470D, BnaC08g00080D, BnaC02g07090D, BnaC06g38840D, BnaA10g17440D, BnaC05g01550D, BnaA08g27280D, BnaC04g41510D, BnaA05g11240D
Circadian rhythm - plant	ath04712	8	144	0.0125711	0.143807	BnaC03g06120D, BnaC02g05070D, BnaC09g43250D, BnaA10g19670D, BnaA09g48410D, BnaA03g04590D, BnaA09g29340D, BnaA09g42220D
Aminoacyl-tRNA biosynthesis	ath00970	11	255	0.0205802	0.199526	BnaCnng71990D, BnaA10g30390D, BnaC09g49130D, BnaAnng08940D, BnaA09g44770D, BnaA09g42950D, BnaA08g31530D, BnaA08g18400D, BnaA01g07840D, BnaA06g28710D, BnaA09g44660D
Glucosinolate biosynthesis	ath00966	6	106	0.0266645	0.232699	BnaA06g11000D, BnaC05g12520D, BnaA09g14030D, BnaA09g29790D, BnaA06g11010D, BnaC09g14370D
Anthocyanin biosynthesis	ath00942	2	11	0.0275561	0.237112	BnaA10g07160D, BnaC09g30320D
Valine, leucine and isoleucine degradation	ath00280	8	168	0.0275628	0.237112	BnaA02g30470D, BnaA08g28670D, BnaA08g28680D, BnaC02g38800D, BnaC08g01850D, BnaA07g05850D, BnaC08g01840D, BnaA01g01360D
Brassinosteroid biosynthesis	ath00905	3	34	0.0386279	0.296297	BnaC03g02230D, BnaA03g01680D, BnaC05g34660D
Folate biosynthesis	ath00790	4	68	0.0584204	0.3929	BnaC09g16810D, BnaA09g53350D, BnaC02g02140D, BnaAnng01550D
Indole alkaloid biosynthesis	ath00901	2	18	0.0611861	0.400775	BnaA09g41920D, BnaC06g34870D
beta-Alanine metabolism	ath00410	7	173	0.0745602	0.443338	BnaA08g28670D, BnaA08g28680D, BnaC08g01850D, BnaC09g22890D, BnaA07g05850D, BnaC08g01840D, BnaA01g01360D
Ascorbate and aldarate metabolism	ath00053	6	148	0.093853	0.489612	BnaA02g08540D, BnaAnng15470D, BnaCnng35090D, BnaCnng66150D, BnaA07g05850D, BnaA01g01360D
Flavone and flavonol biosynthesis	ath00944	1	5	0.11552	0.517023	BnaC09g47980D
Nitrogen metabolism	ath00910	5	144	0.185626	0.626843	BnaC02g06690D, BnaA02g03140D, BnaC02g05730D, BnaA03g10890D, BnaA02g02290D
Zeatin biosynthesis	ath00908	3	72	0.194501	0.633777	BnaC01g33530D, BnaA01g26240D, BnaC04g30880D
Cyanoamino acid metabolism	ath00460	7	228	0.201193	0.643272	BnaC08g30380D, BnaC04g03740D, BnaC03g56350D, BnaA03g10890D, BnaA04g29560D, BnaA07g29260D, BnaA09g40120D
Glycolysis / Gluconeogenesis	ath00010	12	444	0.217402	0.663911	BnaA02g24710D, BnaC09g27470D, BnaA09g43380D, BnaC02g32750D, BnaCnng10350D, BnaA09g43000D, BnaA10g26070D, BnaA01g13390D, BnaA09g46260D, BnaA07g05850D, BnaA01g01360D, BnaA09g42580D
Inositol phosphate metabolism	ath00562	7	242	0.242129	0.686676	BnaA02g08540D, BnaC05g48190D, BnaA09g43380D, BnaA02g00400D, BnaC02g00460D, BnaA06g02600D, BnaA09g42760D
Lipoic acid metabolism	ath00785	1	15	0.279197	0.735261	BnaA09g43570D
Fatty acid degradation	ath00071	5	170	0.281754	0.737413	BnaA09g43000D, BnaA02g30470D, BnaA07g05850D, BnaA01g01360D, BnaC02g38800D
Fatty acid biosynthesis	ath00061	5	172	0.289555	0.739202	BnaA06g04070D, BnaAnng41100D, BnaC08g06560D, BnaC06g43550D, BnaA02g17050D
Peroxisome	ath04146	9	346	0.294232	0.748254	BnaA09g18640D, BnaC02g38800D, BnaCnng68040D, BnaCnng20450D, BnaA07g16940D, BnaA02g30470D, BnaA07g17030D, BnaC09g22890D, BnaA06g19780D
Diterpenoid biosynthesis	ath00904	3	95	0.319069	0.770521	BnaA09g13940D, BnaC02g23190D, BnaC03g02920D
Tryptophan metabolism	ath00380	5	187	0.349008	0.796288	BnaA07g05850D, BnaA03g10890D, BnaA09g29790D, BnaA09g31200D, BnaA01g01360D
Nicotinate and nicotinamide metabolism	ath00760	2	61	0.365637	0.809113	BnaA09g42000D, BnaA09g39620D
Phenylalanine, tyrosine and tryptophan biosynthesis	ath00400	5	193	0.373034	0.811553	BnaA06g30990D, BnaA09g30660D, BnaCnng59540D, BnaA08g20870D, BnaC05g17710D
Limonene and pinene degradation	ath00903	5	201	0.405048	0.825167	BnaA07g16930D, BnaA07g05850D, BnaA08g24400D, BnaA01g01360D, BnaAnng36890D
Fructose and mannose metabolism	ath00051	6	247	0.405936	0.825861	BnaAnng15770D, BnaA01g31380D, BnaC09g27470D, BnaA09g43380D, BnaA09g43620D, BnaA09g42580D
Lysine degradation	ath00310	3	111	0.407159	0.827841	BnaA07g05850D, BnaA01g01360D, BnaC06g28920D
RNA degradation	ath03018	10	436	0.416799	0.832089	BnaC01g09760D, BnaAnng15500D, BnaA09g42030D, BnaC09g27470D, BnaA09g32640D, BnaA09g49890D, BnaA08g20740D, BnaA05g36900D, BnaA04g18750D, BnaA09g42580D
Fatty acid metabolism	ath01212	7	301	0.432233	0.84321	BnaC02g38800D, BnaA02g30470D, BnaAnng41100D, BnaC07g34360D, BnaC08g06560D, BnaA02g17050D, BnaA06g04070D
Thiamine metabolism	ath00730	1	28	0.447603	0.849469	BnaC03g42170D
Ribosome biogenesis in eukaryotes	ath03008	8	353	0.44808	0.849887	BnaC03g05950D, BnaA09g42220D, BnaC02g37840D, BnaA05g32360D, BnaA09g43720D, BnaC02g39570D, BnaA09g43170D, BnaA03g14360D
Sesquiterpenoid and triterpenoid biosynthesis	ath00909	2	74	0.457127	0.854787	BnaA04g13460D, BnaCnng76020D
Riboflavin metabolism	ath00740	1	29	0.458797	0.857424	BnaA09g42620D
Selenocompound metabolism	ath00450	2	78	0.483733	0.873892	BnaAnng08940D, BnaA03g28400D
Pentose and glucuronate interconversions	ath00040	7	319	0.490731	0.878667	BnaA09g00740D, BnaC02g12920D, BnaC08g08780D, BnaA02g03420D, BnaA07g05850D, BnaA01g01360D, BnaC03g74840D
Glycerolipid metabolism	ath00561	5	227	0.50671	0.889861	BnaA09g43530D, BnaA09g08200D, BnaC09g08430D, BnaA01g01360D, BnaA07g05850D
Histidine metabolism	ath00340	2	84	0.522086	0.906775	BnaA07g05850D, BnaA01g01360D
Galactose metabolism	ath00052	4	191	0.558825	0.922444	BnaA09g14190D, BnaA05g25610D, BnaA09g42580D, BnaC09g27470D
Metabolic pathways	ath01100	143	7016	0.586681	0.935182	BnaA10g26070D, BnaC04g03740D, BnaA03g22000D, BnaA05g11950D, BnaC06g14510D, BnaC02g32750D, BnaC03g06120D, BnaA09g42000D, BnaA02g24710D, BnaA09g43530D, BnaA02g00400D, BnaA02g14050D, BnaAnng41480D, BnaA01g13390D, BnaA04g17570D, BnaC05g17710D, BnaA09g29340D, BnaA09g33560D, BnaA02g03720D, BnaA01g18180D, BnaCnng68040D, BnaA03g41250D, BnaA07g16930D, BnaA03g04590D, BnaC03g02920D, BnaC05g42780D, BnaC02g12…
Ubiquitin mediated proteolysis	ath04120	10	508	0.604553	0.94433	BnaA09g43160D, BnaA07g11620D, BnaAnng04570D, BnaA03g33820D, BnaA05g17550D, BnaC07g22120D, BnaC06g02270D, BnaA06g03490D, BnaC05g27600D, BnaA04g01440D
Biosynthesis of amino acids	ath01230	19	984	0.64867	0.969656	BnaC03g20310D, BnaA02g03140D, BnaA02g24710D, BnaC09g27470D, BnaC02g32750D, BnaA09g43380D, BnaA07g29260D, BnaCnng59540D, BnaA08g20870D, BnaC08g29460D, BnaA09g30660D, BnaC02g06690D, BnaC05g17710D, BnaA10g26070D, BnaA03g28400D, BnaA06g30990D, BnaA09g46260D, BnaCnng10350D, BnaA09g42580D
Fatty acid elongation	ath00062	2	108	0.655494	0.970886	BnaC07g34360D, BnaA04g16560D
Homologous recombination	ath03440	3	170	0.683182	0.98414	BnaA09g42800D, BnaA07g04290D, BnaA09g29910D
Pyruvate metabolism	ath00620	6	334	0.687948	0.987036	BnaAnng41100D, BnaA09g50050D, BnaC08g06560D, BnaA07g05850D, BnaA06g04070D, BnaA01g01360D
Basal transcription factors	ath03022	3	176	0.705144	0.992425	BnaA02g29860D, BnaA06g30830D, BnaA09g45000D
Mismatch repair	ath03430	2	127	0.738615	1	BnaA07g04290D, BnaA09g29910D
Glycine, serine and threonine metabolism	ath00260	5	299	0.7391	1	BnaA07g29260D, BnaA02g24710D, BnaCnng10350D, BnaA10g26070D, BnaC02g32750D
Proteasome	ath03050	4	245	0.744596	1	BnaC09g21110D, BnaCnng07150D, BnaA09g19170D, BnaC04g28610D
Biotin metabolism	ath00780	1	68	0.756536	1	BnaA02g17050D
Glyoxylate and dicarboxylate metabolism	ath00630	5	307	0.759157	1	BnaCnng68040D, BnaC02g06690D, BnaA02g03140D, BnaA07g29260D, BnaC08g29460D
Glycosylphosphatidylinositol(GPI)-anchor biosynthesis	ath00563	1	70	0.766313	1	BnaA09g42490D
Cysteine and methionine metabolism	ath00270	7	423	0.769464	1	BnaC03g20310D, BnaAnng21950D, BnaAnng12450D, BnaA09g42250D, BnaA07g06210D, BnaAnng41480D, BnaA03g28400D
Protein processing in endoplasmic reticulum	ath04141	14	801	0.769763	1	BnaA09g43390D, BnaA09g43020D, BnaC06g02270D, BnaAnng04570D, BnaA04g01440D, BnaA09g43260D, BnaA05g17550D, BnaCnng09890D, BnaA07g11620D, BnaA08g01570D, BnaC07g22120D, BnaA02g18370D, BnaA06g03490D, BnaC05g27600D
Arachidonic acid metabolism	ath00590	1	71	0.771054	1	BnaA05g11240D
Biosynthesis of unsaturated fatty acids	ath01040	2	136	0.771629	1	BnaA02g30470D, BnaC02g38800D
2-Oxocarboxylic acid metabolism	ath01210	5	313	0.773424	1	BnaA06g11000D, BnaC05g12520D, BnaA06g11010D, BnaA09g29790D, BnaC08g29460D
One carbon pool by folate	ath00670	1	74	0.784706	1	BnaA07g29260D
Pentose phosphate pathway	ath00030	3	202	0.786941	1	BnaA09g46150D, BnaA09g42580D, BnaC09g27470D
alpha-Linolenic acid metabolism	ath00592	2	142	0.791566	1	BnaA02g30470D, BnaC02g38800D
Starch and sucrose metabolism	ath00500	12	718	0.805504	1	BnaA09g00740D, BnaC02g12920D, BnaC08g30380D, BnaA01g05260D, BnaA05g25610D, BnaC04g03740D, BnaC03g56350D, BnaA03g48650D, BnaA04g29560D, BnaA02g03420D, BnaA04g16630D, BnaA09g40120D
RNA transport	ath03013	10	609	0.805986	1	BnaA09g37430D, BnaA02g06400D, BnaA06g00550D, BnaA09g42030D, BnaA05g32360D, BnaA09g32640D, BnaA08g20740D, BnaA05g36900D, BnaA09g41220D, BnaC06g07060D
RNA polymerase	ath03020	2	151	0.81859	1	BnaA08g09570D, BnaA03g09670D
Terpenoid backbone biosynthesis	ath00900	3	216	0.822602	1	BnaA09g41820D, BnaC05g31920D, BnaC03g42170D
Arginine biosynthesis	ath00220	2	153	0.824153	1	BnaC02g06690D, BnaA02g03140D
ABC transporters	ath02010	1	86	0.831654	1	BnaA06g06550D
Ether lipid metabolism	ath00565	1	88	0.838418	1	BnaC05g48190D
DNA replication	ath03030	2	174	0.873909	1	BnaA07g04290D, BnaA09g29910D
Plant hormone signal transduction	ath04075	18	1107	0.874038	1	BnaA06g37000D, BnaC09g48380D, BnaA03g19030D, BnaA03g38960D, BnaA08g02850D, BnaA09g44210D, BnaA01g02430D, BnaC08g47390D, BnaC07g51040D, BnaC03g02950D, BnaA03g01960D, BnaA03g36950D, BnaAnng15390D, BnaC04g17630D, BnaC04g07010D, BnaA03g21130D, BnaC08g03080D, BnaA05g16250D
Regulation of autophagy	ath04140	1	104	0.883614	1	BnaA02g29710D
Carbon metabolism	ath01200	16	1047	0.913275	1	BnaA02g24710D, BnaC09g27470D, BnaCnng68040D, BnaA09g43380D, BnaA07g29260D, BnaA08g28670D, BnaA08g28680D, BnaC08g29460D, BnaC08g01850D, BnaA09g46150D, BnaA10g26070D, BnaC02g32750D, BnaA09g46260D, BnaC08g01840D, BnaCnng10350D, BnaA09g42580D
Base excision repair	ath03410	1	120	0.91618	1	BnaA06g08670D
Ribosome	ath03010	21	1333	0.917298	1	BnaC06g27920D, BnaC07g32120D, BnaAnng00420D, BnaC07g25130D, BnaA10g01420D, BnaA09g43060D, BnaA09g44000D, BnaC09g49300D, BnaA04g03380D, BnaA06g31450D, BnaA04g21290D, BnaC08g13760D, BnaC05g01460D, BnaC05g13680D, BnaA08g19000D, BnaCnng28740D, BnaA03g18590D, BnaC02g37380D, BnaC05g18740D, BnaA04g19260D, BnaA09g41430D
Nucleotide excision repair	ath03420	2	205	0.924058	1	BnaA07g04290D, BnaA09g29910D
Steroid biosynthesis	ath00100	1	135	0.93839	1	BnaA06g02910D
Tropane, piperidine and pyridine alkaloid biosynthesis	ath00960	1	138	0.942069	1	BnaA03g22000D
Insulin resistance	ath04931	1	146	0.950843	1	BnaA02g29710D
Tyrosine metabolism	ath00350	1	150	0.954719	1	BnaA09g43000D
Arginine and proline metabolism	ath00330	2	237	0.95572	1	BnaA07g05850D, BnaA01g01360D
Alanine, aspartate and glutamate metabolism	ath00250	2	238	0.95647	1	BnaC02g06690D, BnaA02g03140D
Glycerophospholipid metabolism	ath00564	3	335	0.968397	1	BnaA09g43530D, BnaC05g48190D, BnaC03g23410D
Phosphatidylinositol signaling system	ath04070	2	259	0.969675	1	BnaA09g43530D, BnaA06g02600D
mRNA surveillance pathway	ath03015	5	507	0.978542	1	BnaA09g44760D, BnaA09g32640D, BnaA08g20740D, BnaA09g42030D, BnaA05g36900D
Carbon fixation in photosynthetic organisms	ath00710	2	292	0.98298	1	BnaA09g43380D, BnaA09g46260D
Pyrimidine metabolism	ath00240	4	451	0.983005	1	BnaA09g02050D, BnaCnng22540D, BnaA03g09670D, BnaA08g09570D
Protein export	ath03060	1	217	0.988573	1	BnaA09g42640D
Oxidative phosphorylation	ath00190	5	553	0.988688	1	BnaC08g17280D, BnaA09g41670D, BnaA09g43200D, BnaA09g56670D, BnaA08g23220D
Plant-pathogen interaction	ath04626	6	664	0.993357	1	BnaA09g44420D, BnaA03g36110D, BnaC03g41980D, BnaAnng15200D, BnaC07g12230D, BnaC02g38300D
Citrate cycle (TCA cycle)	ath00020	1	248	0.993962	1	BnaC08g29460D
Phagosome	ath04145	2	387	0.99693	1	BnaA09g43200D, BnaC07g18770D
Purine metabolism	ath00230	2	556	0.999871	1	BnaA08g09570D, BnaA03g09670D
Endocytosis	ath04144	2	599	0.999943	1	BnaAnng13010D, BnaA05g29660D
Amino sugar and nucleotide sugar metabolism	ath00520	1	528	0.999981	1	BnaA04g16630D
Spliceosome	ath03040	2	750	0.999997	1	BnaC03g56670D, BnaA06g23400D
